# Supplementary material for: Visible light driven deuteration of formyl C–H and hydridic C(sp3)–H bonds in feedstock chemicals and pharmaceutical molecules
Source: Chem Sci. 2020 Aug 5;11(33):8912–8. doi: 10.1039/d0sc02661a (PMC8163369; doi:10.1039/d0sc02661a)

# Visible Light Driven Deuteration of Formyl C-H and Hydridic C(sp<sup>3</sup>)-H Bonds in Feedstock Chemicals and Pharmaceutical Molecules

Yulong Kuang, Hui Cao, Haidi Tang, Junhong Chew, Wei Chen, Xiangcheng Shi, Jie Wu\*

Department of Chemistry, National University of Singapore, 3 Science Drive 3,  
Singapore, 117543, Singapore

E-Mail: [chmjie@nus.edu.sg](mailto:chmjie@nus.edu.sg)

## Table of Contents

|                                                                            |           |
|----------------------------------------------------------------------------|-----------|
| <b>1. General considerations .....</b>                                     | <b>1</b>  |
| <b>2. Investigation for optimal conditions .....</b>                       | <b>2</b>  |
| 1) Time course of selective sequential deuteration of 4-anisaldehyde ..... | 2         |
| 2) Investigation of phase transfer agents .....                            | 2         |
| <b>3. General procedure .....</b>                                          | <b>3</b>  |
| <b>4. Results of deuteration of other hydridic C/X-H bonds.....</b>        | <b>3</b>  |
| <b>5. Radical clock expriment.....</b>                                     | <b>4</b>  |
| <b>6. Characterization of new compounds .....</b>                          | <b>4</b>  |
| <b>7. Reference .....</b>                                                  | <b>27</b> |
| <b>8. Copies of NMR spectra .....</b>                                      | <b>28</b> |

# 1. General considerations

All catalytic reactions were carried out with commercially available reagents in Schlenk tube (10 mL) under an argon atmosphere with magnetic stirring after freeze-pump-thaw.  $^1\text{H}$  NMR yield was detected by adding  $\text{CH}_2\text{Br}_2$  as an internal standard. The isolated yield was the purified product by flash chromatography over silica gel.  $^1\text{H}$  NMR spectra were recorded on commercial instruments (500 MHz). Chemical shifts were reported in ppm from the solvent resonance as the internal standard ( $\text{CDCl}_3$ ,  $\delta = 7.26$ ). Spectra were reported as follows: chemical shift ( $\delta$  ppm), multiplicity (s = singlet, d = doublet, t = triplet, q = quartet, hept = heptet, m = multiplet), coupling constants (Hz), integration and assignment.  $^{13}\text{C}$  NMR spectra were recorded on commercial instruments (126 MHz). Chemical shift was reported in ppm from the solvent resonance as the internal standard ( $\text{CDCl}_3$ ,  $\delta = 77$ ). The densely deuterated compounds were also checked by D NMR spectra which were recorded on commercial instruments (77 MHz). Spectra ( $\text{CHCl}_3$ ) were reported in ppm from the comparison with its resonance in the corresponding  $^1\text{H}$  NMR spectra. Grey dots (“•”) on the structures represent that the deuterium incorporation is less than 2% based on analysis of  $^1\text{H}$  NMR spectra, but deuterium signals showed on D NMR spectrum. HRMS was recorded on a commercial apparatus (EI source).

TBADT (tetra-*n*-butylammonium decatungstate)<sup>1</sup> and thiol (2,4,6-triisopropylthiophenol)<sup>2</sup> were synthesized according to the reported literatures.

## 2. Investigation for optimal conditions

### 1) Time course of selective sequential deuteration of 4-anisaldehyde

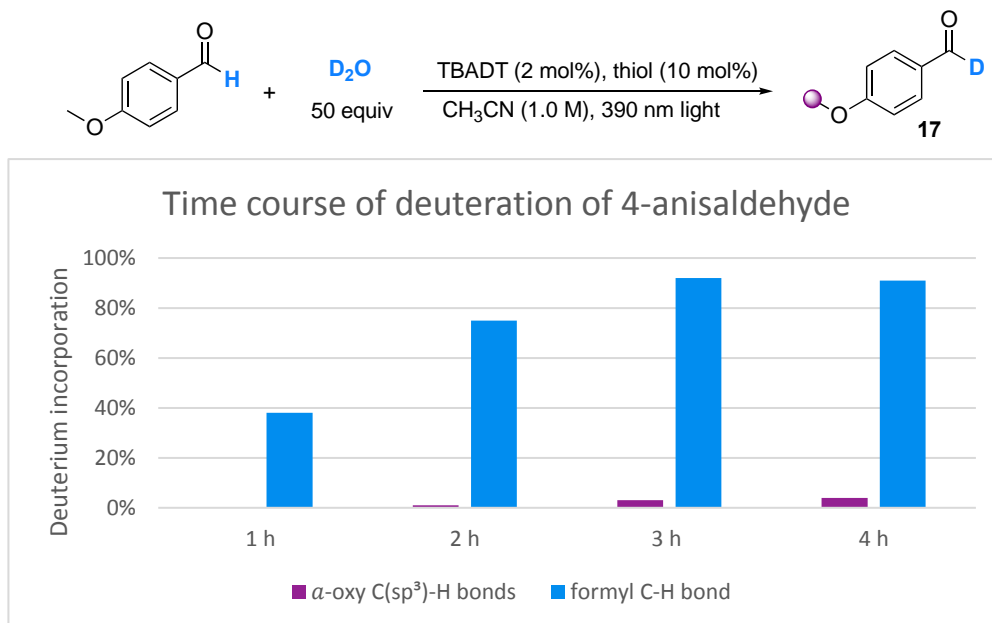

**Figure S1.** Time course study in selective sequential deuteration of 4-anisaldehyde

### 2) Investigation of phase transfer agents

**Table S1.** Investigation of various phase transfer agents<sup>a</sup>

Chemical reaction scheme showing the deuteration of a substrate (BzO-CH<sub>2</sub>-CH<sub>2</sub>-CH<sub>2</sub>-CH<sub>2</sub>-CH<sub>3</sub>) with  $D_2O$  (50 equiv) in the presence of TBADT (2 mol%), thiol (10 mol%), and an additive (10 mol%) in  $CH_3CN$  (1.0 M) under 390 nm light for 24 h, yielding product **23** (BzO-CH<sub>2</sub>-CH<sub>2</sub>-CH<sub>2</sub>-CH<sub>2</sub>-CH<sub>2</sub>-D).

| entry          | additive                                   | results            |                                      |
|----------------|--------------------------------------------|--------------------|--------------------------------------|
|                |                                            | yield <sup>b</sup> | deuterium incorporation <sup>c</sup> |
| 1              | no                                         | 96%                | 84%                                  |
| 2              | TBAF•3H <sub>2</sub> O                     | 94%                | 90%                                  |
| 3              | TBAB                                       | 96%                | 90%                                  |
| 4 <sup>d</sup> | TBAB                                       | 99%                | 91%                                  |
| 5              | TBAI                                       | 90%                | 90%                                  |
| 6              | <i>n</i> Bu <sub>4</sub> N•BF <sub>4</sub> | 92%                | 89%                                  |
| 7              | SDS                                        | 93%                | 27%                                  |
| 8              | PPh <sub>4</sub> Cl                        | 94%                | 4%                                   |

<sup>a</sup> Reaction was conducted with the indicated additive (10 mol%) for 24 h. <sup>b</sup> Yield was determined by analysis of <sup>1</sup>H NMR spectra of the crude product mixture using CH<sub>2</sub>Br<sub>2</sub> as an internal standard. <sup>c</sup> Deuterium incorporation was determined by analysis of <sup>1</sup>H NMR spectra of products. <sup>d</sup> 20 mol% TBAB was added. TBAF = tetra-*n*-butylammonium fluoride; TBAB = tetra-*n*-butylammonium bromide; TBAI = tetra-*n*-butylammonium iodide; SDS = sodium 1-decanesulfonate.

### 3. General procedure

**General procedure for deuteration of formyl C-H bonds:** The aldehyde substrate (0.2 mmol), TBADT (13.2 mg, 2 mol%), thiol (5  $\mu$ L, 10 mol%), D<sub>2</sub>O (180  $\mu$ L, 50 equiv) and CH<sub>3</sub>CN (200  $\mu$ L, 1.0 M) were added to a 10 mL Schlenk tube equipped with a stir bar. The mixture was operated by freeze-pump-thaw procedures three times before charging the tube with argon. The reactor was then sealed and placed under 390 nm Kessil light (80 W) and stirred for 4 h. Then, the crude reaction mixture was extracted with diethyl ether (3  $\times$  2 mL). The combined organic layer was concentrated and purified by flash column chromatography over silica gel to afford the deuterated product.

**General procedure for deuteration of hydridic C(sp<sup>3</sup>)-H bonds and pharmaceuticals:** A substrate (0.2 mmol), TBADT (13.2 mg, 2 mol%), thiol (5  $\mu$ L, 10 mol%), D<sub>2</sub>O (360  $\mu$ L, 100 equiv), TBAB (12.8 mg, 20 mol%) and CH<sub>3</sub>CN (200  $\mu$ L, 1.0 M) were added to a Schlenk tube (10 mL) equipped with a stir bar. The mixture was operated by freeze-pump-thaw procedures three times before being charged with argon. The reactor was placed under 390 nm Kessil light (80 W) and kept stirring for 24 or 48 h. The crude reaction mixture was extracted with ethyl acetate (3  $\times$  2 mL). The combined organic layer was concentrated and purified by flash column chromatography over silica gel to afford the deuterated product. C<sub>6</sub>H<sub>5</sub>CF<sub>3</sub> (200  $\mu$ L, 1.0 M) was added at the beginning in cases where the substrate has low solubility in CH<sub>3</sub>CN.

### 4. Results of deuteration of other hydridic C/X-H bonds

**a) allylic C(sp<sup>3</sup>)-H: decompose**

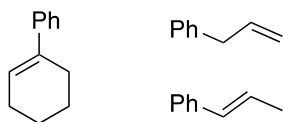

**b)  $\alpha$ -hydroxyl C-H bonds: only starting material detected**

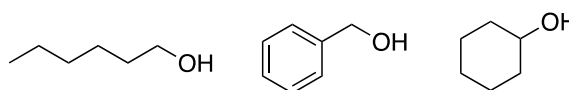

**c) X-H bonds**

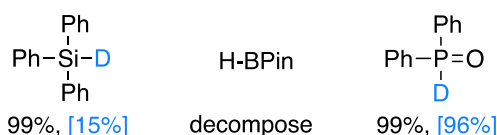

**Figure S2.** Results on deuteration of other hydridic C/X-H bonds

## 5. Radical clock experiment

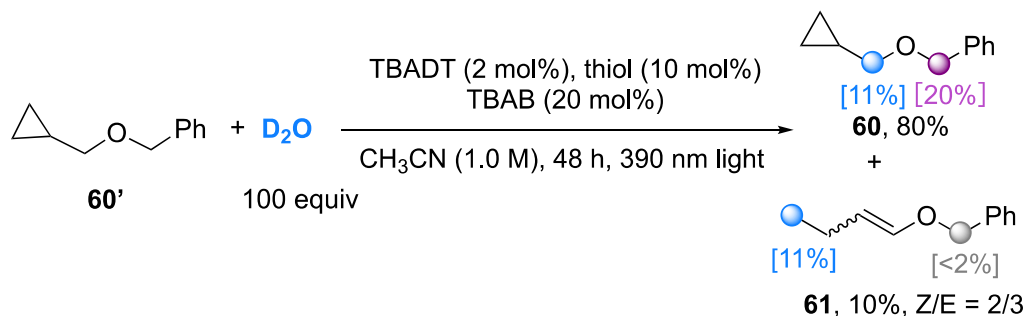

The reaction was conducted under the optimal conditions with 20 mol% TBAB. After 48 h under 390 nm light irradiation, the reaction mixture was quenched. The crude NMR showed the above results by comparing with the known spectra.<sup>3</sup> The deuterium incorporation was obtained from  $^1H$  NMR spectra of products after purification.

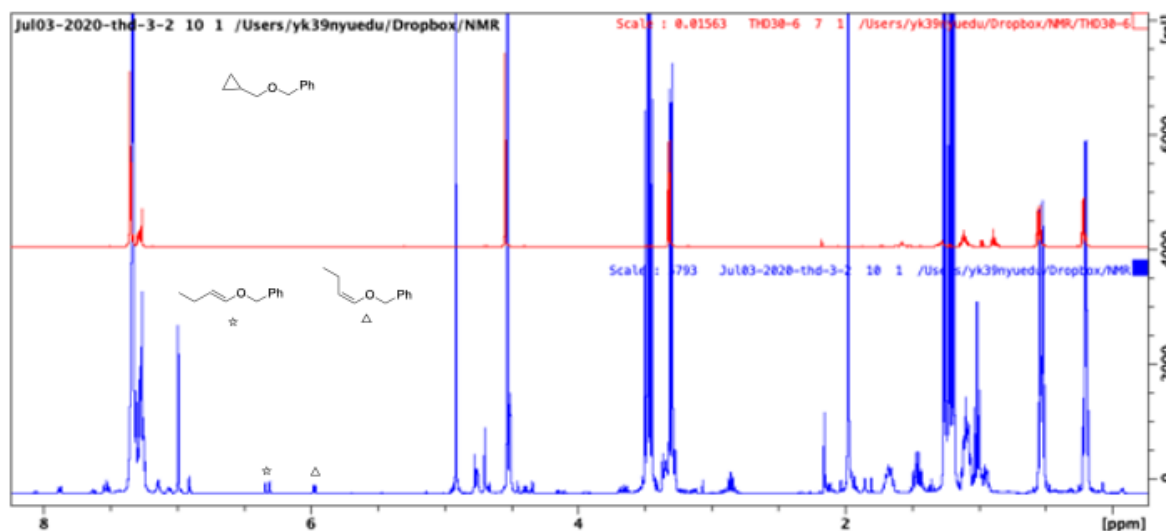

## 6. Characterization of new compounds

4-Bromobenzaldehyde-formyl-*d*1 (**1**):

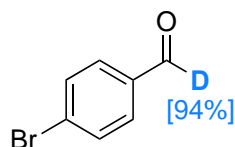

Prepared following the general procedure.  $^1H$  NMR spectrum showed 94% deuterium incorporation and quantitative yield ( $> 99\%$ ) with  $CH_2Br_2$  as an internal standard. Then the crude mixture was purified over silica gel chromatography (hexane : diethyl ether = 20 : 1) to afford product as a colorless solid in 31.6 mg (85% yield).  $^1H$  NMR (500 MHz,  $CDCl_3$ )  $\delta$  = 9.96 (s, 0.06H), 7.73 (d,  $J$  = 8.0 Hz, 2H), 7.66 (d,  $J$  = 8.0 Hz, 2H).  $^{13}C$  NMR (126 MHz,  $CDCl_3$ )  $\delta$  = 191.0 (COH), 190.7 (t,  $J$  = 27.2 Hz, COD), 134.9, 132.3, 130.9, 129.7. HRMS (EI-TOF) calcd for  $C_7H_4DBrO$  ( $M^+$ ) = 189.9561, found 186.9562.

#### 4-Chlorobenzaldehyde-formyl-*d*1 (**2**):

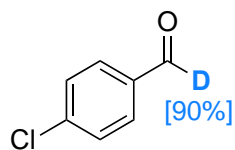

Prepared following the general procedure.  $^1\text{H}$  NMR spectrum showed 90% deuterium incorporation and quantitative yield ( $> 99\%$ ) with  $\text{CH}_2\text{Br}_2$  as an internal standard. Then the crude mixture was purified over silica gel chromatography (hexane : diethyl ether = 20 : 1) to afford product as a colorless oil in 24.8 mg (88% yield).  $^1\text{H}$  NMR (500 MHz,  $\text{CDCl}_3$ )  $\delta$  = 9.98 (s, 0.10H), 7.82 (d,  $J$  = 8.5 Hz, 2H), 7.51 (d,  $J$  = 8.5 Hz, 2H).  $^{13}\text{C}$  NMR (126 MHz,  $\text{CDCl}_3$ )  $\delta$  = 190.8 (COH), 190.5 (t,  $J$  = 26.8 Hz, COD), 140.9, 134.6 (t,  $J$  = 3.8 Hz), 130.9, 129.4. HRMS (EI-TOF) calcd for  $\text{C}_7\text{H}_4\text{DClO}$  ( $\text{M}^+$ ) = 141.0086, found 141.0081.

#### 4-Fluorobenzaldehyde-formyl-*d*1 (**3**):

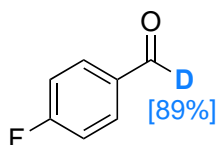

Prepared following the general procedure.  $^1\text{H}$  NMR spectrum showed 89% deuterium incorporation and quantitative yield ( $> 99\%$ ) using  $\text{CH}_2\text{Br}_2$  as an internal standard. Then the crude mixture was purified over silica gel chromatography (hexane : diethyl ether = 20 : 1) to afford product as a colorless oil in 22.2 mg (86% yield).  $^1\text{H}$  NMR (500 MHz,  $\text{CDCl}_3$ )  $\delta$  = 9.96 (s, 0.11H), 7.96 – 7.86 (m, 2H), 7.24 – 7.17 (m, 2H).  $^{13}\text{C}$  NMR (126 MHz,  $\text{CDCl}_3$ )  $\delta$  = 190.5 (COH), 190.2 (t,  $J$  = 26.6 Hz, COD), 166.5 (d,  $J$  = 257.4 Hz), 133.0 – 132.5 (m), 132.2 (d,  $J$  = 9.6 Hz), 116.3 (d,  $J$  = 22.6 Hz). HRMS (EI-TOF) calcd for  $\text{C}_7\text{H}_4\text{DFO}$  ( $\text{M}^+$ ) = 125.0382, found 125.0384.

#### 4-Acetoxybenzaldehyde-formyl-*d*1 (**4**):

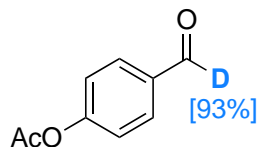

Prepared following the general procedure by using 365 nm (24 W) LED strip instead of 390 nm (80 W) Kessil light for 24 h.  $^1\text{H}$  NMR spectrum showed 93% deuterium incorporation and 99% yield using  $\text{CH}_2\text{Br}_2$  as an internal standard. Then the crude mixture was purified over silica gel chromatography (hexane : diethyl ether = 20 : 1) to afford product as a colorless oil in 31.7 mg (96% yield).  $^1\text{H}$  NMR (500 MHz,  $\text{CDCl}_3$ )  $\delta$  = 9.99 (s, 0.07H), 7.92 (d,  $J$  = 8.5 Hz, 2H), 7.27 (d,  $J$  = 8.5 Hz, 2H), 2.33 (s, 3H).  $^{13}\text{C}$  NMR (126 MHz,  $\text{CDCl}_3$ )  $\delta$  = 190.9 (COH), 190.6 (t,  $J$  = 26.6 Hz, COD), 168.6, 153.3, 133.9 (t,  $J$  = 3.5 Hz), 131.1, 122.3, 21.1. HRMS (EI-TOF) calcd for  $\text{C}_9\text{H}_7\text{DO}_3$  ( $\text{M}^+$ ) = 165.0531, found 165.0532.

#### 4-Acetamidobenzaldehyde-formyl-*d*1 (**5**):

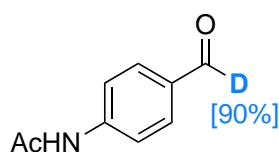

Prepared following the general procedure. <sup>1</sup>H NMR spectrum showed 90% deuterium incorporation and 95% yield using CH<sub>2</sub>Br<sub>2</sub> as an internal standard. Then the crude mixture was purified over silica gel chromatography (hexane : diethyl ether = 20 : 1) to afford product as a colorless solid in 29.5 mg (90% yield). <sup>1</sup>H NMR (500 MHz, CD<sub>3</sub>CN) δ = 9.87 (s, 0.10H), 8.71 (br, 1H), 7.88 – 7.79 (m, 2H), 7.78 – 7.68 (m, 2H), 2.10 (s, 3H). <sup>13</sup>C NMR (126 MHz, CD<sub>3</sub>CN) δ = 192.3 (COH), 192.0 (t, *J* = 26.8 Hz, COD), 170.3, 145.7, 132.9, 131.8, 119.8, 24.7. HRMS (EI-TOF) calcd for C<sub>9</sub>H<sub>8</sub>DNO<sub>2</sub> (M<sup>+</sup>) = 164.0691, found 164.0690.

#### 4-Hydroxybenzaldehyde-formyl-*d*1 (**6**):

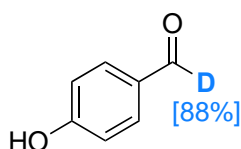

Prepared following the general procedure. <sup>1</sup>H NMR spectrum showed 88% deuterium incorporation and 95% yield using CH<sub>2</sub>Br<sub>2</sub> as an internal standard. Then the crude mixture was purified over silica gel chromatography (hexane : diethyl ether = 5 : 1) to afford product as a colorless solid in 21.4 mg (87% yield). <sup>1</sup>H NMR (500 MHz, CD<sub>3</sub>CN) δ = 9.82 (s, 0.12H), 7.77 (d, *J* = 8.5 Hz, 2H), 6.96 (d, *J* = 8.5 Hz, 2H). <sup>13</sup>C NMR (126 MHz, CD<sub>3</sub>CN) δ = 191.9 (COH), 191.2 (t, *J* = 28.1 Hz, COD), 163.7, 133.1, 130.6 (t, *J* = 3.7 Hz), 116.9. HRMS (EI-TOF) calcd for C<sub>7</sub>H<sub>5</sub>DO<sub>2</sub> (M<sup>+</sup>) = 123.0425, found 123.0423.

#### 4-(Trifluoromethyl)benzaldehyde-formyl-*d*1 (**7**):

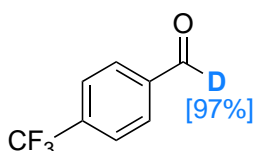

Prepared following the general procedure. <sup>1</sup>H NMR spectrum showed 97% deuterium incorporation and 80% yield using CH<sub>2</sub>Br<sub>2</sub> as an internal standard. Then the compound was purified over silica gel chromatography (hexane : diethyl ether = 20 : 1) to afford product as a colorless oil in 26.2 mg (70% yield). <sup>1</sup>H NMR (500 MHz, CDCl<sub>3</sub>) δ = 10.10 (s, 0.03H), 8.01 (d, *J* = 8.0 Hz, 2H), 7.80 (d, *J* = 8.0 Hz, 2H). <sup>13</sup>C NMR (126 MHz, CDCl<sub>3</sub>) δ = 190.7 (t, *J* = 26.8 Hz, COD), 138.5, 135.6 (q, *J* = 32.8 Hz), 129.9, 126.8 (q, *J* = 3.8 Hz), 123.4 (q, *J* = 273.5 Hz). HRMS (EI-TOF) calcd for C<sub>8</sub>H<sub>4</sub>DF<sub>3</sub>O (M<sup>+</sup>) = 175.0350, found 175.0346.

#### 4-Cyanobenzaldehyde-formyl-*d*1 (**8**):

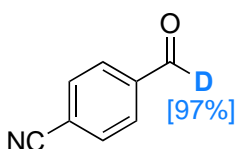

Prepared following the general procedure. <sup>1</sup>H NMR spectrum showed 97% deuterium incorporation and 75% yield using CH<sub>2</sub>Br<sub>2</sub> as an internal standard. Then the crude mixture was purified over silica gel

chromatography (hexane : diethyl ether = 20 : 1) to afford product as a colorless oil in 18.5 mg (70% yield).  $^1\text{H}$  NMR (500 MHz,  $\text{CDCl}_3$ )  $\delta$  = 10.09 (s, 0.03H), 8.00 (d,  $J$  = 8.5 Hz, 2H), 7.85 (d,  $J$  = 8.5 Hz, 2H).  $^{13}\text{C}$  NMR (126 MHz,  $\text{CDCl}_3$ )  $\delta$  = 190.2 (t,  $J$  = 27.5 Hz, COD), 138.6 (t,  $J$  = 3.7 Hz), 132.9, 129.8, 117.7, 117.6. HRMS (EI-TOF) calcd for  $\text{C}_8\text{H}_4\text{DNO}$  ( $\text{M}^+$ ) = 132.0428, found 132.0429.

#### 4-(4,4,5,5-Tetramethyl-1,3,2-dioxaborolan-2-yl)benzaldehyde-formyl-*dl* (**9**):

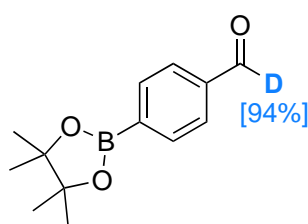

Prepared following the general procedure.  $^1\text{H}$  NMR spectrum showed 94% deuterium incorporation and quantitative yield (> 99%) with  $\text{CH}_2\text{Br}_2$  as an internal standard. Then the compound was purified over silica gel chromatography (hexane : diethyl ether = 2 : 1) to afford product as a colorless solid in 34.9 mg (75% yield).  $^1\text{H}$  NMR (500 MHz,  $\text{CDCl}_3$ )  $\delta$  = 10.04 (s, 0.06H), 7.96 (d,  $J$  = 8.0 Hz, 2H), 7.86 (d,  $J$  = 8.0 Hz, 2H), 1.36 (s, 9H).  $^{13}\text{C}$  NMR (126 MHz,  $\text{CDCl}_3$ )  $\delta$  = 192.6 (COH), 192.3 (t,  $J$  = 26.7 Hz, COD), 138.0 (t,  $J$  = 3.2 Hz), 135.2, 128.7, 84.3, 24.9. HRMS (EI-TOF) calcd for  $\text{C}_{13}\text{H}_{16}\text{DBO}_3$  ( $\text{M}^+$ ) = 233.1328, found 233.1323.

#### 4-Benzyloxybenzaldehyde-formyl-*dl* (**10**):

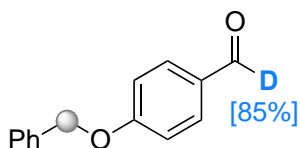

Prepared following the general procedure for 8 h.  $^1\text{H}$  NMR spectrum showed 85% deuterium incorporation on the formyl C-H bond, less than 2% deuterium incorporation on the  $\alpha$ -oxy  $\text{C}(\text{sp}^3)\text{-H}$  bonds and 99% yield using  $\text{CH}_2\text{Br}_2$  as an internal standard. Then crude mixture was purified over silica gel chromatography (hexane : diethyl ether = 20 : 1) to afford product as a colorless solid in 36.7 mg (86% yield).  $^1\text{H}$  NMR (500 MHz,  $\text{CDCl}_3$ )  $\delta$  = 9.89 (s, 0.15H), 7.86 – 7.82 (m, 2H), 7.46 – 7.37 (m, 4H), 7.37 – 7.31 (m, 1H), 7.08 (d,  $J$  = 8.5 Hz, 2H), 5.15 (s, 2H).  $^{13}\text{C}$  NMR (126 MHz,  $\text{CDCl}_3$ )  $\delta$  = 190.7 (COH), 190.4 (t,  $J$  = 26.3 Hz, COD), 163.7, 135.9, 131.9, 130.0, 128.7, 128.3, 127.4, 115.1, 70.2. HRMS (EI-TOF) calcd for  $\text{C}_{14}\text{H}_{11}\text{DO}_2$  ( $\text{M}^+$ ) = 213.0900, found 213.0895.

#### Benzaldehyde-formyl-*dl* (**11**):

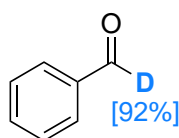

Prepared following the general procedure.  $^1\text{H}$  NMR spectrum showed 91% deuterium incorporation and quantitative yield (> 99%) with  $\text{CH}_2\text{Br}_2$  as an internal standard. Then the crude mixture was purified over silica gel

chromatography (hexane : diethyl ether = 20 : 1) to afford product as a colorless oil in 19.2 mg (90% yield).  $^1\text{H}$  NMR (500 MHz,  $\text{CDCl}_3$ )  $\delta$  = 10.0 (s, 0.08H), 7.92 – 7.81 (m, 2H), 7.63 (t,  $J$  = 7.5 Hz, 1H), 7.57 – 7.47 (m, 2H).  $^{13}\text{C}$  NMR (126 MHz,  $\text{CDCl}_3$ )  $\delta$  = 192.3 (CHO), 192.0 (t,  $J$  = 26.7 Hz, COD), 136.3, 134.4, 129.7, 129.0. HRMS (EI-TOF) calcd for  $\text{C}_7\text{H}_5\text{DO}$  ( $\text{M}^+$ ) = 107.0481, found 107.0480.

#### Thiophen-2-carbaldehyde-formyl-*d*1 (**12**):

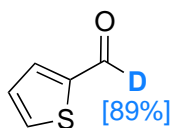

Prepared following the general procedure.  $^1\text{H}$  NMR spectrum showed 89% deuterium incorporation and quantitative yield (> 99%) with  $\text{CH}_2\text{Br}_2$  as an internal standard. Then the compound was purified over silica gel chromatography (hexane : diethyl ether = 20 : 1) to afford product as a colorless oil in 18.8 mg (83% yield).  $^1\text{H}$  NMR (500 MHz,  $\text{CDCl}_3$ )  $\delta$  = 9.94 (s, 0.11H), 7.82 – 7.70 (m, 2H), 7.21 (t,  $J$  = 4.0 Hz, 1H).  $^{13}\text{C}$  NMR (126 MHz,  $\text{CDCl}_3$ )  $\delta$  = 182.9 (COH), 182.7 (t,  $J$  = 27.3 Hz, COD), 144.0 (t,  $J$  = 4.7 Hz), 136.2, 135.1, 128.3. HRMS (EI-TOF) calcd for  $\text{C}_5\text{H}_3\text{DOS}$  ( $\text{M}^+$ ) = 113.0040, found 113.0042.

#### 3-Phenylpropionaldehyde-formyl-*d*1 (**13**):

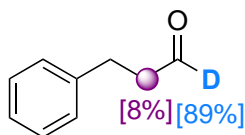

Prepared following the general procedure.  $^1\text{H}$  NMR spectrum showed 89% deuterium incorporation on formyl group, 8% deuterium incorporation on the  $\alpha$ -carbonyl  $\text{C}(\text{sp}^3)\text{-H}$  bonds and 99% yield using  $\text{CH}_2\text{Br}_2$  as an internal standard. Then the crude mixture was purified over silica gel chromatography (hexane : diethyl ether = 20 : 1) to afford product as a colorless oil in 22.9 mg (85% yield).  $^1\text{H}$  NMR (500 MHz,  $\text{CDCl}_3$ )  $\delta$  = 9.82 (t,  $J$  = 1.5 Hz, 0.11H), 7.31 (td,  $J$  = 7.5, 1.5 Hz, 2H), 7.22 (t,  $J$  = 7.5 Hz, 3H), 2.97 (t,  $J$  = 7.5 Hz, 2H), 2.82 – 2.74 (m, 1.84H).  $^{13}\text{C}$  NMR (126 MHz,  $\text{CDCl}_3$ )  $\delta$  = 201.5 (COH), 201.2 (t,  $J$  = 26.5 Hz, COD), 140.3, 128.5, 128.2, 126.2, 45.0 (t,  $J$  = 3.7 Hz), 28.0. D NMR (77 MHz,  $\text{CHCl}_3$ )  $\delta$  = 9.82. HRMS (EI-TOF) calcd for  $\text{C}_9\text{H}_9\text{DO}$  ( $\text{M}^+$ ) = 135.0789, found 135.0788.

#### *p*-tert-Butyl- $\alpha$ -methylhydrocinnamic aldehyde-formyl-*d*1 (**14**):

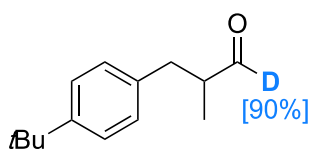

Prepared following the general procedure.  $^1\text{H}$  NMR spectrum showed 90% deuterium incorporation and 99% NMR yield using  $\text{CH}_2\text{Br}_2$  as an internal standard. Then the compound was purified over silica gel chromatography (hexane : diethyl ether = 20 : 1) to afford product as a colorless oil in 31.6 mg (77% yield).  $^1\text{H}$  NMR (500 MHz,  $\text{CDCl}_3$ )  $\delta$  = 9.72 (m, 0.10H), 7.32 (d,  $J$  = 8.5 Hz, 2H), 7.11 (d,  $J$  = 8.5 Hz, 2H), 3.06 (dd,  $J$  = 13.5, 6.0 Hz, 1H), 2.72 – 2.62 (m, 1H), 2.59

(dd,  $J = 13.5, 8.0$  Hz, 1H), 1.32 (s, 9H), 1.10 (d,  $J = 7.0$  Hz, 3H).  $^{13}\text{C}$  NMR (126 MHz,  $\text{CDCl}_3$ )  $\delta = 204.6$  (COH), 204.3 (t,  $J = 26.3$  Hz, COD), 149.2, 135.7, 128.6, 125.4, 48.0 - 47.8 (m), 36.1, 34.4, 31.3, 13.2. D NMR (77 MHz,  $\text{CHCl}_3$ )  $\delta = 9.73$ . HRMS (EI-TOF) calcd for  $\text{C}_{14}\text{H}_{19}\text{DO}$  ( $\text{M}^+$ ) = 205.1571, found 205.1570.

**6-Oxo-6-phenylhexanal-formyl-*dl* (15):**

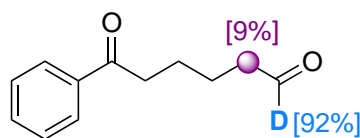

Prepared following the general procedure.  $^1\text{H}$  NMR spectrum showed 92% deuterium incorporation on formyl group, 9% deuterium incorporation on the  $\alpha$ -carbonyl  $\text{C}(\text{sp}^3)\text{-H}$  bonds and quantitative yield ( $> 99\%$ ) using  $\text{CH}_2\text{Br}_2$  as an internal standard. Then the crude mixture was purified over silica gel chromatography (hexane : diethyl ether = 20 : 1) to afford product as a colorless solid in 29.0 mg (76% yield).  $^1\text{H}$  NMR (500 MHz,  $\text{CDCl}_3$ )  $\delta = 9.78$  (s, 0.08H), 8.01 – 7.82 (m, 2H), 7.64 – 7.52 (m, 1H), 7.52 – 7.38 (m, 2H), 3.00 (t,  $J = 7.0$  Hz, 2H), 2.49 (t,  $J = 7.0$  Hz, 1.83H), 1.87 – 1.60 (m, 4H).  $^{13}\text{C}$  NMR (126 MHz,  $\text{CDCl}_3$ )  $\delta = 202.2, 201.9$  (t,  $J = 26.5$  Hz), 136.8, 133.0, 128.6, 128.0, 43.7 - 43.5 (m), 38.1, 23.6, 21.6. D NMR (77 MHz,  $\text{CHCl}_3$ )  $\delta = 9.78, 2.44$ . HRMS (EI-TOF) calcd for  $\text{C}_{12}\text{H}_{13}\text{DO}_2$  ( $\text{M}^+$ ) = 191.1051, found 191.1058.

***n*-Hexanal-formyl-*dl* (16):**

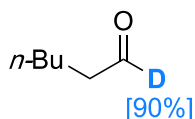

Prepared following the general procedure by using  $\text{CD}_3\text{CN}$  (1.0 M) instead of  $\text{CH}_3\text{CN}$  (1.0 M).  $^1\text{H}$  NMR spectrum showed 90% deuterium incorporation and 90% yield using  $\text{CH}_2\text{Br}_2$  as an internal standard.  $^1\text{H}$  NMR (500 MHz,  $\text{CD}_3\text{CN}$ )  $\delta = 9.64$  (m, 0.10H), 2.42 – 2.31 (m, 1H), 2.29 – 2.19 (m, 1H), 1.59 – 1.50 (m, 2H), 1.28 – 1.24 (m, 4H), 0.86 (t,  $J = 7.0$  Hz, 3H). HRMS (EI-TOF) calcd for  $\text{C}_{12}\text{H}_{13}\text{DO}_2$  ( $\text{M}^+$ ) = 101.0945, found 101.0950.

**4-Methoxybenzaldehyde-formyl-*dl* (17):**

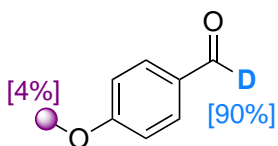

Prepared following the general procedure.  $^1\text{H}$  NMR showed 90% deuterium incorporation on the formyl  $\text{C-H}$  bond, 4% deuterium incorporation on the  $\alpha$ -oxy  $\text{C}(\text{sp}^3)\text{-H}$  bonds and 99% yield using  $\text{CH}_2\text{Br}_2$  as an internal standard. Then the crude mixture was purified over silica gel chromatography (hexane : diethyl ether = 20 : 1) to afford product as a colorless oil in 24.9 mg (90% yield).  $^1\text{H}$  NMR (500 MHz,  $\text{CDCl}_3$ )  $\delta = 9.87$  (s, 0.10H), 7.85 – 7.75 (m, 2H), 6.99 (d,  $J = 9.0$  Hz, 2H), 3.90 – 3.85 (m, 2.87H).  $^{13}\text{C}$  NMR (126 MHz,  $\text{CDCl}_3$ )  $\delta = 190.8$  (COH), 190.4

(t,  $J = 26.5$  Hz, COD), 164.6, 131.9, 129.8 (t,  $J = 3.8$  Hz), 114.3, 55.5 (OCH<sub>3</sub>), 55.2 (t,  $J = 22.6$  Hz, OCH<sub>2</sub>D). HRMS (EI-TOF) calcd for C<sub>8</sub>H<sub>7</sub>DO<sub>2</sub> (M<sup>+</sup>) = 137.0579, found 137.0574.

#### 4-(1,1-*d*3-Methoxy)-benzaldehyde-formyl-*d*1 (**17'**):

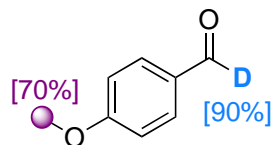

Prepared following the general procedure for 48 h with the addition of TBAB (20 mol%). <sup>1</sup>H NMR spectrum showed 90% deuterium incorporation on the formyl C-H bond, 70% deuterium incorporation on the *α*-oxy C(sp<sup>3</sup>)-H bonds and 99% yield using CH<sub>2</sub>Br<sub>2</sub> as an internal standard. Then the crude mixture was purified over silica gel chromatography (hexane : diethyl ether = 20 : 1) to afford product as a colorless oil in 26.0 mg (92% yield). <sup>1</sup>H NMR (500 MHz, CDCl<sub>3</sub>)  $\delta$  = 9.88 (s, 0.10H), 7.84 (d,  $J = 8.5$  Hz, 2H), 7.01 (d,  $J = 8.5$  Hz, 2H), 3.90 – 3.83 (m, 0.89H). <sup>13</sup>C NMR (126 MHz, CDCl<sub>3</sub>)  $\delta$  = 190.8 (COH), 190.5 (t,  $J = 26.5$  Hz, COD), 164.6, 132.0, 129.9 (t,  $J = 3.7$  Hz), 114.3, 55.7 – 54.6 (m). HRMS (EI-TOF) calcd for C<sub>8</sub>H<sub>4</sub>D<sub>4</sub>O<sub>2</sub> (M<sup>+</sup>) = 140.0770, found 140.0763.

#### 4-(1,1-*d*2-Ethoxy)-benzaldehyde-formyl-*d*1 (**18**):

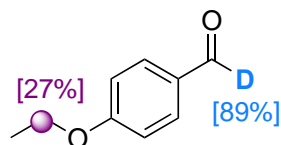

Prepared following the general procedure. <sup>1</sup>H NMR spectrum showed 88% deuterium incorporation on the formyl C-H bond, 27% deuterium incorporation on the *α*-oxy C(sp<sup>3</sup>)-H bonds and 94% yield using CH<sub>2</sub>Br<sub>2</sub> as an internal standard. Then the crude mixture was purified over silica gel chromatography (hexane : diethyl ether = 20 : 1) to afford product as a colorless oil in 27.3 mg (90% yield). <sup>1</sup>H NMR (500 MHz, CDCl<sub>3</sub>)  $\delta$  = 9.85 (s, 0.11H), 7.83 – 7.78 (m, 2H), 7.00 – 6.95 (m, 2H), 4.13 – 4.04 (m, 1.46H), 1.43 (t,  $J = 8.5$  Hz, 3H). <sup>13</sup>C NMR (126 MHz, CDCl<sub>3</sub>)  $\delta$  = 190.7 (COH), 190.4 (t,  $J = 26.3$  Hz, COD), 164.0, 131.9, 129.6 (t,  $J = 7.6$  Hz), 114.6, 63.8 (OCH<sub>2</sub>CH<sub>3</sub>), 63.5 (t,  $J = 22.0$  Hz, OCHDCH<sub>3</sub>), 14.6 – 14.3 (m). HRMS (EI-TOF) calcd for C<sub>9</sub>H<sub>8</sub>D<sub>2</sub>O<sub>2</sub> (M<sup>+</sup>) = 152.0803, found 152.0799.

#### 4-(1,1-*d*2-Ethoxy)-benzaldehyde-formyl-*d*1 (**18'**):

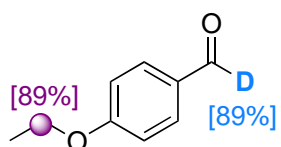

Prepared following the general procedure for 48 h with the addition of TBAB (20 mol%). <sup>1</sup>H NMR spectrum showed 89% deuterium incorporation on the formyl C-H bond, 89% deuterium incorporation on the *α*-oxy C(sp<sup>3</sup>)-H bonds and 99% yield using CH<sub>2</sub>Br<sub>2</sub> as an internal standard. Then the compound was purified over silica gel chromatography (hexane : diethyl ether = 20 : 1) to afford product as a colorless oil in 28.7 mg (95% yield). <sup>1</sup>H NMR (500 MHz, CDCl<sub>3</sub>)  $\delta$  = 9.87

(s, 0.11H), 7.81 (d,  $J = 8.5$  Hz, 2H), 6.97 (d,  $J = 8.5$  Hz, 2H), 4.14 – 4.06 (m, 0.23H), 1.45 – 1.38 (m, 3H).  $^{13}\text{C}$  NMR (126 MHz,  $\text{CDCl}_3$ )  $\delta = 190.8$  (COH), 190.5 (t,  $J = 26.3$  Hz, COD), 164.0, 131.9, 129.7 (t,  $J = 7.6$  Hz), 114.7, 63.8 – 63.0 (m), 14.5 – 14.3 (m). HRMS (EI-TOF) calcd for  $\text{C}_9\text{H}_7\text{D}_3\text{O}_2$  ( $\text{M}^+$ ) = 153.0864, found 153.0860.

#### 4-(Methylthio)benzaldehyde-formyl-*d*1 (**19**):

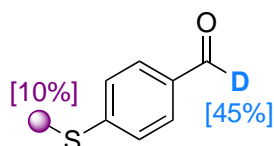

Prepared following the general procedure.  $^1\text{H}$  NMR spectrum showed 45% deuterium incorporation on the formyl C-H bond, 10% deuterium incorporation on the  $\alpha$ -thioxy  $\text{C}(\text{sp}^3)$ -H bonds and 99% yield using  $\text{CH}_2\text{Br}_2$  as an internal standard. Then the crude mixture was purified over silica gel chromatography (hexane : diethyl ether = 20 : 1) to afford product as a colorless oil in 30.4 mg (99% yield).  $^1\text{H}$  NMR (500 MHz,  $\text{CDCl}_3$ )  $\delta = 9.89$  (s, 0.55H), 7.77 – 7.69 (m, 2H), 7.32 – 7.27 (m, 2H), 2.55 – 2.41 (m, 2.71 H).  $^{13}\text{C}$  NMR (126 MHz,  $\text{CDCl}_3$ )  $\delta = 191.1$  (COH), 190.8 (t,  $J = 26.3$  Hz, COD), 147.8, 132.8, 129.8, 125.0, 14.5. HRMS (EI-TOF) calcd for  $\text{C}_8\text{H}_6\text{D}_2\text{SO}$  ( $\text{M}^+$ ) = 154.0410, found 154.0406.

#### 4-(1,1,1-*d*3-Methylthio)benzaldehyde-formyl-*d*1 (**19'**):

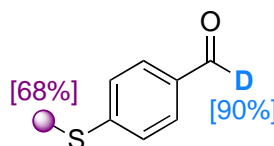

Prepared following the general procedure for 48 h with the addition of TBAB (20 mol%).  $^1\text{H}$  NMR spectrum showed 90% deuterium incorporation on the formyl C-H bond, 68% deuterium incorporation on the  $\alpha$ -thioxy  $\text{C}(\text{sp}^3)$ -H bonds and 99% yield using  $\text{CH}_2\text{Br}_2$  as an internal standard. Then the crude mixture was purified over silica gel chromatography (hexane : diethyl ether = 20 : 1) to afford product as a colorless oil in 30.3 mg (99% yield).  $^1\text{H}$  NMR (500 MHz,  $\text{CDCl}_3$ )  $\delta = 9.90$  (s, 0.10H), 7.75 (d,  $J = 8.5$  Hz, 2H), 7.30 (d,  $J = 8.5$  Hz, 2H), 2.52 – 2.47 (m, 0.95H).  $^{13}\text{C}$  NMR (126 MHz,  $\text{CDCl}_3$ )  $\delta = 191.1$  (COH), 190.8 (t,  $J = 26.3$  Hz, COD), 147.8, 132.8, 129.9, 125.1, 14.6 – 13.8 (m). HRMS (EI-TOF) calcd for  $\text{C}_8\text{H}_4\text{D}_4\text{SO}$  ( $\text{M}^+$ ) = 156.0541, found 156.0537.

#### 4-Methylbenzaldehyde-formyl-*d*1 (**20**):

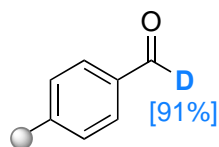

Prepared following the general procedure.  $^1\text{H}$  NMR spectrum showed 91% deuterium incorporation on the formyl C-H bond, less than 2% deuterium incorporation on the benzyl  $\text{C}(\text{sp}^3)$ -H bonds and 97% yield using  $\text{CH}_2\text{Br}_2$  as an internal standard. Then the crude mixture was purified over silica gel chromatography (hexane : diethyl ether = 20 : 1) to afford product as a colorless oil in 21.8 mg (90% yield).  $^1\text{H}$  NMR (500 MHz,  $\text{CDCl}_3$ )  $\delta = 9.96$  (s, 0.09H), 7.77 (d,  $J = 9.5$  Hz, 2H), 7.32 (d,  $J = 9.5$  Hz, 2H),

2.43 (s, 3H).  $^{13}\text{C}$  NMR (126 MHz,  $\text{CDCl}_3$ )  $\delta$  = 191.9 (COH), 191.6 (t,  $J$  = 33.0 Hz, COD), 145.5, 134.1 (t,  $J$  = 4.3 Hz), 129.8, 129.7, 21.8. HRMS (EI-TOF) calcd for  $\text{C}_8\text{H}_7\text{DO}$  ( $\text{M}^+$ ) = 121.0632, found 121.0631.

4-(1,1,1- $d_3$ -Methyl)benzaldehyde-formyl- $d_1$  (**20'**):

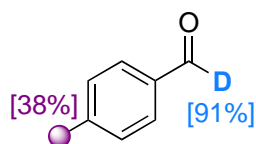

Prepared following the general procedure for 48 h with the addition of TBAB (20 mol%).  $^1\text{H}$  NMR spectrum showed 91% deuterium incorporation on the formyl C-H bond, 38% deuterium incorporation on the benzyl  $\text{C}(\text{sp}^3)\text{-H}$  bonds and 95% yield using  $\text{CH}_2\text{Br}_2$  as an internal standard. Then compound was purified over silica gel chromatography (hexane : diethyl ether = 20 : 1) to afford product as a colorless oil in 20.6 mg (85% yield).  $^1\text{H}$  NMR (500 MHz,  $\text{CDCl}_3$ )  $\delta$  = 9.96 (s, 0.09H), 7.78 (d,  $J$  = 8.0 Hz, 2H), 7.32 (d,  $J$  = 8.0 Hz, 2H), 2.43 (s, 1.87H).  $^{13}\text{C}$  NMR (126 MHz,  $\text{CDCl}_3$ )  $\delta$  = 192.0 (COH), 191.7 (t,  $J$  = 33.0 Hz, COD), 145.6 – 145.4 (m), 134.3 – 134.0 (m), 129.8, 129.7, 21.9 ( $\text{CH}_3$ ), 21.6 (t,  $J$  = 18.0 Hz,  $\text{CH}_2\text{D}$ ). HRMS (EI-TOF) calcd for  $\text{C}_8\text{H}_6\text{D}_2\text{O}$  ( $\text{M}^+$ ) = 122.0691, found 122.0681.

5-Methylhexan-2-yl-5- $d$  benzoate (**22**):

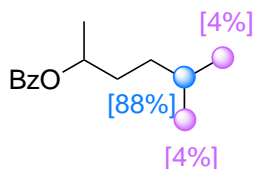

Prepared following the general procedure for 24 h with the addition of TBAB (20 mol%). The crude mixture was purified over silica gel chromatography (hexane : diethyl ether = 20 : 1) to afford product as a colorless oil in 41.0 mg (93% yield).  $^1\text{H}$  NMR spectrum showed 88% deuterium incorporation on the tertiary  $\text{C}(\text{sp}^3)\text{-H}$  bond.  $^1\text{H}$  NMR (500 MHz,  $\text{CDCl}_3$ )  $\delta$  = 8.16 – 8.00 (m, 2H), 7.66 – 7.49 (m, 1H), 7.48 – 7.40 (m, 2H), 5.22 – 5.10 (m, 1H), 1.82 – 1.68 (m, 1H), 1.67 – 1.58 (m, 1.12H), 1.34 (d,  $J$  = 6.5 Hz, 3H), 1.32 – 1.20 (m, 2H), 0.96 – 0.84 (m, 5.74H).  $^{13}\text{C}$  NMR (126 MHz,  $\text{CDCl}_3$ )  $\delta$  = 166.2, 132.6, 131.0, 129.5, 128.2, 72.0, 34.4, 33.8, 27.9 ( $\text{CH}(\text{CH}_3)_2$ ), 27.4 (t,  $J$  = 19.3 Hz,  $\text{CD}(\text{CH}_3)_2$ ), 22.4, 22.4, 20.0. D NMR (77 MHz,  $\text{CHCl}_3$ )  $\delta$  = 1.53, 0.89. HRMS (EI-TOF) calcd for  $\text{C}_{14}\text{H}_{19}\text{DO}_2$  ( $\text{M}^+$ ) = 221.1521, found 221.1528.

4-Methylpentyl-4- $d$  benzoate (**23**):

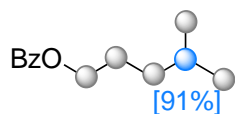

Prepared following the general procedure for 24 h with the addition of TBAB (20 mol%). The crude mixture was purified over silica gel chromatography (hexane : diethyl ether = 20 : 1) to afford product as a colorless oil in 38.0 mg (92% yield).  $^1\text{H}$  NMR spectrum showed 91% deuterium incorporation on the tertiary  $\text{C}(\text{sp}^3)\text{-H}$  bond.  $^1\text{H}$  NMR (500 MHz,  $\text{CDCl}_3$ )  $\delta$  = 8.09 – 7.99 (m, 2H), 7.59 –

7.52 (m, 1H), 7.43 (t,  $J = 7.5$  Hz, 2H), 4.31 (t,  $J = 7.0$  Hz, 2H), 1.83 – 1.70 (m, 2H), 1.64 – 1.60 (m, 0.09H), 1.38 – 1.25 (m, 2H), 0.94 – 0.87 (m, 6H).  $^{13}\text{C}$  NMR (126 MHz,  $\text{CDCl}_3$ )  $\delta = 166.7$ , 132.8, 130.5, 129.5, 128.3, 65.4, 35.0, 27.7 ( $\text{CH}(\text{CH}_3)_2$ ), 27.2 (t,  $J = 19.2$  Hz,  $\text{CD}(\text{CH}_3)_2$ ), 26.6, 22.4. D NMR (77 MHz,  $\text{CHCl}_3$ )  $\delta = 4.32$ , 1.77, 1.61, 1.32, 0.93. HRMS (EI-TOF) calcd for  $\text{C}_{13}\text{H}_{17}\text{DO}_2$  ( $\text{M}^+$ ) = 207.1364, found 207.1364.

### 3-Methylbutyl-3-*d* benzoate (**24**):

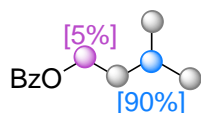

Prepared following the general procedure for 24 h with the addition of TBAB (20 mol%). The crude mixture was purified over silica gel chromatography (hexane : diethyl ether = 20 : 1) to afford product as a colorless oil in 38.1 mg (99% yield).  $^1\text{H}$  NMR spectrum showed 90% deuterium incorporation on the tertiary  $\text{C}(\text{sp}^3)\text{-H}$  bond.  $^1\text{H}$  NMR (500 MHz,  $\text{CDCl}_3$ )  $\delta = 8.40$  (d,  $J = 8.0$  Hz, 2H), 7.55 (t,  $J = 8.0$  Hz, 1H), 7.44 (t,  $J = 8.0$  Hz, 2H), 4.36 (t,  $J = 6.5$  Hz, 1.89H), 1.82 – 1.76 (m, 0.10H), 1.66 (t,  $J = 6.5$  Hz, 2H), 0.97 (s, 6H).  $^{13}\text{C}$  NMR (126 MHz,  $\text{CDCl}_3$ )  $\delta = 166.7$ , 132.8, 130.5, 129.5, 128.3, 63.6, 37.3, 25.1 ( $\text{CH}(\text{CH}_3)_2$ ), 24.7 ( $J = 19.5$  Hz,  $\text{CD}(\text{CH}_3)_2$ ), 22.4. D NMR (77 MHz,  $\text{CHCl}_3$ )  $\delta = 4.33$ , 1.77, 1.64, 0.96. HRMS (EI-TOF) calcd for  $\text{C}_{12}\text{H}_{15}\text{DO}_2$  ( $\text{M}^+$ ) = 193.1208, found 193.1207.

### 2-(3-Methylbutyl-1,3-*d*<sub>2</sub>)isoindoline-1,3-dione (**25**):

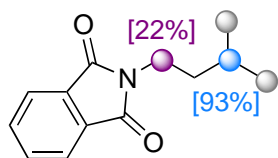

Prepared following the general procedure for 48 h with the addition of TBAB (20 mol%). The crude mixture was purified over silica gel chromatography (hexane : diethyl ether = 20 : 1) to afford product as a colorless oil in 34.5 mg (80% yield).  $^1\text{H}$  NMR spectrum showed 93% deuterium incorporation on the tertiary  $\text{C}(\text{sp}^3)\text{-H}$  bond, and 22% deuterium incorporation on the  $\alpha$ -amide  $\text{C}(\text{sp}^3)\text{-H}$  bonds.  $^1\text{H}$  NMR (500 MHz,  $\text{CDCl}_3$ )  $\delta = 7.84$  – 7.79 (m, 2H), 7.72 – 7.58 (m, 2H), 3.81 – 3.42 (m, 1.57H), 1.66 – 1.60 (m, 0.07H), 1.58 – 1.47 (m, 2H), 0.96 – 0.92 (m, 6H).  $^{13}\text{C}$  NMR (126 MHz,  $\text{CDCl}_3$ )  $\delta = 168.4$ , 133.8, 132.2, 123.1, 37.4 – 37.0 (m), 36.4, 25.9 – 25.2 (m), 22.2. D NMR (77 MHz,  $\text{CHCl}_3$ )  $\delta = 3.67$ , 1.58, 0.94. HRMS (EI-TOF) calcd for  $\text{C}_{13}\text{H}_{13}\text{D}_2\text{NO}_2$  ( $\text{M}^+$ ) = 219.1223, found 219.1219.

### 4-Methylcyclohexyl-4-*d* benzoate (**26**):

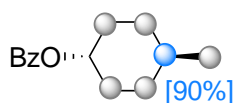

Prepared following the general procedure for 24 h with the addition of TBAB (20 mol%). The crude mixture was purified over silica gel chromatography (hexane : diethyl ether = 20 : 1) to afford product as a colorless oil in 39.2 mg

(90% yield).  $^1\text{H}$  NMR spectrum showed 90% deuterium incorporation on the tertiary  $\text{C}(\text{sp}^3)\text{-H}$  bond. *cis* : *trans* = 1 : 3, Major one, *trans*:  $^1\text{H}$  NMR (500 MHz,  $\text{CDCl}_3$ )  $\delta$  = 8.12 – 7.97 (m, 2H), 7.59 – 7.48 (m, 1H), 7.48 – 7.37 (m, 2H), 4.95 – 4.81 (m, 1H), 1.99 – 1.89 (m, 2H), 1.82 – 1.31 (m, 4.1H), 1.18 – 1.02 (m, 1.15H), 0.94 – 0.82 (m, 3H).  $^{13}\text{C}$  NMR (126 MHz,  $\text{CDCl}_3$ )  $\delta$  = 166.1, 132.6, 130.9, 129.5, 128.2, 73.9, 32.9 – 32.6 (m), 31.6 – 31.5 (m), 29.7 – 29.5 (m), 21.7. Minor one, *cis*,  $^1\text{H}$  NMR (500 MHz,  $\text{CDCl}_3$ )  $\delta$  = 8.12 – 7.97 (m, 2H), 7.59 – 7.48 (m, 1H), 7.48 – 7.37 (m, 2H), 5.35 – 5.18 (m, 1H), 1.99 – 1.89 (m, 2H), 1.82 – 1.31 (m, 4.1H), 1.18 – 1.02 (m, 1.15H), 1.09 – 0.95 (m, 3H).  $^{13}\text{C}$  NMR (126 MHz,  $\text{CDCl}_3$ )  $\delta$  = 166.0, 132.6, 131.1, 129.6, 128.2, 70.3, 32.6 – 32.2 (m), 31.2 – 30.7 (m), 29.4 – 29.0 (m), 22.0. D NMR (77 MHz,  $\text{CHCl}_3$ )  $\delta$  = 2.05, 1.73, 1.53, 1.46, 1.37, 1.07, 0.90. HRMS (EI-TOF) calcd for  $\text{C}_{14}\text{H}_{15}\text{D}_3\text{O}_2$  ( $\text{M}^+$ ) = 221.1490, found 221.1485.

#### 4-Methyl-1-phenylpentan-1-one-4-*d* (**27**):

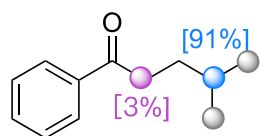

Prepared following the general procedure for 24 h with the addition of TBAB (20 mol%). The crude mixture was purified over silica gel chromatography (hexane : diethyl ether = 20 : 1) to afford product as a colorless oil in 19.7 mg (56% yield).  $^1\text{H}$  NMR spectrum showed 91% deuterium incorporation on the tertiary  $\text{C}(\text{sp}^3)\text{-H}$  bond.  $^1\text{H}$  NMR (500 MHz,  $\text{CDCl}_3$ )  $\delta$  = 7.96 (d,  $J$  = 7.5 Hz, 2H), 7.55 (t,  $J$  = 7.5 Hz, 1H), 7.46 (t,  $J$  = 7.5 Hz, 2H), 3.02 – 2.87 (m, 1.95H), 1.64 – 1.46 (m, 2.09H), 0.97 – 0.89 (m, 6H).  $^{13}\text{C}$  NMR (126 MHz,  $\text{CDCl}_3$ )  $\delta$  = 200.8, 137.1, 132.8, 128.5, 128.0, 36.7 – 36.5 (m), 33.1, 27.4 – 27.0 (m), 22.4 – 22.2 (m). D NMR (77 MHz,  $\text{CHCl}_3$ )  $\delta$  = 2.93, 1.60, 0.92. HRMS (EI-TOF) calcd for  $\text{C}_{12}\text{H}_{15}\text{DO}$  ( $\text{M}^+$ ) = 177.1258, found 177.1261.

#### 1-(4-(Methoxy-*d*<sub>3</sub>)phenyl)-4-methylpentan-1-one-4-*d* (**28**):

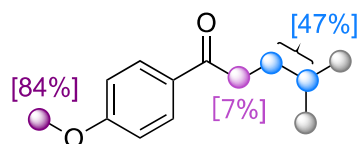

Prepared following the general procedure for 48 h with the addition of TBAB (20 mol%). The crude mixture was purified over silica gel chromatography (hexane : diethyl ether = 20 : 1) to afford product as a colorless oil in 37.2 mg (90% yield).  $^1\text{H}$  NMR spectrum showed average 47% deuterium incorporation on the tertiary  $\text{C}(\text{sp}^3)\text{-H}$  bond and adjacent secondary  $\text{C}(\text{sp}^3)\text{-H}$  bonds which overlap with each other on the  $^1\text{H}$  NMR spectrum, 7% deuterium incorporation on the  $\alpha$ -oxy carbonyl bonds and 84% deuterium incorporation on the  $\alpha$ -oxy  $\text{C}(\text{sp}^3)\text{-H}$  bonds.  $^1\text{H}$  NMR (500 MHz,  $\text{CDCl}_3$ )  $\delta$  = 7.99 – 7.86 (m, 2H), 6.96 – 6.86 (m, 2H), 3.86 – 3.78 (m, 0.48H), 2.94 – 2.81 (m, 1.86H), 1.65 – 1.52 (m, 1.60H), 0.96 – 0.87 (m, 6H).  $^{13}\text{C}$  NMR (126

MHz, CDCl<sub>3</sub>)  $\delta$  = 199.3, 163.2, 130.3, 130.1, 113.6, 55.3 – 54.5 (m), 36.3 – 36.0 (m), 33.4 – 32.6 (m), 28.1 – 26.3 (m), 23.5 – 22.0 (m). D NMR (77 MHz, CHCl<sub>3</sub>)  $\delta$  = 3.82, 2.89, 1.60, 0.92. HRMS (EI-TOF) calcd for C<sub>13</sub>H<sub>14</sub>D<sub>4</sub>O<sub>2</sub> (M<sup>+</sup>) = 210.1552, found 210.1548.

10-Bromo-2-methyldecan-5-one-2-*d* (**29**):

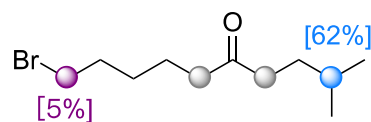

Prepared following the general procedure for 24 h with the addition of TBAB (20 mol%). The crude mixture was purified over silica gel chromatography (hexane : diethyl ether = 20 : 1) to afford product as a colorless oil in 49.2 mg (99% yield). <sup>1</sup>H NMR spectrum showed 5% deuterium incorporation on the  $\alpha$ -bromide C(sp<sup>3</sup>)-H bonds and 62% deuterium incorporation on the tertiary C(sp<sup>3</sup>)-H bond. <sup>1</sup>H NMR (500 MHz, CDCl<sub>3</sub>)  $\delta$  = 3.40 (t, *J* = 7.0 Hz, 1.90H), 2.44 – 2.35 (m, 4H), 1.92 – 1.82 (m, 2H), 1.62 – 1.52 (m, 2H), 1.52 – 1.50 (m, 0.38H), 1.49 – 1.36 (m, 4H), 0.89 – 0.86 (m, 6H). <sup>13</sup>C NMR (126 MHz, CDCl<sub>3</sub>)  $\delta$  = 211.2, 42.4 – 42.2 (m), 40.9, 40.9, 33.6, 32.7 – 32.4 (m), 27.8, 27.7, 22.9 – 22.6 (m), 22.4, 22.2. D NMR (77 MHz, CHCl<sub>3</sub>)  $\delta$  = 3.39, 2.39, 1.50. HRMS (EI-TOF) calcd for C<sub>11</sub>H<sub>20</sub>DBrO (M<sup>+</sup>) = 249.0833, found 249.0823.

2-Methyl-10-phenoxydecan-5-one-2,10,10-*d*<sub>3</sub> (**30**):

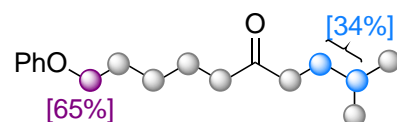

Prepared following the general procedure for 24 h with the addition of TBAB (20 mol%). The crude mixture was purified over silica gel chromatography (hexane : diethyl ether = 20 : 1) to afford product as a colorless oil in 51.9 mg (99% yield). <sup>1</sup>H NMR spectrum showed average 34% deuterium incorporation on the tertiary C(sp<sup>3</sup>)-H adjacent secondary C(sp<sup>3</sup>)-H bonds which overlap with each other in the <sup>1</sup>H NMR spectrum, and 65% deuterium incorporation on the  $\alpha$ -oxy C(sp<sup>3</sup>)-H bonds. <sup>1</sup>H NMR (500 MHz, CDCl<sub>3</sub>)  $\delta$  = 7.32 – 7.25 (m, 2H), 6.94 (t, *J* = 7.5 Hz, 1H), 6.89 (d, *J* = 8.5 Hz, 2H), 4.00 – 3.92 (m, 0.70H), 2.47 – 2.34 (m, 4H), 1.82 – 1.74 (m, 2H), 1.68 – 1.61 (m, 1.97H), 1.51 – 1.41 (m, 4H), 0.92 – 0.88 (m, 5.89H). <sup>13</sup>C NMR (126 MHz, CDCl<sub>3</sub>)  $\delta$  = 211.4, 159.0, 129.4, 120.5, 114.4, 67.5 – 67.1 (m), 42.6 – 42.3 (m), 40.9 – 40.6 (m), 32.7 – 32.4 (m), 29.1 (CH<sub>2</sub>CH(CH<sub>3</sub>)<sub>2</sub>), 28.8 (t, *J* = 11.8 Hz, CHDCH(CH<sub>3</sub>)<sub>2</sub>), 27.7 (CH(CH<sub>3</sub>)<sub>2</sub>), 27.2 (t, *J* = 19.4 Hz, CD(CH<sub>3</sub>)<sub>2</sub>), 25.8 – 25.4 (m), 23.7 – 23.2 (m), 22.5 – 22.1 (m). D NMR (77 MHz, CHCl<sub>3</sub>)  $\delta$  = 3.95, 2.44, 1.78, 1.63, 1.53, 0.90. HRMS (EI-TOF) calcd for C<sub>17</sub>H<sub>21</sub>D<sub>5</sub>O<sub>2</sub> (M<sup>+</sup>) = 267.2241, found 267.2239.

2-Methyl-10-(phenylthio)decan-5-one-2,10,10-*d*<sub>3</sub> (**31**):

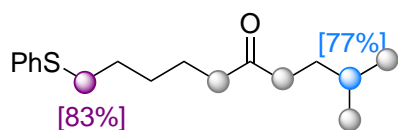

Prepared following the general procedure for 24 h with the addition of TBAB (20 mol%). The crude mixture was purified over silica gel chromatography (hexane : diethyl ether = 20 :

1) to afford product as a colorless oil in 52.8 mg (95% yield). <sup>1</sup>H NMR spectrum showed 77% deuterium incorporation on the tertiary C(sp<sup>3</sup>)-H bond, and 83% deuterium incorporation on the *α*-thioxy C(sp<sup>3</sup>)-H bonds. <sup>1</sup>H NMR (500 MHz, CDCl<sub>3</sub>) δ = 7.33 – 7.29 (m, 2H), 7.29 – 7.25 (m, 2H), 7.18 – 7.13 (m, 1H), 2.92 – 2.86 (m, 0.34H), 2.42 – 2.31 (m, 3.91H), 1.67 – 1.60 (m, 2H), 1.60 – 1.53 (m, 2H), 1.52 – 1.48 (m, 0.23H), 1.46 – 1.35 (m, 4H), 0.90 – 0.84 (m, 6H). <sup>13</sup>C NMR (126 MHz, CDCl<sub>3</sub>) δ = 211.3, 136.7, 128.9, 128.8, 125.7, 42.4, 40.9, 40.8, 32.6 - 32.5 (m), 28.8 - 28.6 (m), 28.2, 27.7, 23.3, 22.3, 22.2. D NMR (77 MHz, CHCl<sub>3</sub>) δ = 2.88, 2.36, 1.49, 0.89, HRMS (EI-TOF) calcd for C<sub>17</sub>H<sub>23</sub>D<sub>3</sub>OS (M<sup>+</sup>) = 281.1887, found 281.1881.

4-(Methyl-*d*<sub>3</sub>)-1,1'-biphenyl (**32**):

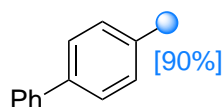

Prepared following the general procedure for 48 h with the addition of TBAB (20 mol%). The crude mixture was purified over silica gel chromatography (hexane : diethyl ether = 20 : 1) to afford product as a colorless solid in 33.2 mg (99% yield), and <sup>1</sup>H NMR spectrum showed 81% deuterium incorporation on the benzylic C(sp<sup>3</sup>)-H bonds. After second running with the 81% deuteride product, the deuterium incorporation was improved to 90%. <sup>1</sup>H NMR (500 MHz, CDCl<sub>3</sub>) δ = 7.78 – 7.66 (m, 2H), 7.65 – 7.59 (m, 2H), 7.58 – 7.51 (m, 2H), 7.51 – 7.42 (m, 1H), 7.41 – 7.32 (m, 2H), 2.54 – 2.43 (m, 0.30H). <sup>13</sup>C NMR (126 MHz, CDCl<sub>3</sub>) δ = 141.1, 138.3, 136.9, 129.4, 128.7, 126.9, 126.9, 21.1 – 20.1 (m). HRMS (EI-TOF) calcd for C<sub>13</sub>H<sub>9</sub>D<sub>3</sub> (M<sup>+</sup>) = 171.1122, found 171.1114.

4,4,5,5-Tetramethyl-2-(4-(methyl-*d*<sub>3</sub>)phenyl)-1,3,2-dioxaborolane (**33**):

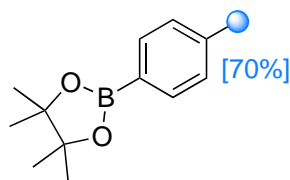

Prepared following the general procedure for 48 h with the addition of TBAB (20 mol%). The crude mixture was purified over silica gel chromatography (hexane : diethyl ether = 5 : 1) to afford product as colorless solid in 43.1 mg (99% yield), and the <sup>1</sup>H NMR spectrum

showed 70% deuterium incorporation on the benzylic C(sp<sup>3</sup>)-H bonds. <sup>1</sup>H NMR (500 MHz, CDCl<sub>3</sub>) δ = 7.71(d, *J* = 6.5 Hz, 2H), 7.19 (d, *J* = 6.5 Hz, 2H), 2.38 – 2.32 (m, 0.90H), 1.35 (s, 12H). <sup>13</sup>C NMR (126 MHz, CDCl<sub>3</sub>) δ = 141.3, 134.8, 128.5, 83.6, 24.8, 21.7 – 21.5 (m). HRMS (EI-TOF) calcd for C<sub>13</sub>H<sub>16</sub>D<sub>3</sub>BO<sub>2</sub> (M<sup>+</sup>) = 221.1661, found 221.1657.

1-Bromo-4-(methoxy-*d*<sub>3</sub>)benzene (**21**):

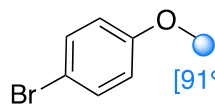

Prepared following the general procedure for 48 h with the addition of TBAB (20 mol%). The crude mixture was purified over silica gel chromatography (hexane : diethyl ether = 10 : 1) to afford product as a colorless solid in 31.8 mg (85% yield), and the <sup>1</sup>H NMR spectrum showed 91% deuterium incorporation on the *α*-oxy C(sp<sup>3</sup>)-H bonds. <sup>1</sup>H NMR (500 MHz, CDCl<sub>3</sub>) δ = 7.52 – 7.34 (m, 2H), 6.91 – 6.73 (m, 2H), 3.79 – 3.72 (m, 0.27H). <sup>13</sup>C NMR (126 MHz, CDCl<sub>3</sub>) δ = 158.7, 132.2, 115.7, 112.7, 55.2 – 54.6 (m). HRMS (EI-TOF) calcd for C<sub>7</sub>H<sub>4</sub>D<sub>3</sub>BrO (M<sup>+</sup>) = 188.9861, found 188.9859.

((Propan-2-yl-2-*d*)oxy)benzene (**34**):

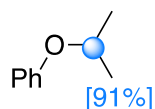

Prepared following the general procedure for 48 h with the addition of TBAB (20 mol%). The yield was detected to be 99% using CH<sub>2</sub>Br<sub>2</sub> as internal standard. Finally, the crude mixture was purified over silica gel chromatography (pure hexane) to afford product as a colorless oil which still contained some diethyl ether, but <sup>1</sup>H NMR spectrum was clean enough to show 91% deuterium incorporation on the *α*-oxy C(sp<sup>3</sup>)-H bonds. <sup>1</sup>H NMR (500 MHz, CDCl<sub>3</sub>) δ = 7.33 – 7.27 (m, 2H), 7.00 – 6.90 (m, 3H), 4.61 – 4.53 (m, 0.09H), 1.39 – 1.35 (m, 6H). <sup>13</sup>C NMR (126 MHz, CDCl<sub>3</sub>) δ = 157.8, 129.4, 120.4, 115.8, 70.0 – 69.0 (m), 21.9. HRMS (EI-TOF) calcd for C<sub>9</sub>H<sub>11</sub>DO (M<sup>+</sup>) = 137.0945, found 137.0947.

Chroman-4-one-2,2-*d*<sub>2</sub> (**35**):

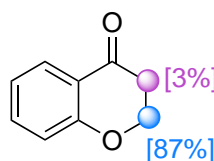

Prepared following the general procedure for 48 h with the addition of TBAB (20 mol%). The crude mixture was purified over silica gel chromatography (hexane : diethyl ether = 10 : 1) to afford product as a colorless oil in 26.7 mg (90% yield), and <sup>1</sup>H NMR spectrum showed 3% deuterium incorporation on the *α*-carbonyl C(sp<sup>3</sup>)-H bonds and 87% deuterium incorporation on the *α*-oxy C(sp<sup>3</sup>)-H bonds. <sup>1</sup>H NMR (500 MHz, CDCl<sub>3</sub>) δ = 7.89 (dd, *J* = 7.5, 2.0 Hz, 1H), 7.49 – 7.43 (m, 1H), 7.04 – 6.97 (m, 1H), 6.96 (d, *J* = 8.0 Hz, 1H), 4.55 – 4.47 (m, 0.27 H), 2.79 (s, 1.94H). <sup>13</sup>C NMR (126 MHz, CDCl<sub>3</sub>) δ = 191.8, 161.8, 135.9, 127.1, 121.3, 117.8, 66.9 – 66.0 (m), 37.5. D NMR (500 MHz, CHCl<sub>3</sub>) δ = 4.50, 2.78. HRMS (EI-TOF) calcd for C<sub>9</sub>H<sub>6</sub>D<sub>2</sub>O<sub>2</sub> (M<sup>+</sup>) = 150.0644, found 150.0643.

(4-(Methoxy-*d*<sub>3</sub>)phenyl)(4-(trifluoromethyl)phenyl)methanone (**36**):

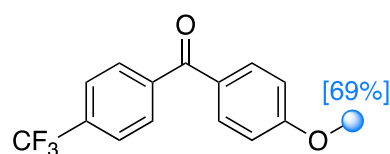

Prepared following the general procedure for 48 h with the addition of TBAB (20 mol%) and C<sub>6</sub>H<sub>5</sub>CF<sub>3</sub> (0.2 mL). The crude mixture was purified over silica gel chromatography (hexane : diethyl ether = 10 : 1) to afford a colorless solid in 55.4 mg (99% yield), and <sup>1</sup>H NMR spectrum showed 69% deuterium incorporation on the *α*-oxy C(sp<sup>3</sup>)-H bonds. <sup>1</sup>H NMR (500 MHz, CDCl<sub>3</sub>) δ = 7.88 – 7.77 (m, 4H), 7.73 (d, *J* = 8.5 Hz, 2H), 6.97 (d, *J* = 8.5 Hz, 2H), 3.91 – 3.83 (m, 0.92H). <sup>13</sup>C NMR (126 MHz, CDCl<sub>3</sub>) δ = 194.2, 163.7, 141.5, 133.2 (q, *J* = 32.8 Hz), 132.6, 129.7, 129.3, 125.2 (q, *J* = 3.8 Hz), 123.7 (q, *J* = 272.8 Hz), 113.8, 55.5 – 54.7 (m). HRMS (EI-TOF) calcd for C<sub>15</sub>H<sub>8</sub>D<sub>3</sub>F<sub>3</sub>O<sub>2</sub> (M<sup>+</sup>) = 283.0894, found 283.0896.

*tert*-Butyl (methyl-*d*<sub>3</sub>)(phenyl)carbamate (**37**):

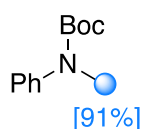

Prepared following the general procedure for 48 h with the addition of TBAB (20 mol%). The crude mixture was purified over silica gel chromatography (hexane : diethyl ether = 5 : 1) to afford product as a colorless oil in 37.7 mg (90% yield), and <sup>1</sup>H NMR spectrum showed 91% deuterium incorporation on the *α*-amide C(sp<sup>3</sup>)-H bonds. <sup>1</sup>H NMR (500 MHz, CDCl<sub>3</sub>) δ = 7.34 – 7.29 (m, 2H), 7.23 (d, *J* = 8.0 Hz, 2H), 7.17 – 7.13 (m, 1H), 3.26 – 3.21 (m, 0.26 H), 1.45 (s, 9H). <sup>13</sup>C NMR (126 MHz, CDCl<sub>3</sub>) δ = 154.8, 143.8, 128.5, 125.5, 125.3, 80.2, 37.2 – 36.3 (m), 28.3. HRMS (EI-TOF) calcd for C<sub>12</sub>H<sub>14</sub>D<sub>3</sub>NO<sub>2</sub> (M<sup>+</sup>) = 210.1442, found 210.1446.

*tert*-Butyl indoline-1-carboxylate-2,2,3-*d*<sub>3</sub> (**38**):

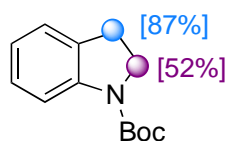

Prepared following the general procedure for 48 h with the addition of TBAB (20 mol%). The crude mixture was purified over silica gel chromatography (hexane : diethyl ether = 5 : 1) to afford product as a colorless solid in 37.2 mg (85% yield), and <sup>1</sup>H NMR spectrum showed 87% deuterium incorporation on the benzylic C(sp<sup>3</sup>)-H bonds and 52% deuterium incorporation on the *α*-amide C(sp<sup>3</sup>)-H bonds. <sup>1</sup>H NMR (500 MHz, CDCl<sub>3</sub>) δ = 8.01 – 7.43 (m, 1H), 7.21 – 7.06 (m, 2H), 6.92 (t, *J* = 7.5 Hz, 1H), 3.96 (bs, 0.96H), 3.11 – 3.02 (m, 0.27H), 1.57 (s, 9H). <sup>13</sup>C NMR (126 MHz, CDCl<sub>3</sub>) δ = 152.6, 143.3 – 143.0 (m), 132.1 – 130.0 (m), 127.3, 124.9 – 124.3 (m), 122.0, 114.6, 80.2 – 77.5 (m), 47.5 – 47.2 (m), 28.4, 27.1 – 26.2 (m). HRMS (EI-TOF) calcd for C<sub>13</sub>H<sub>14</sub>D<sub>3</sub>NO<sub>2</sub> (M<sup>+</sup>) = 222.1442, found 222.1437.

#### 4-Phenylbutanoic-4,4-*d*<sub>2</sub> acid (**39**):

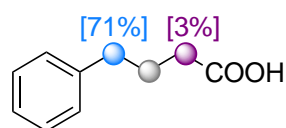

Prepared following the general procedure for 48 h with the addition of TBAB (20 mol%). The crude mixture was purified over silica gel chromatography (dichloromethane : methanol = 20 : 1) to afford product as a colorless solid in 29.5 mg (90% yield), and <sup>1</sup>H NMR spectrum showed 71% deuterium incorporation on the benzylic C(sp<sup>3</sup>)-H bonds and 3% deuterium incorporation on the *α*-carboxylic acid C(sp<sup>3</sup>)-H bonds. <sup>1</sup>H NMR (500 MHz, CDCl<sub>3</sub>) δ = 7.30 (t, *J* = 7.5 Hz, 2H), 7.23 – 7.15 (m, 3H), 2.73 – 2.63 (m, 0.58H), 2.39 (t, *J* = 7.0 Hz, 2H), 2.02 – 1.83 (m, 1.94H). <sup>13</sup>C NMR (126 MHz, CDCl<sub>3</sub>) δ = 179.9, 141.2 – 141.0 (m), 128.4, 128.4, 126.0, 35.0 – 34.3 (m), 33.3 – 33.0 (m), 26.1 – 26.0 (m). D NMR (77 MHz, CHCl<sub>3</sub>) δ = 2.68, 2.40, 1.98. HRMS (EI-TOF) calcd for C<sub>10</sub>H<sub>10</sub>D<sub>2</sub>O<sub>2</sub> (M<sup>+</sup>) = 166.0957, found 166.0955.

#### Methyl (2*S*)-2-(4-(2-methylpropyl-1,2-*d*<sub>2</sub>)phenyl)propanoate (**40**):

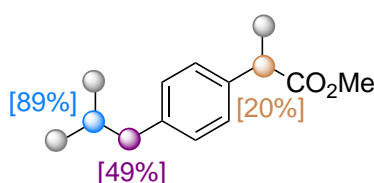

Prepared following the general procedure for 24 h with the addition of TBAB (20 mol%). The crude mixture was purified over silica gel chromatography (hexane : diethyl ether = 50 : 1) to afford product as a colorless solid in 40.5 mg (92% yield), and <sup>1</sup>H NMR spectrum showed 89% deuterium incorporation on the isopropyl C(sp<sup>3</sup>)-H bond, 49% deuterium incorporation on the benzylic C(sp<sup>3</sup>)-H bonds and 20% deuterium incorporation on the *α*-ester C(sp<sup>3</sup>)-H bonds. <sup>1</sup>H NMR (500 MHz, CDCl<sub>3</sub>) δ = 7.21 (d, *J* = 8.0 Hz, 2H), 7.10 (d, *J* = 8.0 Hz, 2H), 3.71 (m, 0.80H), 3.66 (s, 3H), 2.47 – 2.40 (m, 1.03H), 1.91 – 1.80 (m, 0.11H), 1.53 – 1.43 (m, 3H), 0.94 – 0.86 (m, 6H). <sup>13</sup>C NMR (126 MHz, CDCl<sub>3</sub>) δ = 175.2, 140.5, 137.7, 129.3, 127.1, 51.9, 45.0, 30.1 – 29.8 (m), 29.7 – 29.4 (m), 22.2, 18.6, 18.5. D NMR (77 MHz, CHCl<sub>3</sub>) δ = 3.70, 2.44, 1.84, 1.50, 0.91. HRMS (EI-TOF) calcd for C<sub>14</sub>H<sub>17</sub>D<sub>3</sub>O<sub>2</sub> (M<sup>+</sup>) = 223.1646, found 223.1647.

#### Methyl 2,2-dimethyl-5-(2-(methyl-*d*)-5-(methyl-*d*<sub>2</sub>)phenoxy)pentanoate-5-*d* (**41**):

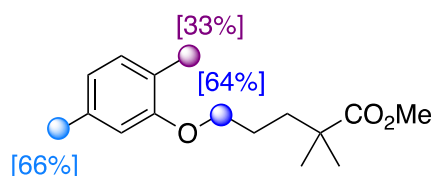

Prepared following the general procedure for 48 h with the addition of TBAB (20 mol%). The crude mixture was purified over silica gel chromatography (hexane : diethyl ether = 10 : 1) to afford product as a colorless solid in 47.7 mg (90% yield), and <sup>1</sup>H NMR spectrum showed 66%, 33% deuterium incorporation on the benzylic C(sp<sup>3</sup>)-H bonds individually, and 64% deuterium incorporation on the *α*-oxy C(sp<sup>3</sup>)-

H bonds.  $^1\text{H}$  NMR (500 MHz,  $\text{CDCl}_3$ )  $\delta$  = 7.01 (d,  $J$  = 7.5 Hz, 1H), 6.67 (d,  $J$  = 7.5 Hz, 1H), 6.62 (s, 1H), 3.96 – 3.88 (m, 0.72H), 3.68 (s, 3H), 2.33 – 2.27 (m, 1.02H), 2.21 – 2.15 (m, 1.69H), 1.77 – 1.69 (m, 4H), 1.24 (s, 6H).  $^{13}\text{C}$  NMR (126 MHz,  $\text{CDCl}_3$ )  $\delta$  = 178.3, 156.9, 136.3, 130.2, 123.6 – 123.3 (m), 120.6, 111.9, 67.5 (dd,  $J$  = 44.7, 23.2 Hz), 51.7, 42.1, 37.1 – 37.0 (m), 25.1, 25.0, 21.4 – 20.5 (m), 15.8 – 15.1 (m). D NMR (77 MHz,  $\text{CHCl}_3$ )  $\delta$  = 3.92, 2.32 – 2.93, 2.20 – 2.17. HRMS (EI-TOF) calcd for  $\text{C}_{16}\text{H}_{19}\text{D}_5\text{O}_3$  ( $\text{M}^+$ ) = 269.2034, found 269.2038.

(4-(Methyl- $d_3$ )-1H-pyrazol-1-yl)(phenyl)methanone (**42**):

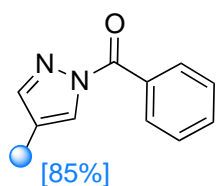

Prepared following the general procedure for 48 h with the addition of TBAB (20 mol%). The crude mixture was purified by silica gel chromatography (hexane : diethyl ether = 5 : 1) to afford product as a colorless solid in 33.1 mg (89% yield), and  $^1\text{H}$  NMR spectrum showed 85% deuterium incorporation on the benzylic  $\text{C}(\text{sp}^3)\text{-H}$  bonds.  $^1\text{H}$  NMR (500 MHz,  $\text{CDCl}_3$ )  $\delta$  = 8.18 (s, 1H), 8.09 – 8.05 (m, 2H), 7.63 (s, 1H), 7.61 – 7.55 (m, 1H), 7.52 – 7.45 (m, 2H), 2.15 – 2.11 (m, 0.44H).  $^{13}\text{C}$  NMR (126 MHz,  $\text{CDCl}_3$ )  $\delta$  = 166.3, 146.2, 132.7, 131.7, 131.3, 128.1, 128.0, 120.2, 8.5 – 8.3 (m). HRMS (EI-TOF) calcd for  $\text{C}_{11}\text{H}_7\text{D}_3\text{N}_2\text{O}$  ( $\text{M}^+$ ) = 189.0976, found 189.0973.

5-(Methyl- $d_3$ )-2-phenyl-2,4-dihydro-3H-pyrazol-3-one (**43**):

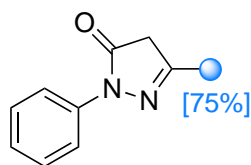

Prepared following the general procedure for 48 h with the addition of TBAB (20 mol%). The crude mixture was purified over silica gel chromatography (hexane : diethyl ether = 5 : 1) to afford the product as a colorless solid in 34.6 mg (99% yield), and  $^1\text{H}$  NMR spectrum showed 75% deuterium incorporation on the methyl  $\text{C}(\text{sp}^3)\text{-H}$  bonds.  $^1\text{H}$  NMR (500 MHz,  $\text{CDCl}_3$ )  $\delta$  = 7.85 (d,  $J$  = 8.0 Hz, 2H), 7.38 (t,  $J$  = 8.0 Hz, 2H), 7.17 (t,  $J$  = 8.0 Hz, 1H), 3.41 (s, 2H), 2.19 – 2.12 (m, 0.74H).  $^{13}\text{C}$  NMR (126 MHz,  $\text{CDCl}_3$ )  $\delta$  = 170.5, 156.2, 138.0, 128.8, 125.0, 118.8, 43.0, 16.7 – 16.2 (m). HRMS (EI-TOF) calcd for  $\text{C}_{10}\text{H}_7\text{D}_3\text{N}_2\text{O}$  ( $\text{M}^+$ ) = 177.0976, found 177.0972.

5-(Methyl- $d_3$ )-1-phenylpyridin-2(1H)-one (**44**):

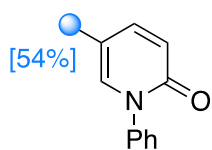

Prepared following the general procedure for 48 h with the addition of TBAB (20 mol%) after mixing with trifluoroacetic acid (3.0 equiv) in  $\text{D}_2\text{O}$ . The crude mixture was purified over silica gel chromatography (hexane :

diethyl ether = 2 : 1) to afford the product as a colorless solid in 31.7 mg (85% yield), and  $^1\text{H}$  NMR spectrum showed 54% deuterium incorporation on the benzylic  $\text{C}(\text{sp}^3)\text{-H}$  bonds.  $^1\text{H}$  NMR (500 MHz,  $\text{CDCl}_3$ )  $\delta$  = 7.52 – 7.46 (m, 2H), 7.44 – 7.39 (m, 1H), 7.38– 7.35 (m, 2H), 7.27 (dd,  $J$  = 7.0, 2.5 Hz, 1H), 7.12 (s, 1H), 6.62 (d,  $J$  = 9.5 Hz, 1H), 2.12 – 2.06 (m, 1.39H).  $^{13}\text{C}$  NMR (126 MHz,  $\text{CDCl}_3$ )  $\delta$  = 161.7, 142.5, 141.1, 135.3, 129.3, 128.3, 126.5, 121.4, 114.8 – 114.7 (m), 17.0 – 16.4 (m). HRMS (EI-TOF) calcd for  $\text{C}_{12}\text{H}_8\text{D}_3\text{NO}$  ( $\text{M}^+$ ) = 188.1023, found 188.1018.

### 3-Butylisobenzofuran-1(3*H*)-one-3-*d* (**45**):

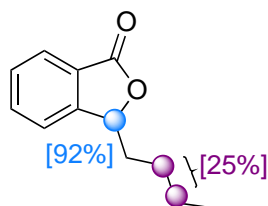

Prepared following the general procedure for 24 h with the addition of TBAB (20 mol%). The crude mixture was purified over silica gel chromatography (hexane : diethyl ether = 2 : 1) to afford product as a colorless oil in 32.0 mg (84% yield), and  $^1\text{H}$  NMR spectrum showed 92% deuterium incorporation on the  $\alpha$ -oxy  $\text{C}(\text{sp}^3)\text{-H}$  bond, and 25% deuterium incorporation on the indicated secondary  $\text{C}(\text{sp}^3)\text{-H}$  bonds.  $^1\text{H}$  NMR (500 MHz,  $\text{CDCl}_3$ )  $\delta$  = 7.87 (d,  $J$  = 8.0 Hz, 1H), 7.65 (t,  $J$  = 8.0 Hz, 1H), 7.50 (t,  $J$  = 7.5 Hz, 1H), 7.43 (d,  $J$  = 7.5 Hz, 1H), 5.46 (dd,  $J$  = 7.5, 4.0 Hz, 0.08H), 2.08 – 1.95 (m, 1H), 1.80 – 1.68 (m, 1H), 1.53 – 1.25 (m, 3.00H), 0.98 – 0.82 (m, 3H).  $^{13}\text{C}$  NMR (126 MHz,  $\text{CDCl}_3$ )  $\delta$  = 170.6, 150.0, 133.9, 129.0, 126.1, 125.6, 121.7, 81.4 ( $\text{OCH}_n\text{Bu}$ ), 81.0 (t,  $J$  = 22.4 Hz,  $\text{OCD}_n\text{Bu}$ ), 34.4 – 34.1 (m), 26.8 – 26.2 (m), 22.5 – 20.8 (m), 13.9 – 13.1 (m). D NMR (77 MHz,  $\text{CHCl}_3$ )  $\delta$  = 5.45, 1.35. HRMS (EI-TOF) calcd for  $\text{C}_{12}\text{H}_{12}\text{D}_2\text{O}_2$  ( $\text{M}^+$ ) = 192.1114, found 192.1115.

### *N*-(2,6-bis(methyl-*d*<sub>3</sub>)phenyl)-2-(diethylamino)acetamide (**46**):

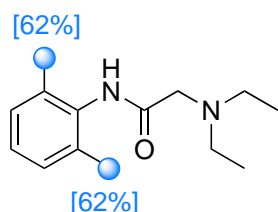

Prepared following the general procedure for 48 h with the addition of TBAB (20 mol%) after mixing with trifluoroacetic acid (3.0 equiv) in  $\text{D}_2\text{O}$ . The crude mixture was purified by silica gel chromatography (hexane : diethyl ether = 5 : 1) to afford product as a colorless solid in 39.4 mg (84% yield), and  $^1\text{H}$  NMR spectrum showed 62% deuterium incorporation on the benzylic  $\text{C}(\text{sp}^3)\text{-H}$  bonds.  $^1\text{H}$  NMR (500 MHz,  $\text{CDCl}_3$ )  $\delta$  = 8.92 (bs, 1H), 7.15 – 7.00 (m, 3H), 3.22 (s, 2H), 2.69 (q,  $J$  = 7.0 Hz, 4H), 2.24 – 2.18 (m, 2.31H), 1.14 (t,  $J$  = 7.0 Hz, 6H).  $^{13}\text{C}$  NMR (126 MHz,  $\text{CDCl}_3$ )  $\delta$  = 170.3, 135.0, 134.0, 128.2, 127.0, 57.5, 48.9, 18.6 – 18.0 (m), 12.6. D NMR (77 MHz,  $\text{CHCl}_3$ )  $\delta$  = 3.21 – 3.18. HRMS (EI-TOF) calcd for  $\text{C}_{14}\text{H}_{18}\text{D}_4\text{NO}$  ( $\text{M}^+$ ) = 238.1978, found 238.1970.

*N*-(1-(2,6-bis(methyl-*d*<sub>3</sub>)phenoxy)propan-2-yl)benzamide (**47**):

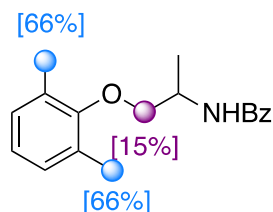

Prepared following the general procedure for 48 h with the addition of TBAB (20 mol%). The crude mixture was purified over silica gel chromatography (hexane : diethyl ether = 10 : 1) to afford product as a colorless solid in 49.4 mg (87% yield), and <sup>1</sup>H NMR spectrum showed 66% deuterium incorporation on the benzylic C(sp<sup>3</sup>)-H bonds, and 15% deuterium incorporation on the  $\alpha$ -oxy C(sp<sup>3</sup>)-H bonds. <sup>1</sup>H NMR (500 MHz, CDCl<sub>3</sub>)  $\delta$  = 7.87 – 7.78 (m, 2H), 7.56 – 7.48 (m, 1H), 7.48 – 7.32 (m, 2H), 7.01 (d, *J* = 7.5 Hz, 2H), 6.97 – 6.89 (m, 1H), 6.73 (bs, 1H), 4.62 – 4.49 (m, 1H), 3.98 – 3.88 (m, 0.88H), 3.87 – 3.76 (m, 0.83H), 2.29 – 2.21 (m, 2.03H), 1.53 (d, *J* = 7.0 Hz, 3H). <sup>13</sup>C NMR (126 MHz, CDCl<sub>3</sub>)  $\delta$  = 166.8, 154.8, 134.6, 131.4, 130.7 – 130.5 (m), 129.0, 128.5, 126.8, 124.1, 73.8, 45.8 – 45.6 (m), 17.8 – 17.6 (m), 16.2 – 15.2 (m). D NMR (77 MHz, CHCl<sub>3</sub>)  $\delta$  = 3.89 – 3.78, 2.24 – 2.20. HRMS (EI-TOF) calcd for C<sub>18</sub>H<sub>17</sub>D<sub>4</sub>NO<sub>2</sub> (M<sup>+</sup>) = 287.1818, found 287.1823.

4-Chloro-3,5-bis(methyl-*d*<sub>3</sub>)phenyl acetate (**48**):

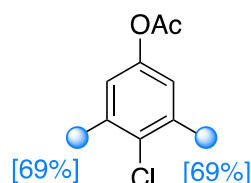

Prepared following the general procedure for 48 h with the addition of TBAB (20 mol%). The crude mixture was purified over silica gel chromatography (hexane : diethyl ether = 10 : 1) to afford product as a colorless oil in 39.2 mg (99% yield), and <sup>1</sup>H NMR spectrum showed 69% deuterium incorporation on the benzylic C(sp<sup>3</sup>)-H bonds. <sup>1</sup>H NMR (500 MHz, CDCl<sub>3</sub>)  $\delta$  = 6.82 (s, 2H), 2.38 – 2.32 (m, 1.87H), 2.28 (s, 3H). <sup>13</sup>C NMR (126 MHz, CDCl<sub>3</sub>)  $\delta$  = 169.5, 148.2, 137.4, 131.8, 121.3, 21.0, 20.7 – 20.1 (m). HRMS (EI-TOF) calcd for C<sub>10</sub>H<sub>7</sub>D<sub>4</sub>ClO<sub>2</sub> (M<sup>+</sup>) = 202.0693, found 202.0695.

Benzo[*d*][1,3]dioxol-5-yl-2,2-*d*<sub>2</sub> acetate (**49**):

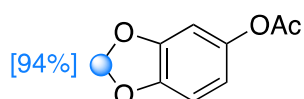

Prepared following the general procedure for 48 h with the addition of TBAB (20 mol%). The crude mixture was purified over silica gel chromatography (hexane : diethyl ether = 20 : 1) to afford product as a colorless solid in 34.2 mg (95% yield), and <sup>1</sup>H NMR spectrum showed 94% deuterium incorporation on the  $\alpha$ -oxy C(sp<sup>3</sup>)-H bonds. <sup>1</sup>H NMR (500 MHz, CDCl<sub>3</sub>)  $\delta$  = 6.77 (d, *J* = 9.0 Hz, 1H), 6.60 (d, *J* = 2.5 Hz, 1H), 6.52 (dd, *J* = 9.0, 2.5 Hz, 1H), 5.95 (s, 0.12H), 2.26 (s, 3H). <sup>13</sup>C NMR (126 MHz, CDCl<sub>3</sub>)  $\delta$  = 169.8, 148.0, 145.3, 144.9, 113.9, 107.9, 103.7, 101.6 – 100.8 (m), 20.9. HRMS (EI-TOF)

calcd for  $C_9H_6D_2O_4$  ( $M^+$ ) = 182.0543, found 182.0546.

(2*S*)-7-Chloro-2'-methoxy-4,6-bis(methoxy-*d*)-6'-methyl-3*H*-spiro[benzofuran-2,1'-cyclohexan]-2'-ene-3,4'-dione (**50**):

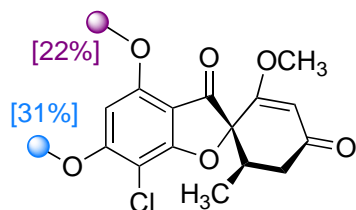

Prepared following the general procedure for 48 h with the addition of TBAB (20 mol%) and  $C_6H_5CF_3$  (0.2 mL). The crude mixture was purified over silica gel chromatography (dichloromethane : diethyl ether = 1 : 1) to afford product as a colorless solid in 70.1 mg (99% yield), and  $^1H$  NMR spectrum showed 31% and 22% deuterium incorporation on the *α*-oxy  $C(sp^3)$ -H bonds.  $^1H$  NMR (500 MHz,  $CDCl_3$ )  $\delta$  = 6.12 (s, 1H), 5.52 (s, 1H), 4.02 – 3.97 (m, 2.33H), 3.96 – 3.92 (m, 2.06H), 3.60 (s, 3H), 3.00 (dd,  $J$  = 16.5, 13.5 Hz, 1H), 2.86 – 2.77 (m, 1H), 2.41 (dd,  $J$  = 16.5, 4.5 Hz, 1H), 0.94 (d,  $J$  = 7.0 Hz, 3H).  $^{13}C$  NMR (126 MHz,  $CDCl_3$ )  $\delta$  = 197.0, 192.4, 170.7, 169.4, 164.6, 157.7, 104.8, 89.4, 57.2 – 56.0 (m), 40.0, 36.3, 14.2. D NMR (77 MHz,  $CHCl_3$ )  $\delta$  = 3.99. HRMS (EI-TOF) calcd for  $C_{17}H_{15}D_2ClO_6$  ( $M^+$ ) = 354.0834, found 354.0831.

*N*-((3*s*,5*s*,7*s*)-adamantan-1-yl)benzamide-*d*11 (**51**):

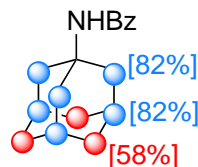

Prepared following the general procedure for 48 h with the addition of TBAB (20 mol%) and  $C_6H_5CF_3$  (0.2 mL). The crude mixture was purified over silica gel chromatography (hexane : diethyl ether = 10 : 1) to afford product as a colorless solid in 50.4 mg (99% yield), and  $^1H$  NMR spectrum showed 10.9 deuterium atoms per adamantyl molecule.  $^1H$  NMR (500 MHz,  $CDCl_3$ )  $\delta$  = 7.70 (d,  $J$  = 7.0 Hz, 2H), 7.48 – 7.41 (m, 1H), 7.41 – 7.33 (m, 2H), 5.84 (bs, 1H), 2.17 – 2.02 (m, 1.60H), 1.76 – 1.61 (m, 2.55H).  $^{13}C$  NMR (126 MHz,  $CDCl_3$ )  $\delta$  = 166.6 (166.5), 135.9, 130.9, 128.3, 126.6, 52.1 – 51.6 (m), 41.5 – 40.4 (m), 36.2 – 35.1 (m), 29.2 – 28.1 (m). D NMR (77 MHz,  $CHCl_3$ )  $\delta$  = 2.04, 1.64. HRMS (EI-TOF) calcd for  $C_{17}H_{10}D_{11}O$  ( $M^+$ ) = 266.2304, found 266.2294.

*N*-((1*r*,3*R*,5*S*,7*r*)-3,5-dimethyladamantan-1-yl)benzamide-*d*7 (**52**):

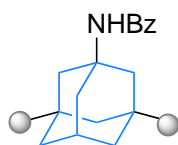

Prepared following the general procedure for 48 h with the addition of TBAB (20 mol%) and  $C_6H_5CF_3$  (0.2 mL). The crude mixture was purified over silica gel chromatography (hexane : diethyl ether = 10 : 1) to afford the product as a colorless solid in 56.1 mg (99% yield), and  $^1H$  NMR spectrum showed 6.7 deuterium atoms per adamantyl molecule.  $^1H$  NMR (500 MHz,  $CDCl_3$ )  $\delta$  = 7.75 – 7.65 (m, 2H), 7.47 – 7.41 (m, 1H), 7.41 – 7.33 (m, 2H), 5.90 (bs, 1H), 2.19 – 2.17 (m, 0.13H), 1.98 – 1.92 (m, 0.31H), 1.81

– 1.71 (m, 2.55H), 1.46 – 1.36 (m, 1.40 H), 1.36 – 1.25 (m, 1.56 H), 1.24 – 1.10 (m, 2.33H), 0.86 (s, 6H).  $^{13}\text{C}$  NMR (126 MHz,  $\text{CDCl}_3$ )  $\delta$  = 166.6, 135.8, 140.0, 128.3, 126.6, 53.6 (t,  $J$  = 8.3 Hz), 50.5, 47.5 – 46.9 (m), 42.5 – 41.8 (m), 40.7 – 40.5 (m), 32.3 (t,  $J$  = 10.5 Hz), 30.1, 39.8 – 29.0 (m). D NMR (77 MHz,  $\text{CHCl}_3$ )  $\delta$  = 2.12, 1.89, 1.73, 1.37, 1.28, 0.86. HRMS (EI-TOF) calcd for  $\text{C}_{19}\text{H}_{18}\text{D}_7\text{NO}$  ( $\text{M}^+$ ) = 290.2370, found 290.2366.

Phenyl (3*r*,5*r*,7*r*)-adamantane-1-carboxylate-*d*8 (**53**):

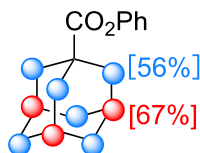

Prepared following the general procedure for 48 h with the addition of TBAB (20 mol%) and  $\text{C}_6\text{H}_5\text{CF}_3$  (0.2 mL). The crude mixture was purified over silica gel chromatography (hexane : diethyl ether = 8 : 1) to afford product as a colorless solid in 50.3 mg (98% yield), and  $^1\text{H}$  NMR spectrum showed 8.8 deuterium atoms per adamantyl molecule.  $^1\text{H}$  NMR (500 MHz,  $\text{CDCl}_3$ )  $\delta$  = 7.42 – 7.34 (m, 2H), 7.24 – 7.16 (m, 1H), 7.08 – 7.01 (m, 2H), 2.11 – 2.01 (m, 5.23H), 1.79 – 1.70 (m, 0.98H).  $^{13}\text{C}$  NMR (126 MHz,  $\text{CDCl}_3$ )  $\delta$  = 176.2, 151.1, 129.3, 125.4, 121.5, 40.9 – 40.6 (m), 38.7 – 38.3 (m), 38.3 – 37.8 (m), 36.0 – 35.1 (m), 27.9 – 26.6 (m). D NMR (77 MHz,  $\text{CHCl}_3$ )  $\delta$  = 2.10, 1.77. HRMS (EI-TOF) calcd for  $\text{C}_{17}\text{H}_{12}\text{D}_8\text{O}_2$  ( $\text{M}^+$ ) = 264.1960, found 264.1955.

2-(3,4-Bis(methoxy-*d*)phenyl)acetonitrile-*d*2 (**54**):

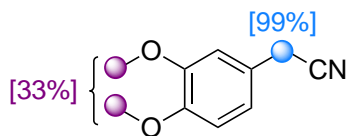

Prepared following the general procedure for 48 h with the addition of TBAB (20 mol%). The crude mixture was purified over silica gel chromatography (hexane : diethyl ether = 20 : 1) to afford product as a colorless solid in 31.2 mg (88% yield), and  $^1\text{H}$  NMR spectrum showed 33% deuterium incorporation on the *o*-oxy  $\text{C}(\text{sp}^3)\text{-H}$  bonds, and 99% deuterium incorporation on the benzylic  $\text{C}(\text{sp}^3)\text{-H}$  bonds.  $^1\text{H}$  NMR (500 MHz,  $\text{CDCl}_3$ )  $\delta$  = 6.87 – 6.81 (m, 2H), 6.80 (s, 1H), 3.90 – 3.80 (m, 4.02H), 3.70 (m, 0.01H).  $^{13}\text{C}$  NMR (126 MHz,  $\text{CDCl}_3$ )  $\delta$  = 149.3, 148.8, 122.0, 120.1, 118.1, 111.4, 110.9, 56.0 – 55.2 (m), 22.7 (t,  $J$  = 20.5 Hz,  $\text{OCH}_2\text{D}$ ). HRMS (EI-TOF) calcd for  $\text{C}_{10}\text{H}_7\text{D}_4\text{NO}_2$  ( $\text{M}^+$ ) = 181.1035, found 181.1027.

2,3-Dihydro-1*H*-inden-1-one-3,3-*d*2 (**55**):

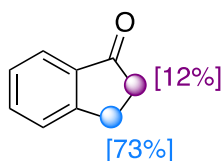

Prepared following the general procedure for 48 h with the addition of TBAB (20 mol%). The crude mixture was purified over silica gel chromatography (hexane : diethyl ether = 20 : 1) to afford product as a colorless solid in 25.2 mg (95% yield), and  $^1\text{H}$  NMR spectrum showed 73% deuterium

incorporation on the benzylic C(sp<sup>3</sup>)-H bonds, and 12% deuterium incorporation on the  $\alpha$ -carbonyl C(sp<sup>3</sup>)-H bonds. <sup>1</sup>H NMR (500 MHz, CDCl<sub>3</sub>)  $\delta$  = 7.75 (d,  $J$  = 8.0 Hz, 1H), 7.58 (dt,  $J$  = 7.5, 1.0 Hz, 1H), 7.48 (d,  $J$  = 7.5 Hz, 1H), 7.36 (t,  $J$  = 7.5 Hz, 1H), 3.18 – 3.08 (m, 0.55H), 2.71 – 2.62 (m, 1.76 H). <sup>13</sup>C NMR (126 MHz, CDCl<sub>3</sub>)  $\delta$  = 207.1, 155.0, 137.1, 134.5, 127.3, 126.7, 123.7, 36.1, 25.8 - 25.4 (m). HRMS (EI-TOF) calcd for C<sub>9</sub>H<sub>6</sub>D<sub>2</sub>O (M<sup>+</sup>) = 134.0695, found 134.0692.

**Methyl 2-(4-(methoxy-*d*<sub>3</sub>)phenyl)acetate-*d*<sub>2</sub> (56):**

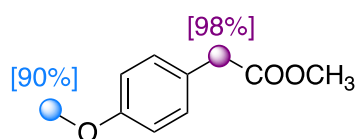

Prepared following the general procedure for 48 h with the addition of TBAB (20 mol%). The crude mixture was purified over silica gel chromatography (hexane : diethyl ether = 10 : 1)

to afford product as a colorless solid in 35.7 mg (99% yield), and <sup>1</sup>H NMR spectrum showed 90% deuterium incorporation on the  $\alpha$ -oxy C(sp<sup>3</sup>)-H bonds, and 98% deuterium incorporation on the  $\alpha$ -benzylic C(sp<sup>3</sup>)-H bonds. <sup>1</sup>H NMR (500 MHz, CDCl<sub>3</sub>)  $\delta$  = 7.20 (d,  $J$  = 8.0 Hz, 2H), 6.86 (d,  $J$  = 8.0 Hz, 2H), 3.79 – 3.74 (m, 0.30H), 3.68 (s, 3H), 3.57 – 3.53 (m, 0.04H). <sup>13</sup>C NMR (126 MHz, CDCl<sub>3</sub>)  $\delta$  = 172.3, 158.7, 130.2, 125.9, 113.9, 55.0 – 54.3 (m), 51.9, 40.0 – 39.3 (m). HRMS (EI-TOF) calcd for C<sub>10</sub>H<sub>7</sub>D<sub>5</sub>O<sub>3</sub> (M<sup>+</sup>) = 185.1095, found 185.1093.

**(2-(Methyl-*d*<sub>3</sub>)phenyl)(phenyl)methanone (57):**

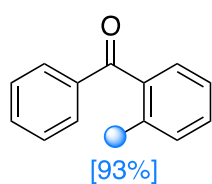

Prepared following the general procedure for 48 h with the addition of TBAB (20 mol%). The crude mixture was purified over silica gel chromatography (hexane : diethyl ether = 8 : 1) to afford product as a colorless oil in 37.7 mg (96% yield), and <sup>1</sup>H NMR spectrum showed 93%

deuterium incorporation on the benzylic C(sp<sup>3</sup>)-H bonds. <sup>1</sup>H NMR (500 MHz, CDCl<sub>3</sub>)  $\delta$  = 7.81 (d,  $J$  = 7.5 Hz, 2H), 7.62 – 7.54 (m, 1H), 7.49 – 7.43 (m, 2H), 7.42 – 7.37 (m, 1H), 7.34 – 7.28 (m, 2H), 7.27 – 7.22 (m, 1H), 2.34 – 2.29 (m, 0.21H). <sup>13</sup>C NMR (126 MHz, CDCl<sub>3</sub>)  $\delta$  = 198.6, 138.6, 137.7, 136.6, 133.1, 130.9, 130.2, 130.1, 128.5, 128.4, 125.1, 19.5 – 18.9 (m). HRMS (EI-TOF) calcd for C<sub>14</sub>H<sub>19</sub>D<sub>3</sub>O (M<sup>+</sup>) = 199.1071, found 199.1067.

2-Bromo-6-(methoxy-*d*<sub>2</sub>)naphthalene (**58**):

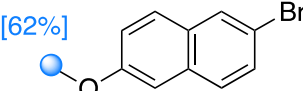 Prepared following the general procedure for 48 h with the addition of TBAB (20 mol%). The crude mixture was purified over silica gel chromatography (hexane : diethyl ether = 8 : 1) to afford product as a colorless solid in 46.7 mg (99% yield), and <sup>1</sup>H NMR spectrum showed 62% deuterium incorporation on the *α*-oxy C(sp<sup>3</sup>)-H bonds. <sup>1</sup>H NMR (500 MHz, CDCl<sub>3</sub>) δ = 7.91 (d, *J* = 2.0 Hz, 1H), 7.63 (d, *J* = 9.0 Hz, 1H), 7.60 (d, *J* = 9.0 Hz, 1H), 7.50 (dd, *J* = 9.0, 2.0 Hz, 1H), 7.16 (dd, *J* = 9.0, 2.0 Hz, 1H), 7.09 (s, 1H), 3.92 – 3.86 (m, 1.15H). <sup>13</sup>C NMR (126 MHz, CDCl<sub>3</sub>) δ = 157.8, 133.0, 130.0, 129.6, 129.6, 128.4, 128.3, 119.7, 117.0, 105.7, 52.3 – 54.7 (m). HRMS (EI-TOF) calcd for C<sub>11</sub>H<sub>7</sub>D<sub>2</sub>BrO (M<sup>+</sup>) = 239.9936, found 239.9939.

*N*-(2,6-bis(methyl-*d*<sub>3</sub>)phenyl)acetamide (**59**):

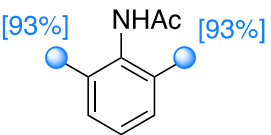 Prepared following the general procedure for 48 h with the addition of TBAB (20 mol%). The crude mixture was purified over silica gel chromatography (hexane : diethyl ether = 8 : 1) to afford product as a colorless solid in 32.2 mg (99% yield), and <sup>1</sup>H NMR spectrum showed 93% deuterium incorporation on the benzylic C(sp<sup>3</sup>)-H bonds. <sup>1</sup>H NMR (500 MHz, CDCl<sub>3</sub>) δ = 7.17 – 7.01 (m, 3H), 6.93 (br, 1H), 2.27 – 2.21 (m, 0.40H), 2.16 (s, 3H). <sup>13</sup>C NMR (126 MHz, CDCl<sub>3</sub>) δ = 168.7, 136.5, 135.4, 128.6, 128.2, 128.1, 127.3, 23.0, 18.4 – 17.5 (m). HRMS (EI-TOF) calcd for C<sub>10</sub>H<sub>7</sub>D<sub>6</sub>NO (M<sup>+</sup>) = 169.1368, found 169.1366.

## 7. Reference

- 1 I. B. Perry, T. F. Brewer, P. J. Sarver, D. M. Schultz, D. A. DiRocco and D. W. C. MacMillan, *Nature*, 2018, **560**, 70.
- 2 D. C. Miller, J. M. Ganley, A. J. Musacchio, T. C. Sherwood, W. R. Ewing and R. R. Knowles, *J. Am. Chem. Soc.*, 2019, **141**, 16590.
- 3 Y. Motoyama, M. Abe, K. Kamo, Y. Kosako and H. Nagashima, *Chem. Commun.*, 2008, 5321.

## 8. Copies of NMR spectra

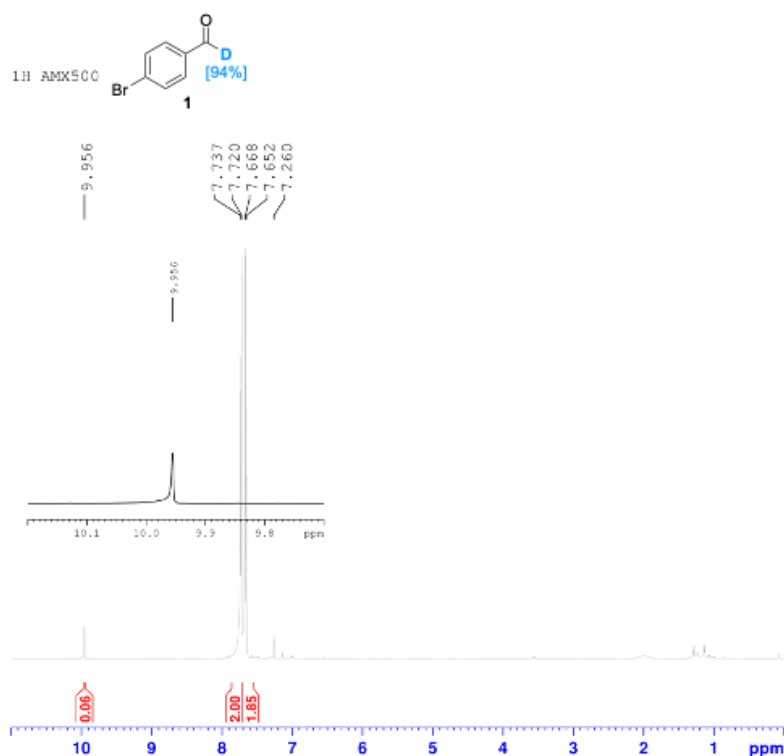

**BRUKER**

Current Data Parameters  
NAME yk0914-ky1-3197-2-1  
EXPNO 1  
PROCNO 1

F2 - Acquisition Parameters  
Date\_ 20190914  
Time 16.58  
INSTRUM spect  
PROBHD 5 mm PABBO MM/  
PULPROG zg30  
TD 32768  
SOLVENT CDCl3  
NS 8  
DS 0  
SWH 10330.578 Hz  
FIDRES 0.215264 Hz  
AQ 1.5859712 sec  
RG 114  
FW 48.400 usec  
DE 6.00 usec  
TE 296.0 K  
D1 1.00000000 sec  
TD0 1

===== CHANNEL f1 =====  
NUC1 <sup>1</sup>H  
P1 19.50 usec  
PL1 0.25 dB  
SFO1 500.1330885 MHz

F2 - Processing parameters  
SI 16384  
SF 500.1300130 MHz  
WDW EM  
SSB 0  
LB 0.30 Hz  
GB 0  
PC 1.00

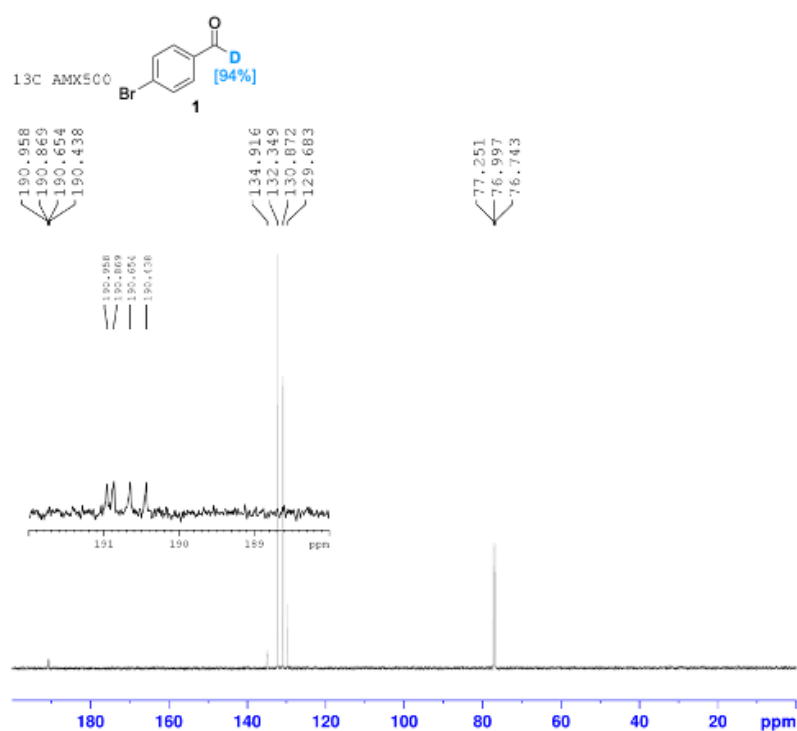

**BRUKER**

Current Data Parameters  
NAME yk0914-ky1-3197-2-1  
EXPNO 2  
PROCNO 1

F2 - Acquisition Parameters  
Date\_ 20190914  
Time 17.00  
INSTRUM spect  
PROBHD 5 mm PABBO MM/  
PULPROG zgpg30  
TD 65536  
SOLVENT CDCl3  
NS 93  
DS 0  
SWH 30030.029 Hz  
FIDRES 0.458222 Hz  
AQ 1.0911744 sec  
RG 10384  
FW 16.650 usec  
DE 6.00 usec  
TE 297.0 K  
D1 2.00000000 sec  
d11 0.03000000 sec  
DELTA 1.89999998 sec  
TD0 20

===== CHANNEL f1 =====  
NUC1 <sup>13</sup>C  
P1 8.90 usec  
PL1 0 dB  
SFO1 125.7709936 MHz

===== CHANNEL f2 =====  
CPDPRG2 waltz16  
NUC2 <sup>1</sup>H  
PCPD2 80.00 usec  
PL2 0.25 dB  
PL12 17.89 dB  
PL13 15.83 dB  
SFO2 500.1320005 MHz

F2 - Processing parameters  
SI 32768  
SF 125.7578006 MHz  
WDW EM  
SSB 0  
LB 1.00 Hz  
GB 0  
PC 1.40

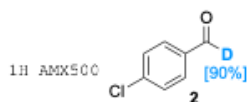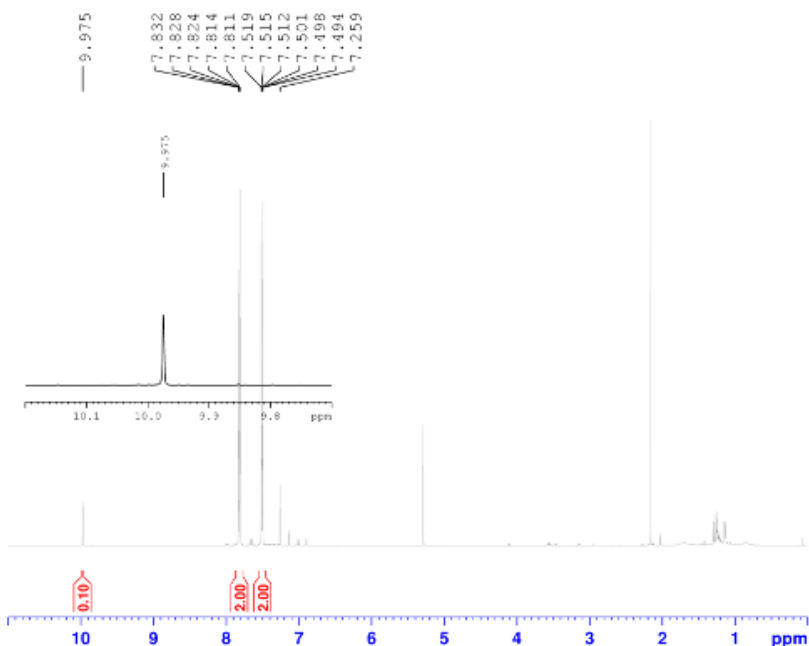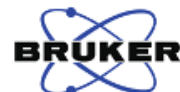

Current Data Parameters  
NAME yk0109-ky1-3180-1-1  
EXPNO 1  
PROCNO 1

F2 - Acquisition Parameters  
Date\_ 2020109  
Time 16.51  
INSTRUM spect  
PROBHD 5 mm PABBO BB/  
PULPROG zgpg30  
TD 32768  
SOLVENT CDCl3  
NS 8  
DS 0  
SWH 10330.570 Hz  
FIDRES 0.315264 Hz  
AQ 1.5859712 sec  
RG 101.6  
RW 48.400 usec  
DE 6.00 usec  
TE 296.4 K  
D1 1.00000000 sec  
D0 1

===== CHANNEL f1 =====  
NUC1 <sup>1</sup>H  
P1 10.50 usec  
PL1 0.25 dB  
SFO1 500.1330085 MHz

F2 - Processing parameters  
SI 16384  
SF 500.1300137 MHz  
WDW EM  
SSB 0  
LB 0.30 Hz  
GB 0  
PC 1.00

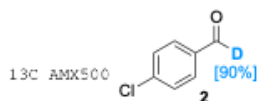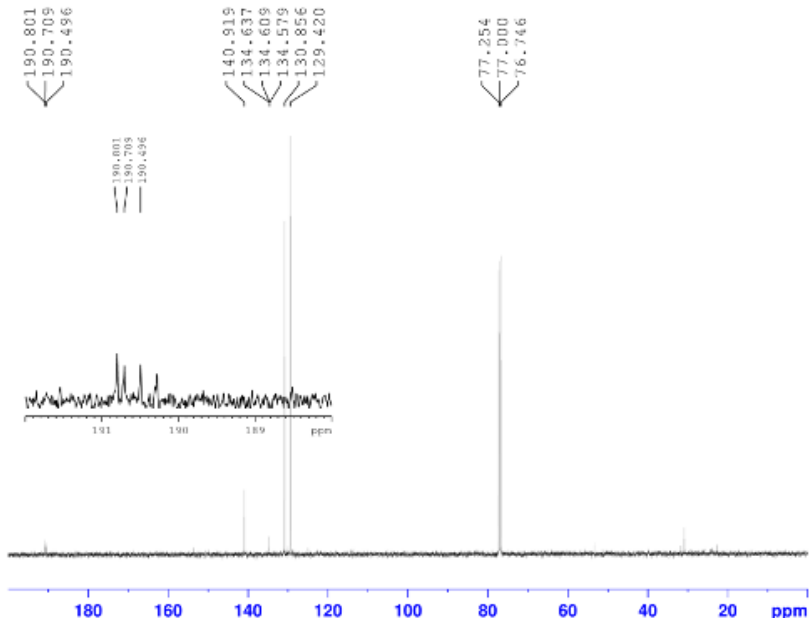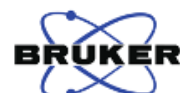

Current Data Parameters  
NAME yk0109-ky1-3180-1-1  
EXPNO 2  
PROCNO 1

F2 - Acquisition Parameters  
Date\_ 2020109  
Time 16.53  
INSTRUM spect  
PROBHD 5 mm PABBO BB/  
PULPROG zgpg30  
TD 65536  
SOLVENT CDCl3  
NS 152  
DS 0  
SWH 30030.029 Hz  
FIDRES 0.450222 Hz  
AQ 1.0911744 sec  
RG 18384  
RW 16.850 usec  
DE 6.00 usec  
TE 297.0 K  
P1 2.00000000 sec  
d11 0.03000000 sec  
DELTA 1.05999998 sec  
D0 20

===== CHANNEL f1 =====  
NUC1 <sup>13</sup>C  
P1 8.90 usec  
PL1 0 dB  
SFO1 125.7709936 MHz

===== CHANNEL f2 =====  
CPDPRG12 waltz16  
NUC2 <sup>1</sup>H  
PCPD2 80.00 usec  
PL2 0.25 dB  
PL12 17.89 dB  
PL13 15.83 dB  
SFO2 500.1320005 MHz

F2 - Processing parameters  
SI 32768  
SF 125.7577945 MHz  
WDW EM  
SSB 0  
LB 1.00 Hz  
GB 0  
PC 1.40

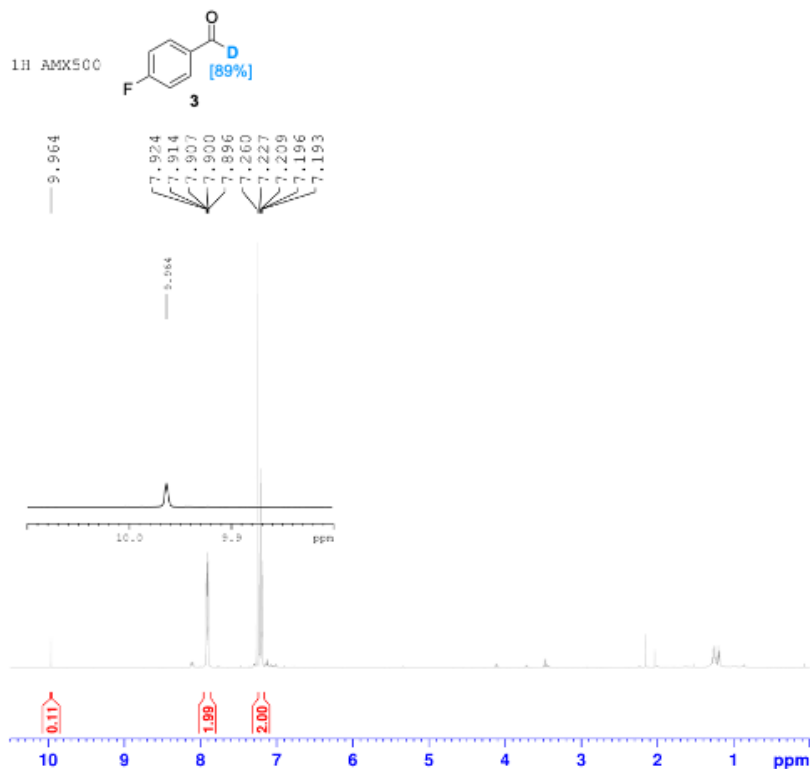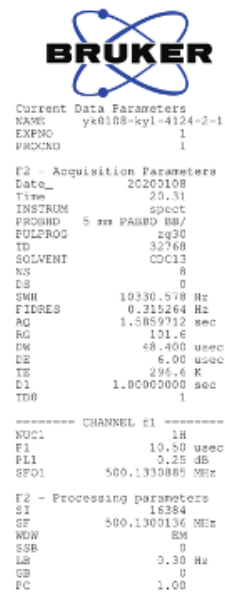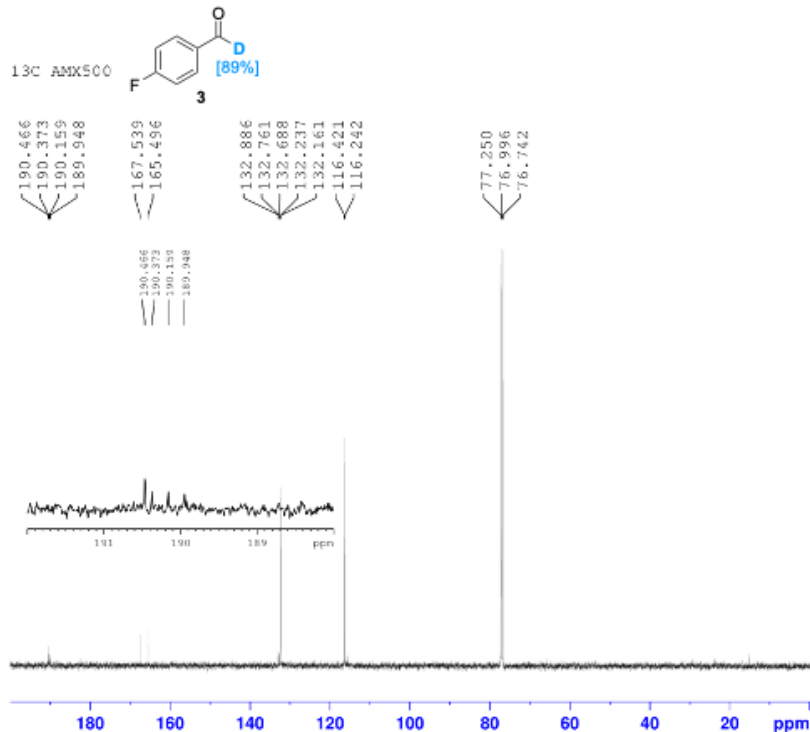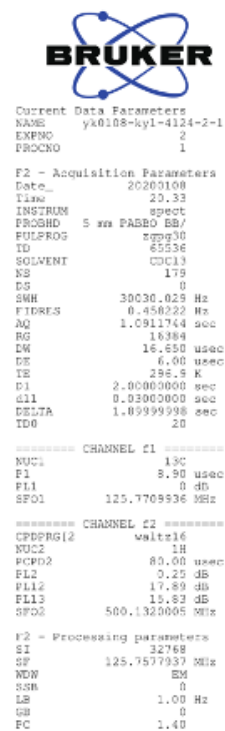

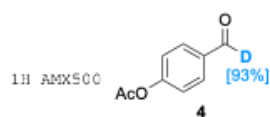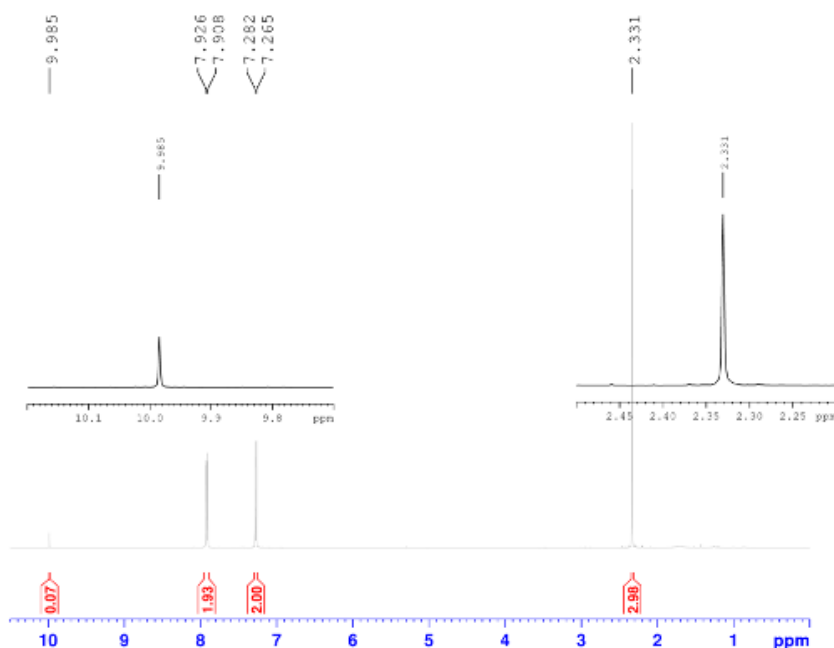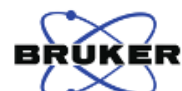

Current Data Parameters  
NAME yk0104-ky1-4122-3-1  
EXPNO 1  
PROCNO 1

F2 - Acquisition Parameters  
Date\_ 2020104  
Time 16.44  
INSTRUM spect  
PROBHD 5 mm PABBO BB/  
PULPROG zgpg  
TD 32768  
SOLVENT CDCl3  
NS 8  
DS 0  
SMN 10330.570 Hz  
FIDRES 0.315264 Hz  
AQ 1.5859712 sec  
RG 161.3  
RW 48.400 usec  
DE 6.00 usec  
TE 296.6 K  
D1 1.0000000 sec  
TD0 1

===== CHANNEL f1 =====  
NUC1 <sup>1</sup>H  
P1 10.50 usec  
PL1 0.25 dB  
SFO1 500.1330085 MHz  
  
F2 - Processing parameters  
SI 16384  
SF 500.1300114 MHz  
WDW EM  
SSB 0  
LB 0.30 Hz  
GB 0  
PC 1.00

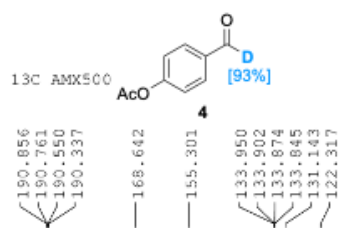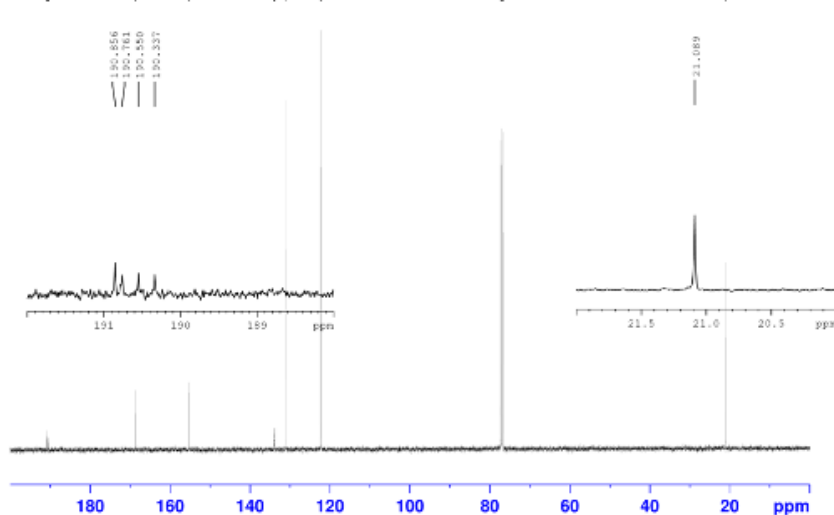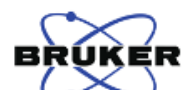

Current Data Parameters  
NAME yk0104-ky1-4122-3-1  
EXPNO 2  
PROCNO 1

F2 - Acquisition Parameters  
Date\_ 2020104  
Time 16.45  
INSTRUM spect  
PROBHD 5 mm PABBO BB/  
PULPROG zgpg30  
TD 65536  
SOLVENT CDCl3  
NS 178  
DS 0  
SMN 30030.049 Hz  
FIDRES 0.4358222 Hz  
AQ 1.0911744 sec  
RG 16384  
RW 16.650 usec  
DE 6.00 usec  
TE 296.6 K  
D1 2.0000000 sec  
d11 0.0300000 sec  
DELTA 1.8999998 sec  
TD0 20

===== CHANNEL f1 =====  
NUC1 <sup>13</sup>C  
P1 8.90 usec  
PL1 0 dB  
SFO1 125.7709936 MHz  
  
===== CHANNEL f2 =====  
CPDPRG2 waltz16  
NUC2 <sup>1</sup>H  
PCPD2 80.00 usec  
PL2 0.25 dB  
PL12 17.89 dB  
PL13 15.83 dB  
SFO2 500.1320005 MHz

F2 - Processing parameters  
SI 32768  
SF 125.7577964 MHz  
WDW EM  
SSB 0  
LB 1.00 Hz  
GB 0  
PC 1.40

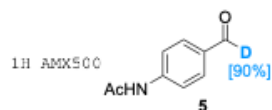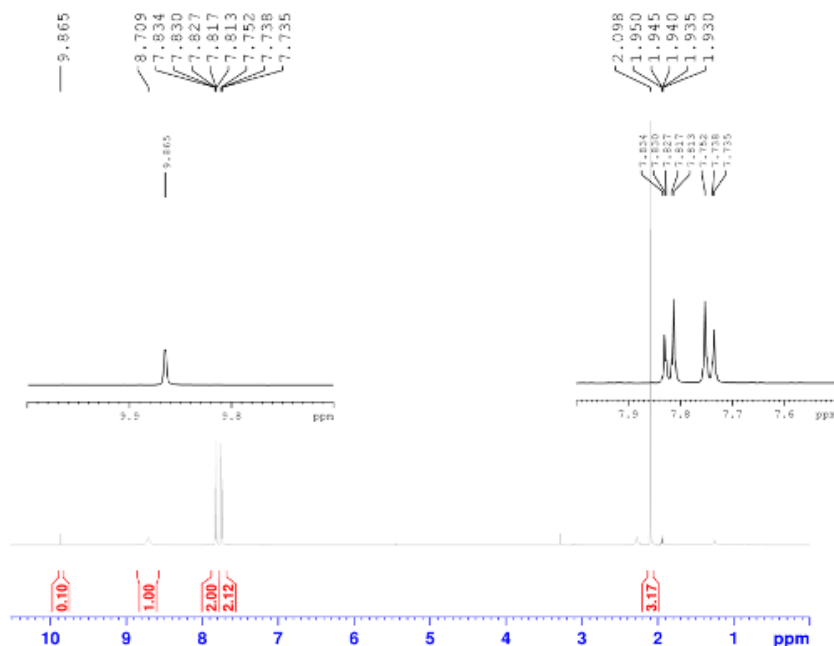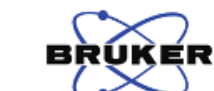

Current Data Parameters  
NAME yk0906-ky1-4020-3  
EXPNO 1  
PROCNO 1

F2 - Acquisition Parameters  
Date\_ 20190906  
Time 20.55  
INSTRUM spect  
PROBHD 5 mm PABBO BB/  
PULPROG zgpg30  
TD 32768  
SOLVENT CD3CN  
NS 8  
DS 0  
SMN 10130.570 Hz  
FIDRES 0.315264 Hz  
AQ 1.5859712 sec  
RG 57  
RM 48.400 usec  
DE 6.00 usec  
TE 296.2 K  
D1 1.00000000 sec  
TD0 1

===== CHANNEL f1 =====  
NUC1 <sup>1</sup>H  
P1 10.50 usec  
PL1 0.25 dB  
SFO1 500.1330085 MHz  
  
F2 - Processing parameters  
SI 16384  
SF 500.1300154 MHz  
WDW EM  
SSB 0  
LB 0.30 Hz  
GB 0  
PC 1.00

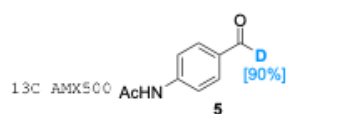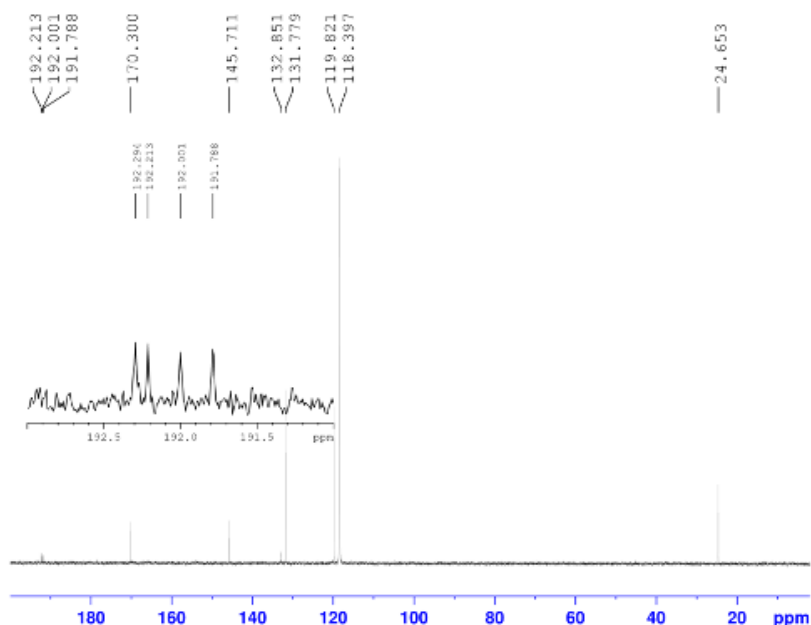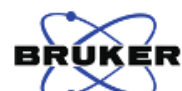

Current Data Parameters  
NAME yk0906-ky1-4020-3  
EXPNO 2  
PROCNO 1

F2 - Acquisition Parameters  
Date\_ 20190906  
Time 20.58  
INSTRUM spect  
PROBHD 5 mm PABBO BB/  
PULPROG zgpg30  
TD 65536  
SOLVENT CDCl3  
NS 127  
DS 0  
SMN 30030.029 Hz  
FIDRES 0.458222 Hz  
AQ 1.0911744 sec  
RG 16384  
RM 16.650 usec  
DE 6.00 usec  
TE 297.5 K  
D1 2.00000000 sec  
d11 0.03000000 sec  
DELTA 1.85999998 sec  
TD0 20

===== CHANNEL f1 =====  
NUC1 <sup>13</sup>C  
P1 8.90 usec  
PL1 0 dB  
SFO1 125.7709936 MHz  
  
===== CHANNEL f2 =====  
CPDPRG2 waltz16  
NUC2 <sup>1</sup>H  
PCPD2 80.00 usec  
PL2 0.25 dB  
PL12 17.89 dB  
PL13 15.83 dB  
SFO2 500.1320005 MHz

F2 - Processing parameters  
SI 32768  
SF 125.7576568 MHz  
WDW EM  
SSB 0  
LB 1.00 Hz  
GB 0  
PC 1.40

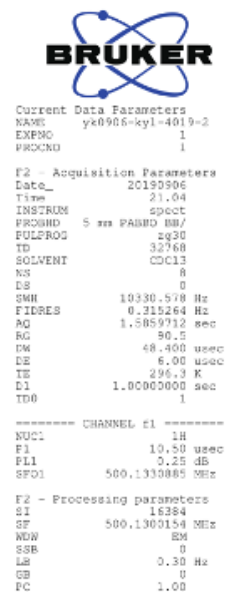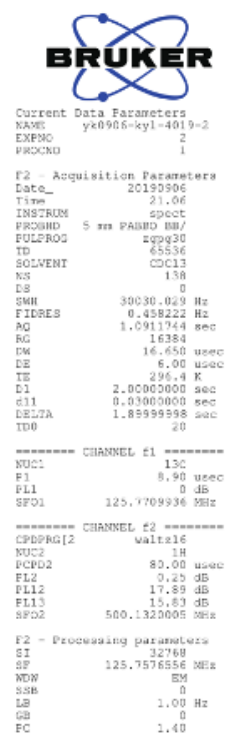

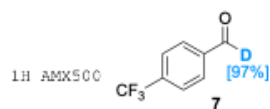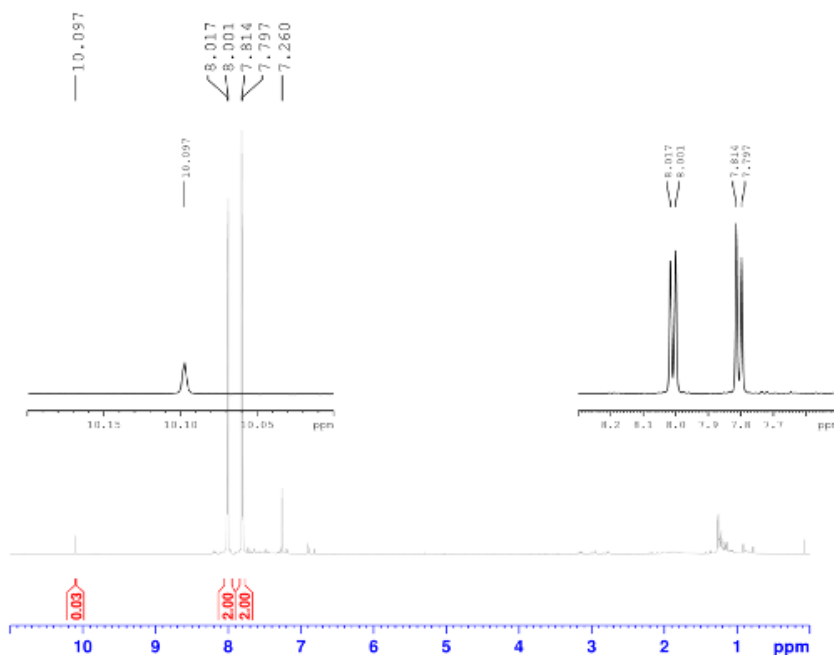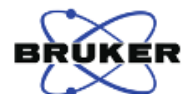

Current Data Parameters  
NAME yk0830-ky1-4022-3-1  
EXPNO 1  
PROCNO 1

F2 - Acquisition Parameters  
Date\_ 20190830  
Time\_ 19.05  
INSTRUM spect  
PROBHD 5 mm PABBO BB/  
PULPROG zg30  
ID 32768  
SOLVENT CDCl3  
NS 8  
DS 0  
SWH 10130.578 Hz  
FIDRES 0.315264 Hz  
AQ 1.5859712 sec  
RG 96.5  
DW 48.400 usec  
DE 6.00 usec  
TE 296.6 K  
D1 1.0000000 sec  
TD0 1

===== CHANNEL f1 =====  
NUC1 1H  
P1 10.50 usec  
PL1 0.25 dB  
SFO1 500.1330885 MHz  
F2 - Processing parameters  
SI 16384  
SF 500.1330137 MHz  
WDW EM  
SSB 0  
LB 0.30 Hz  
GB 0  
PC 1.00

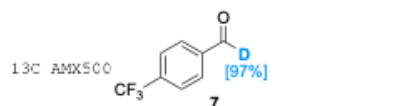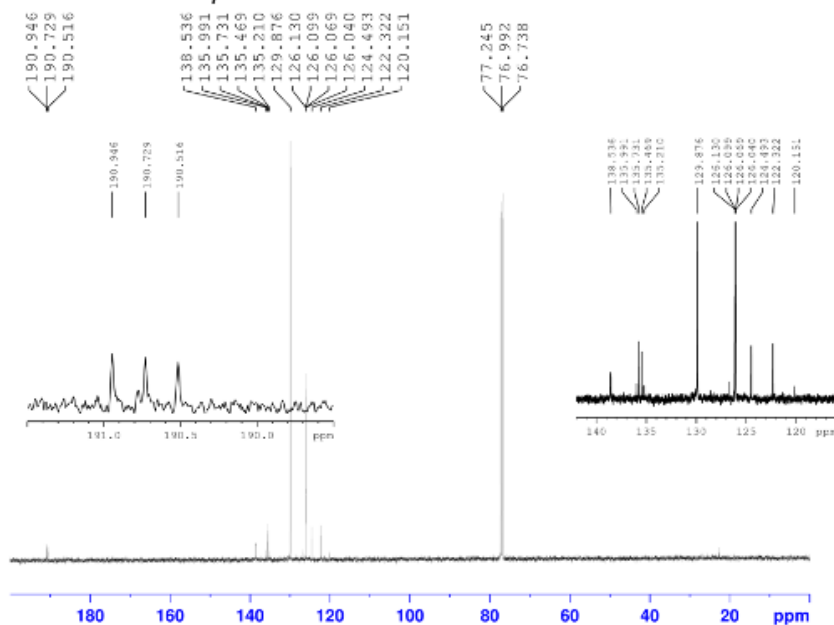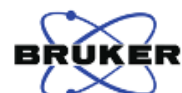

Current Data Parameters  
NAME yk0830-ky1-4022-3-1  
EXPNO 2  
PROCNO 1

F2 - Acquisition Parameters  
Date\_ 20190830  
Time\_ 19.10  
INSTRUM spect  
PROBHD 5 mm PABBO BB/  
PULPROG zgpg30  
ID 85536  
SOLVENT CDCl3  
NS 274  
DS 0  
SWH 30030.029 Hz  
FIDRES 0.450222 Hz  
AQ 1.0911744 sec  
RG 16384  
DW 16.650 usec  
DE 6.00 usec  
TE 296.6 K  
D1 2.0000000 sec  
C11 0.0300000 sec  
DELTA 1.8999998 sec  
TD0 20

===== CHANNEL f1 =====  
NUC1 13C  
P1 8.90 usec  
PL1 0 dB  
SFO1 125.7709536 MHz  
===== CHANNEL f2 =====  
CPDPRG2 waltz16  
NUC2 1H  
PCPD2 80.00 usec  
PL2 0.25 dB  
PL12 17.80 dB  
PL13 15.82 dB  
SFO2 500.1320005 MHz

F2 - Processing parameters  
SI 32768  
SF 125.7577922 MHz  
WDW EM  
SSB 0  
LB 1.00 Hz  
GB 0  
PC 1.40

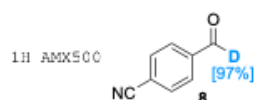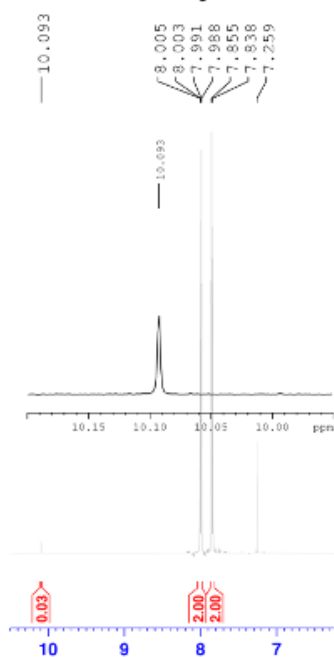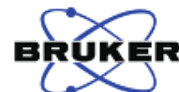

Current Data Parameters  
NAME yk0906-4yl-chenwei-1922  
EXPNO 1  
PROCNO 1

F2 - Acquisition Parameters  
Date\_ 20150906  
Time 20.45  
INSTRUM spect  
PROBHD 5 mm PARRD BB/  
PULPROG zgpg30  
TD 65536  
SOLVENT CDCl3  
NS 8  
DS 0  
SWH 16330.578 Hz  
FIDRES 0.113264 Hz  
AQ 1.5859712 sec  
RG 161.3  
DM 48.000 usec  
DE 6.00 usec  
TE 295.9 K  
D1 1.69000000 sec  
TDO 1

===== CHANNEL f1 =====  
NUC1 <sup>1</sup>H  
P1 10.50 usec  
PL1 0.25 dB  
SFO1 500.1330895 MHz  
F2 - Processing parameters  
SI 16384  
SF 500.1300137 MHz  
RG 64  
RM EM  
GB 0  
LB 0.30 Hz  
GB 0  
PC 1.00

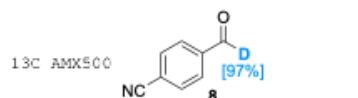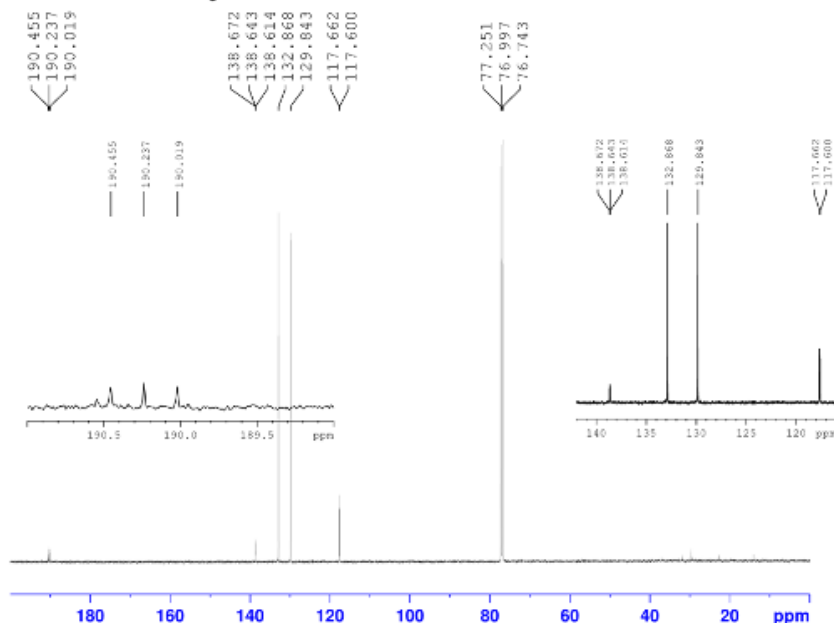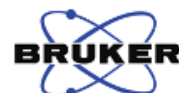

Current Data Parameters  
NAME yk0906-4yl-chenwei-1922  
EXPNO 2  
PROCNO 1

F2 - Acquisition Parameters  
Date\_ 20150906  
Time 20.46  
INSTRUM spect  
PROBHD 5 mm PARRD BB/  
PULPROG zgpg30  
TD 65536  
SOLVENT CDCl3  
NS 1366  
DS 0  
SWH 36930.029 Hz  
FIDRES 0.458222 Hz  
AQ 1.0911744 sec  
RG 16384  
DM 16.650 usec  
DE 6.00 usec  
TE 296.0 K  
D1 2.00000000 sec  
d11 0.02000000 sec  
DELTA 1.89999999 sec  
TDO 20

===== CHANNEL f1 =====  
NUC1 <sup>13</sup>C  
P1 8.90 usec  
PL1 0 dB  
SFO1 125.7709936 MHz  
===== CHANNEL f2 =====  
CPDPRG12 waltz16  
NUC2 <sup>1</sup>H  
PCPD2 80.00 usec  
PL2 0.25 dB  
PL12 17.89 dB  
PL13 15.83 dB  
SFO2 500.1320005 MHz

F2 - Processing parameters  
SI 32768  
SF 125.7577042 MHz  
RG 64  
RM EM  
GB 0  
LB 1.00 Hz  
GB 0  
PC 1.40

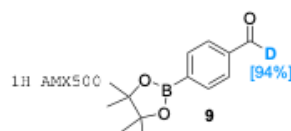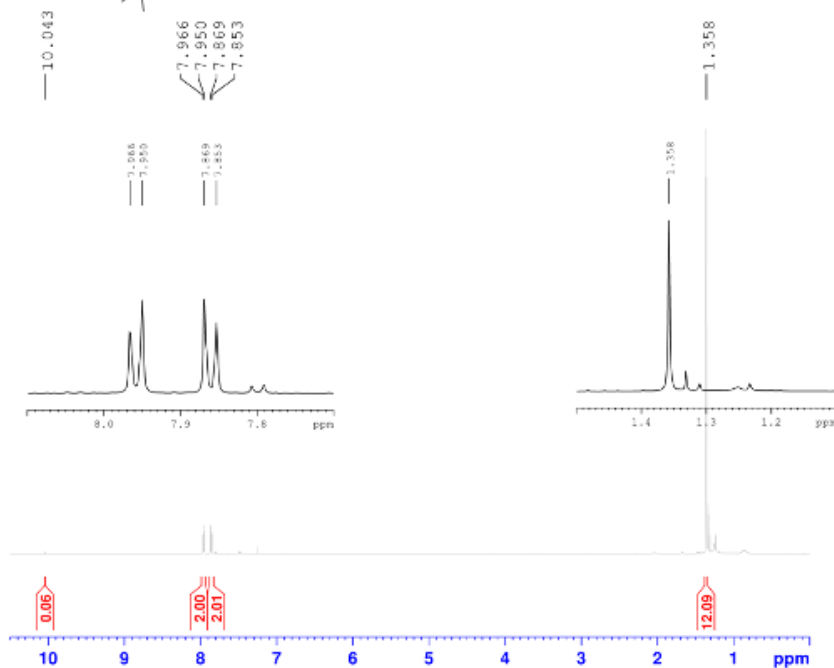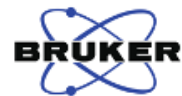

Current Data Parameters  
NAME yk0907-chenwei-1021-1  
EXPNO 1  
PROCNO 1

F2 - Acquisition Parameters  
Date\_ 20190908  
Time 10.01  
INSTRUM spect  
PROBHD 5 mm FARNDO BB/  
PULPROG zgpg30  
TD 32768  
SOLVENT CDCl3  
NS 8  
DS 0  
SWH 10330.570 Hz  
FIDRES 0.315264 Hz  
AQ 1.5859712 sec  
RG 57  
EN 48.400 usec  
DE 6.00 usec  
TE 297.1 K  
D1 1.00000000 sec  
TD0 1

===== CHANNEL f1 =====  
NUC1 <sup>1</sup>H  
P1 10.50 usec  
PL1 0.25 dB  
SFO1 500.1330885 MHz  
F2 - Processing parameters  
SI 16384  
SF 500.1330337 MHz  
KRM 32  
SSM 0  
LB 0.50 Hz  
GB 0  
PC 1.00

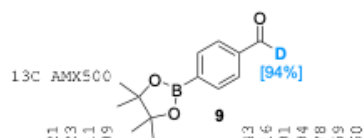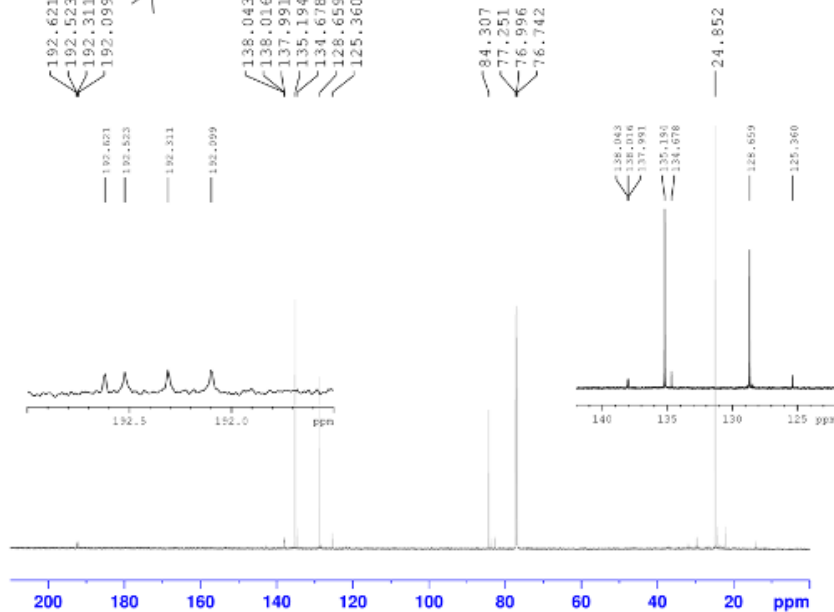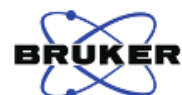

Current Data Parameters  
NAME yk0907-chenwei-1021-1  
EXPNO 2  
PROCNO 1

F2 - Acquisition Parameters  
Date\_ 20190908  
Time 10.02  
INSTRUM spect  
PROBHD 5 mm FARNDO BB/  
PULPROG zgpg30  
TD 65536  
SOLVENT CDCl3  
NS 1000  
DS 0  
SWH 30030.029 Hz  
FIDRES 0.438222 Hz  
AQ 1.0911744 sec  
RG 16384  
EN 16.650 usec  
DE 6.00 usec  
TE 297.2 K  
D1 2.00000000 sec  
d11 0.03000000 sec  
DELTA 1.89930998 sec  
TD0 20

===== CHANNEL f1 =====  
NUC1 <sup>13</sup>C  
P1 8.90 usec  
PL1 0 dB  
SFO1 125.7709936 MHz  
===== CHANNEL f2 =====  
CPDPRG2 waltz16  
NUC2 <sup>1</sup>H  
PCPD2 80.00 usec  
PL2 0.25 dB  
PL12 17.89 dB  
PL13 13.83 dB  
SFO2 500.1320085 MHz

F2 - Processing parameters  
SI 32768  
SF 125.7577028 MHz  
KRM 32  
SSM 0  
LB 1.00 Hz  
GB 0  
PC 1.40

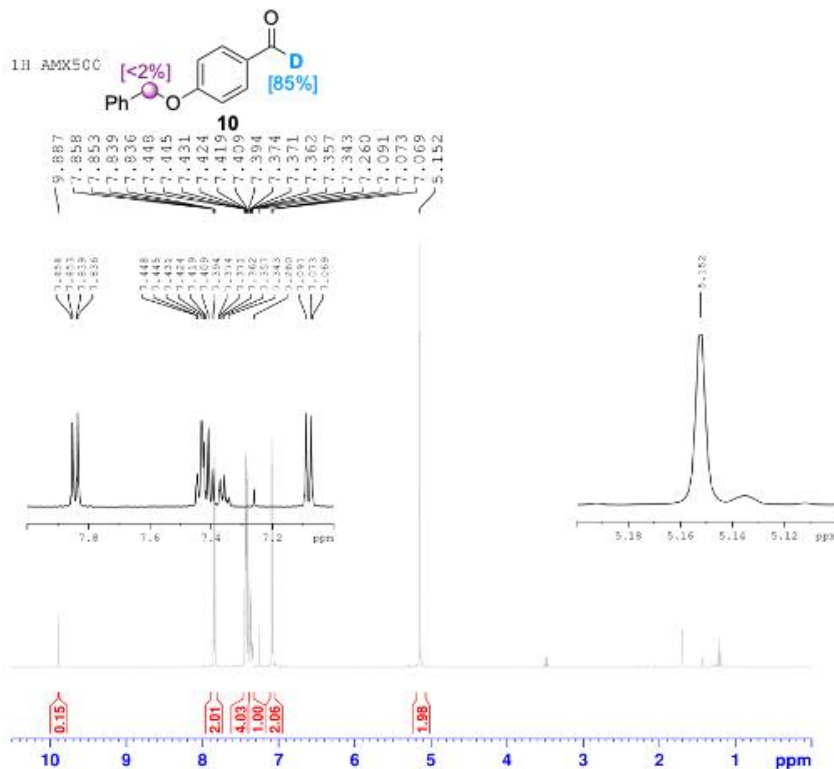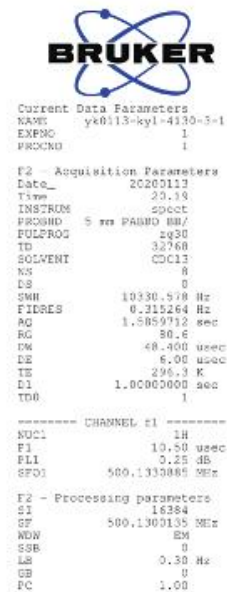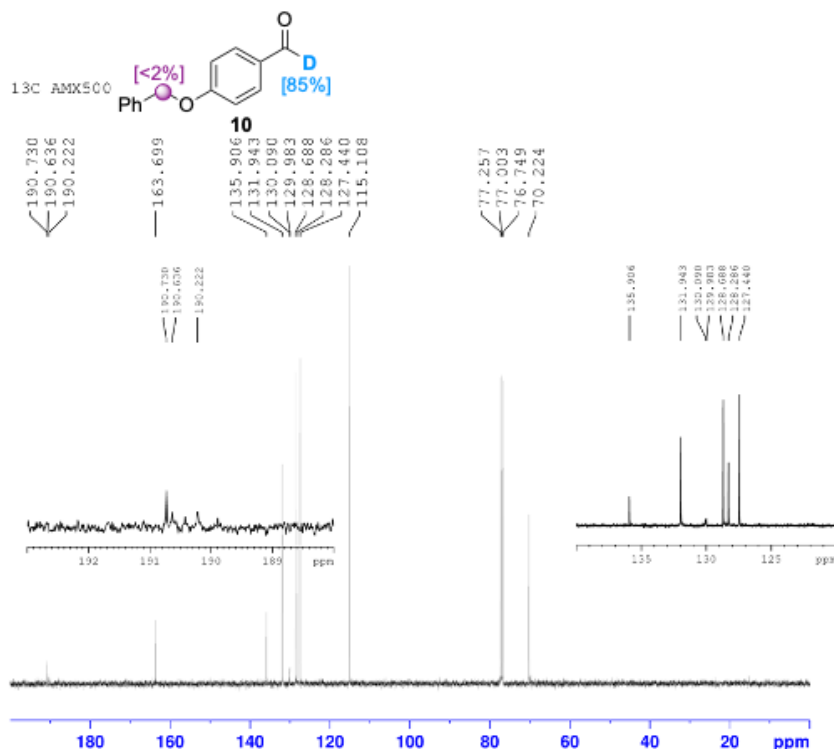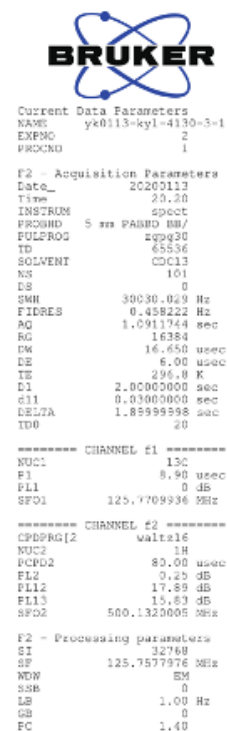

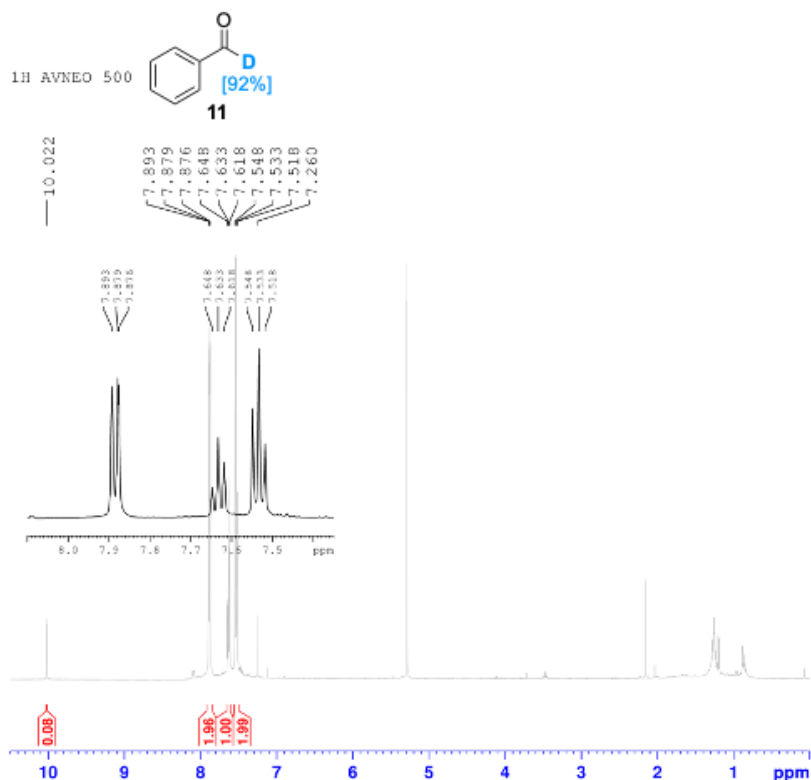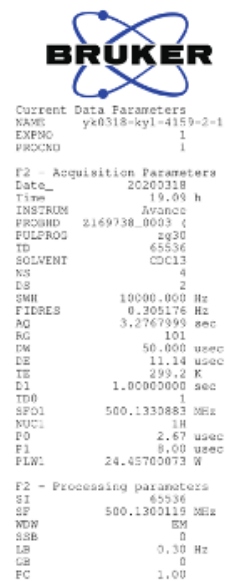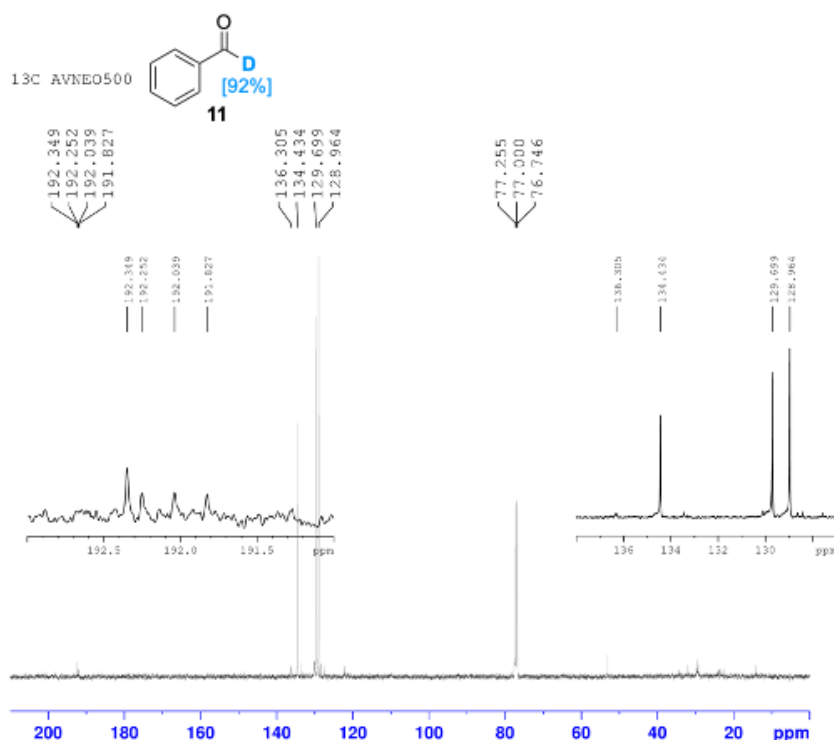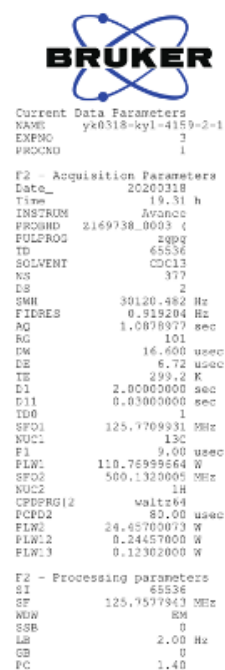

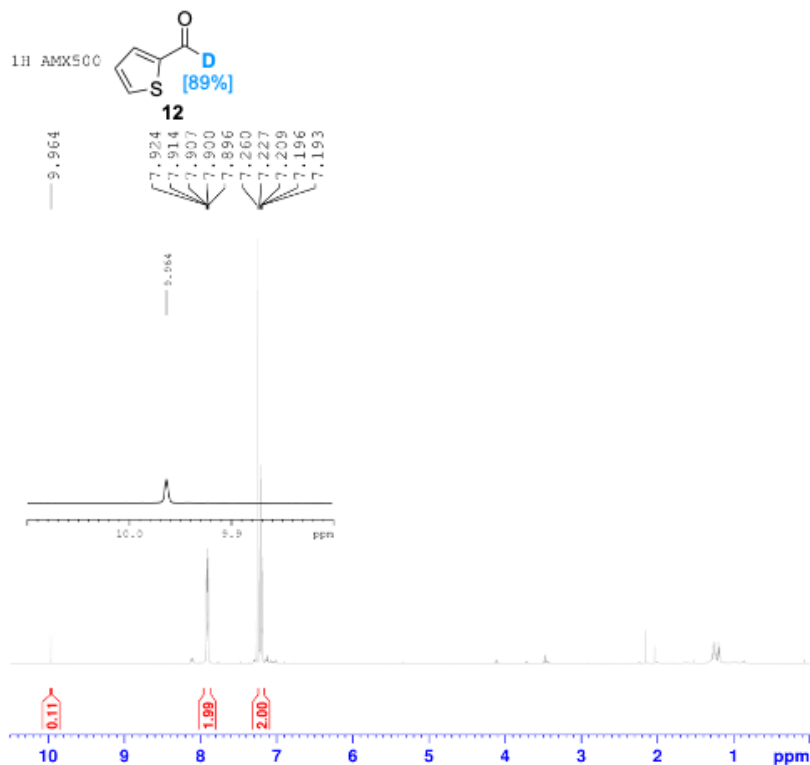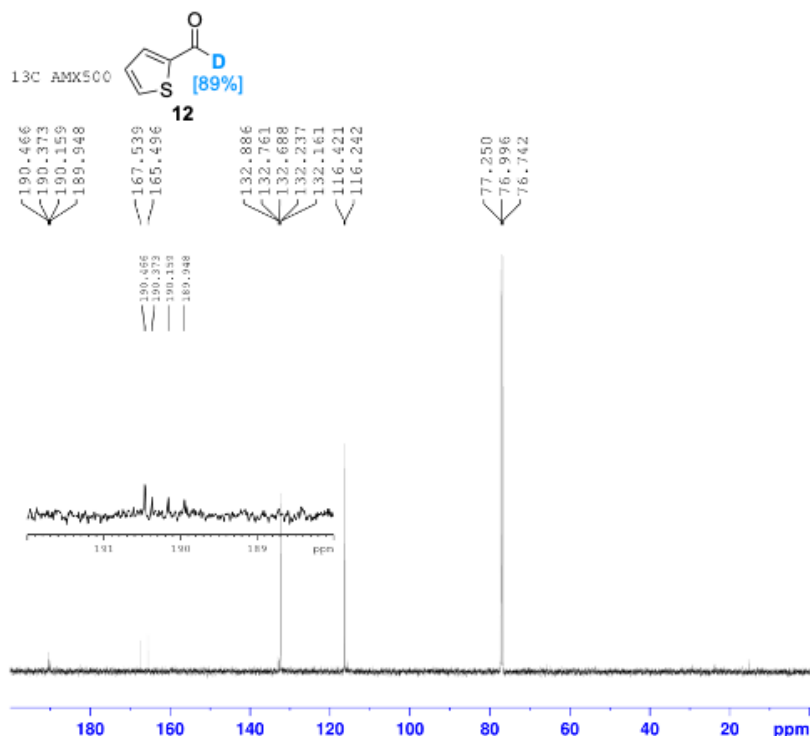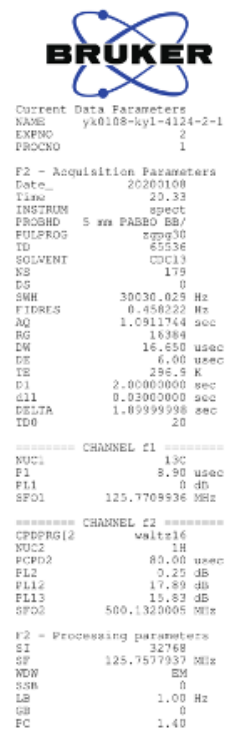

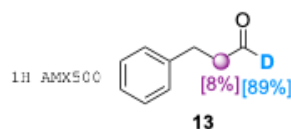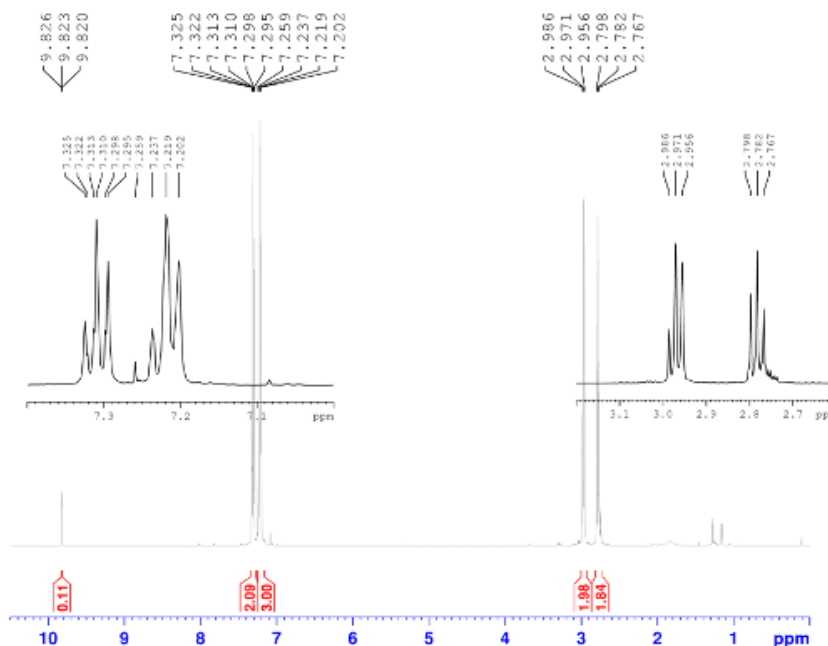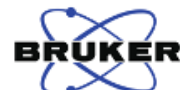

Current Data Parameters  
NAME yk0830-ky1-4022-2-1  
EXPNO 1  
PROCNO 1

F2 - Acquisition Parameters  
Date\_ 20190830  
Time 18.54  
INSTRUM spect  
PROBHD 5 mm PABBO BB/  
PULPROG zgpg30  
TD 32768  
SOLVENT CDCl3  
NS 8  
DS 0  
SMH 10330.578 Hz  
FIDRES 0.315264 Hz  
AQ 1.5859712 sec  
RG 45.3  
DM 48.400 usec  
DE 6.00 usec  
TE 296.5 K  
D1 1.00000000 sec  
TD0 1

===== CHANNEL f1 =====  
NUC1 <sup>1</sup>H  
P1 10.50 usec  
PL1 0.25 dB  
SFO1 500.1330085 MHz  
  
F2 - Processing parameters  
SI 16384  
SF 500.1300137 MHz  
WDW EM  
SSB 0  
LB 0.30 Hz  
GB 0  
PC 1.00

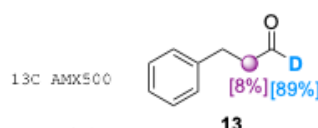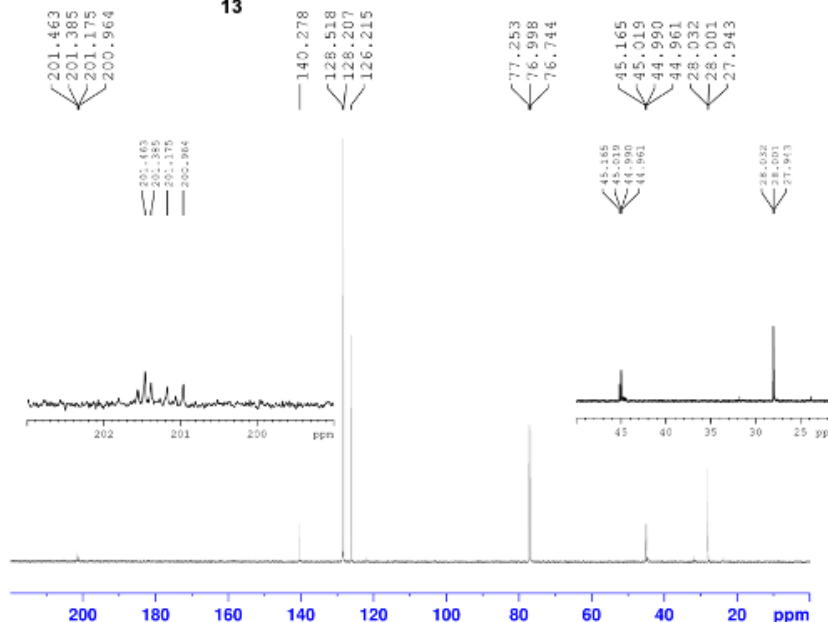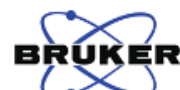

Current Data Parameters  
NAME yk0830-ky1-4022-2-1  
EXPNO 2  
PROCNO 1

F2 - Acquisition Parameters  
Date\_ 20190830  
Time 18.55  
INSTRUM spect  
PROBHD 5 mm PABBO BB/  
PULPROG zgpg30  
TD 65536  
SOLVENT CDCl3  
NS 224  
DS 0  
SMH 30030.029 Hz  
FIDRES 0.458222 Hz  
AQ 1.0911744 sec  
RG 16384  
DM 16.650 usec  
DE 6.00 usec  
TE 296.5 K  
D1 2.00000000 sec  
d11 0.03000000 sec  
DELTA 1.85999998 sec  
TD0 20

===== CHANNEL f1 =====  
NUC1 <sup>13</sup>C  
P1 8.90 usec  
PL1 0 dB  
SFO1 125.7709936 MHz  
  
===== CHANNEL f2 =====  
CPDPRG2 waltz16  
NUC2 <sup>1</sup>H  
PCPD2 80.00 usec  
PL2 0.25 dB  
PL12 17.89 dB  
PL13 15.83 dB  
SFO2 500.1320005 MHz

F2 - Processing parameters  
SI 32768  
SF 125.7578030 MHz  
WDW EM  
SSB 0  
LB 1.00 Hz  
GB 0  
PC 1.40

2H AV 500 NEO 23 May 2017  
0.1 EB in CDCl3

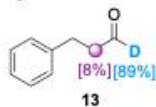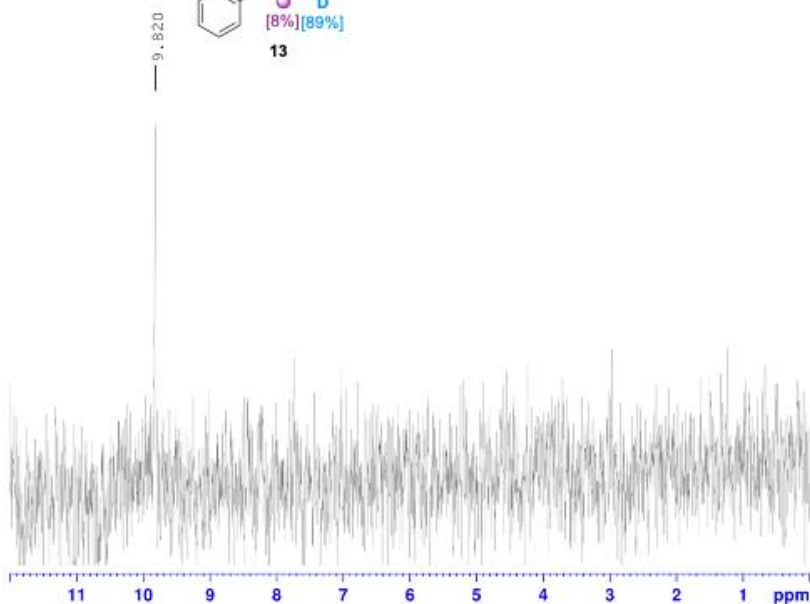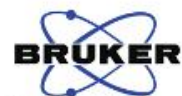

Current Data Parameters  
NAME thd-25-3  
EXPNO 2  
PROCNO 1

F2 - Acquisition Parameters  
Date\_ 20200629  
Time 15.40 h  
INSTRUM CAB AV4 500 MHS BASIC  
PROBHD 1144369 0005 (1  
PULPROG zgpg30  
TD 8192  
SOLVENT CDCl3  
NS 96  
DS 2  
SWH 1562.500 Hz  
FIDRES 0.381470 Hz  
AQ 2.6214399 sec  
RG 12.5  
DN 320.000 usec  
DE 4.50 usec  
TE 298.0 K  
D1 1.0000000 sec  
D11 0.0300000 sec  
TD0  
SFO1 76.7885582 MHz  
NUC1 1H  
P1 349.30 usec  
PL1 1.5000000 W

F2 - Processing parameters  
SI 63336  
SF 76.7881551 MHz  
WDW EM  
SSB 0  
LB 0.30 Hz  
GB 0  
PC 1.00

1H AMX500

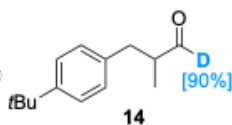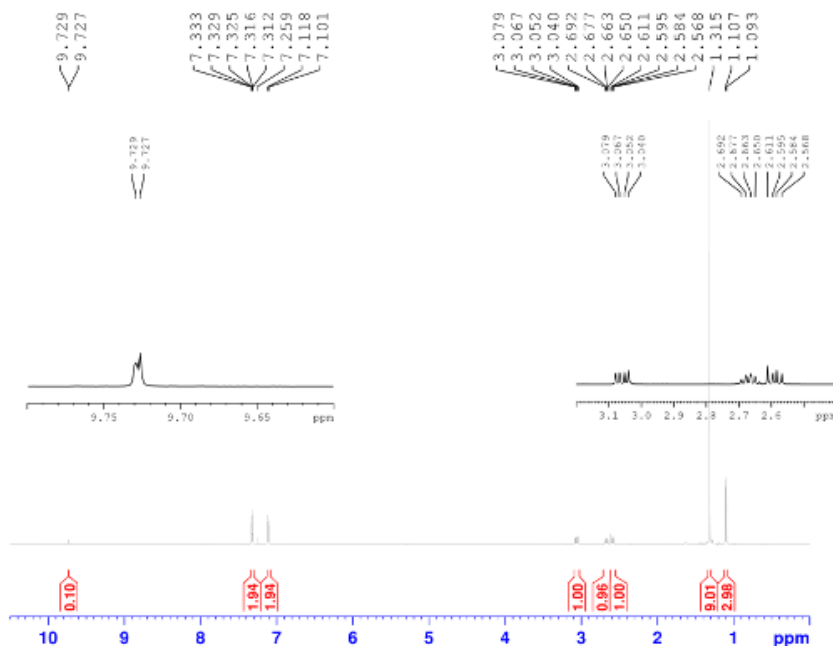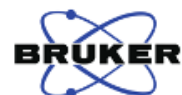

Current Data Parameters  
NAME yx0104-kyl-4122-2-1  
EXPNO 1  
PROCNO 1

F2 - Acquisition Parameters  
Date\_ 20201014  
Time 16.32  
INSTRUM spect  
PROBHD 5 mm PABBO BB/  
PULPROG zgpg30  
TD 32768  
SOLVENT CDCl3  
NS 8  
DS 0  
SWH 10330.578 Hz  
FIDRES 0.315264 Hz  
AQ 1.5859712 sec  
RG 64  
DN 48.400 usec  
DE 6.00 usec  
TE 298.5 K  
D1 1.0000000 sec  
TD0 1

===== CHANNEL f1 =====  
NUC1 1H  
P1 10.50 usec  
PL1 0.25 dB  
SFO1 500.1330885 MHz

F2 - Processing parameters  
SI 16384  
SF 500.1300130 MHz  
WDW EM  
SSB 0  
LB 0.30 Hz  
GB 0  
PC 1.00

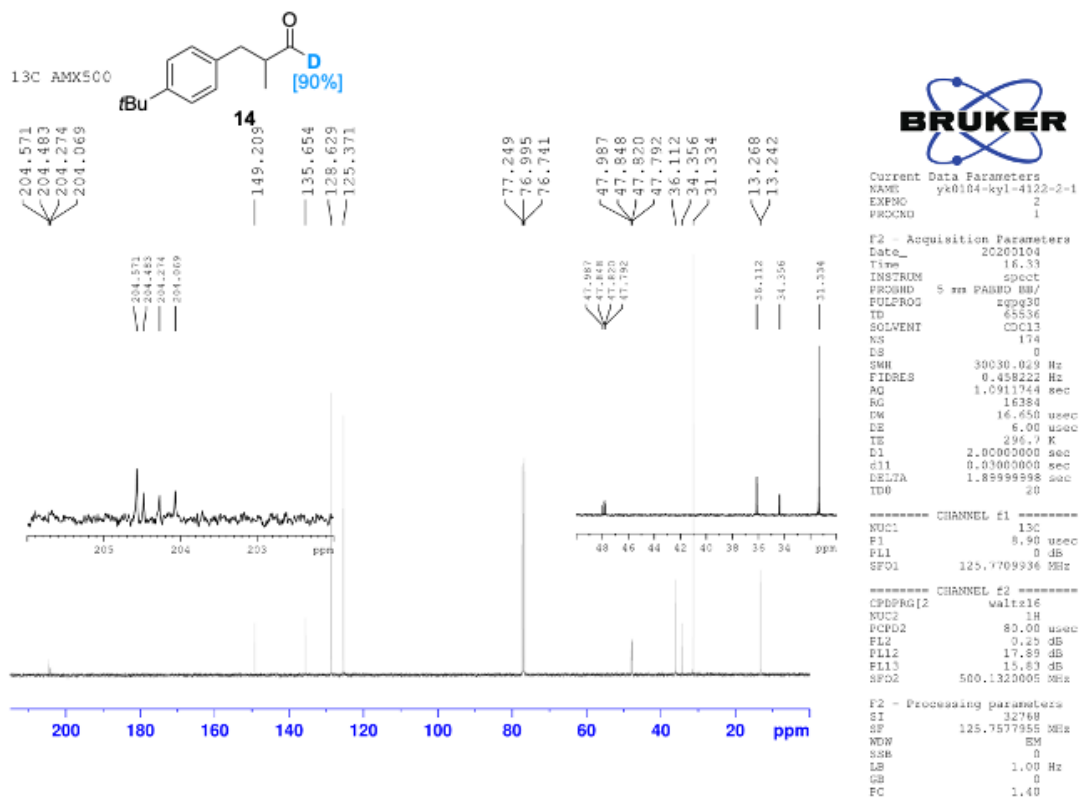

2H AV 500 NEO 23 May 2017 D NMR in CHCl3

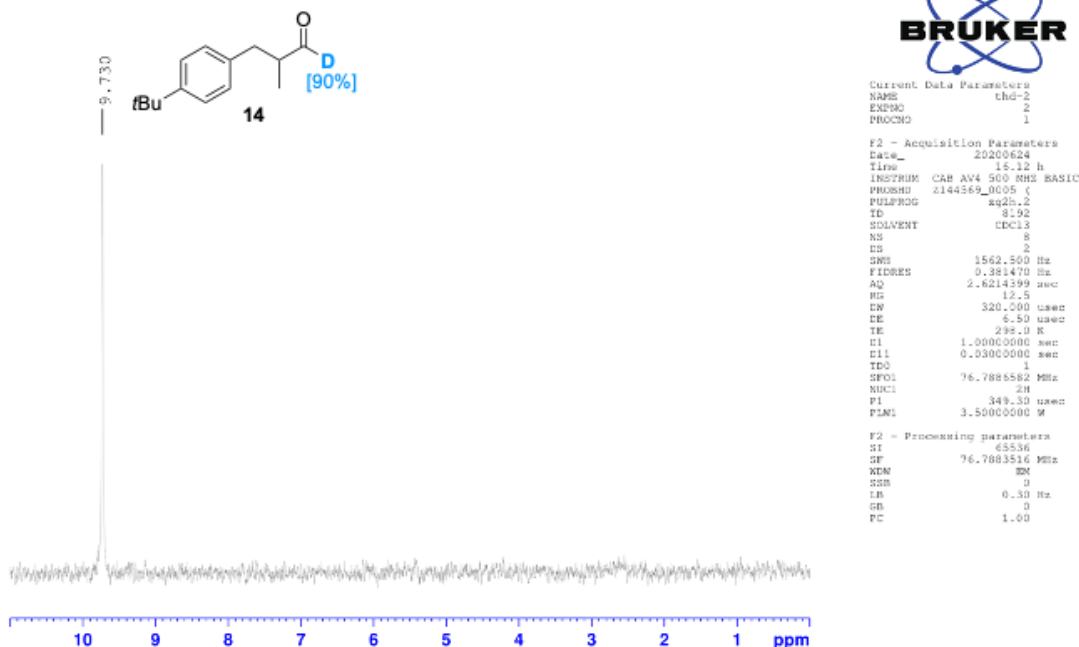

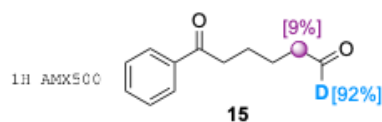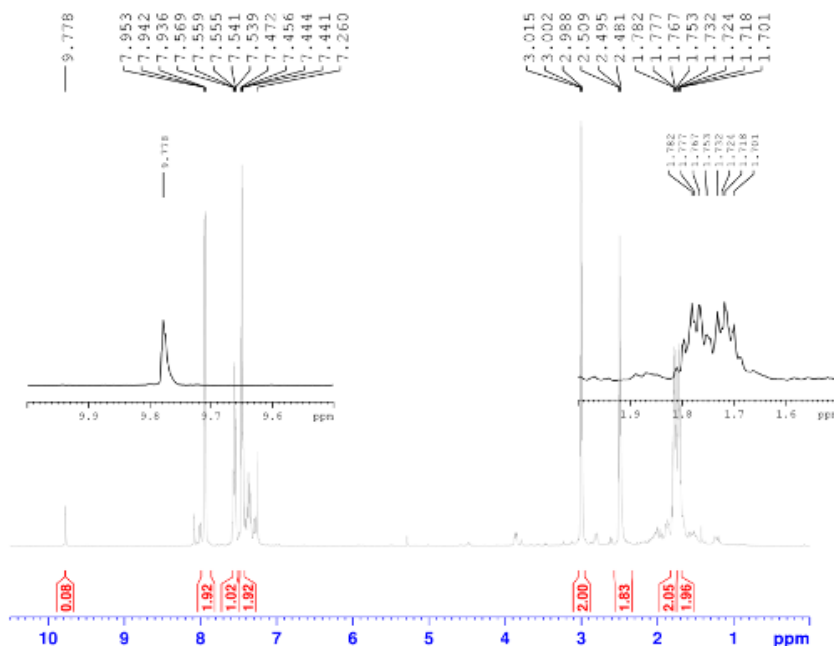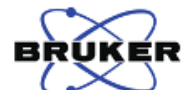

Current Data Parameters  
NAME yk0104-ky1-4122-1-1  
EXPNO 1  
PROCNO 1

F2 - Acquisition Parameters  
Date\_ 2020104  
Time 16.17  
INSTRUM spect  
PROBHD 5 mm PABBO BB/  
PULPROG zgpg30  
TD 32768  
SOLVENT CDCl3  
NS 8  
DS 0  
SWH 10130.570 Hz  
FIDRES 0.315264 Hz  
AQ 1.5859712 sec  
RG 50.5  
RW 68.400 usec  
DE 6.00 usec  
TE 296.2 K  
D1 1.0000000 sec  
TD0 1

===== CHANNEL f1 =====  
NUC1 <sup>1</sup>H  
P1 10.50 usec  
PL1 0.25 dB  
SFO1 500.1330085 MHz  
F2 - Processing parameters  
SI 16384  
SF 500.1300142 MHz  
WDW EM  
SSB 0  
LB 0.30 Hz  
GB 0  
PC 1.00

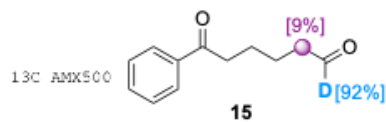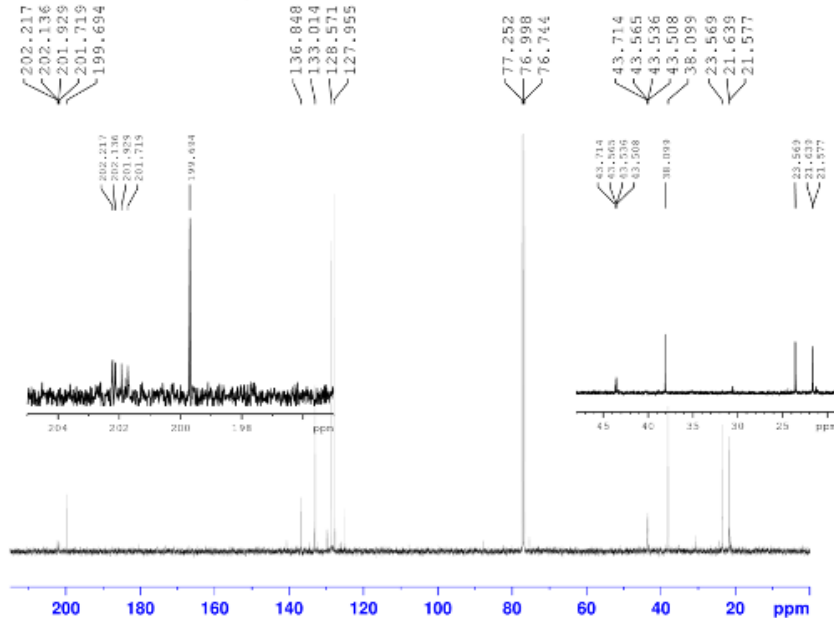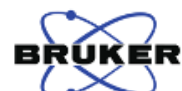

Current Data Parameters  
NAME yk0104-ky1-4122-1-1  
EXPNO 1  
PROCNO 1

F2 - Acquisition Parameters  
Date\_ 2020104  
Time 16.18  
INSTRUM spect  
PROBHD 5 mm PABBO BB/  
PULPROG zgpg30  
TD 65536  
SOLVENT CDCl3  
NS 241  
DS 0  
SWH 30030.025 Hz  
FIDRES 0.450222 Hz  
AQ 1.0911744 sec  
RG 16384  
RW 16.550 usec  
DE 6.00 usec  
TE 296.2 K  
D1 2.0000000 sec  
d11 0.0300000 sec  
DELTA 1.0999999 sec  
TD0 20

===== CHANNEL f1 =====  
NUC1 <sup>13</sup>C  
P1 8.90 usec  
PL1 0 dB  
SFO1 125.7709536 MHz  
===== CHANNEL f2 =====  
CPDPRG12 waltz16  
NUC2 <sup>1</sup>H  
PCPD2 80.00 usec  
PL2 0.25 dB  
PL12 17.80 dB  
PL13 15.82 dB  
SFO2 500.1320005 MHz

F2 - Processing parameters  
SI 32768  
SF 125.7577958 MHz  
WDW EM  
SSB 0  
LB 1.00 Hz  
GB 0  
PC 1.40

2H AV 500 NEO 23 May 2017 D NMR in CHCl3

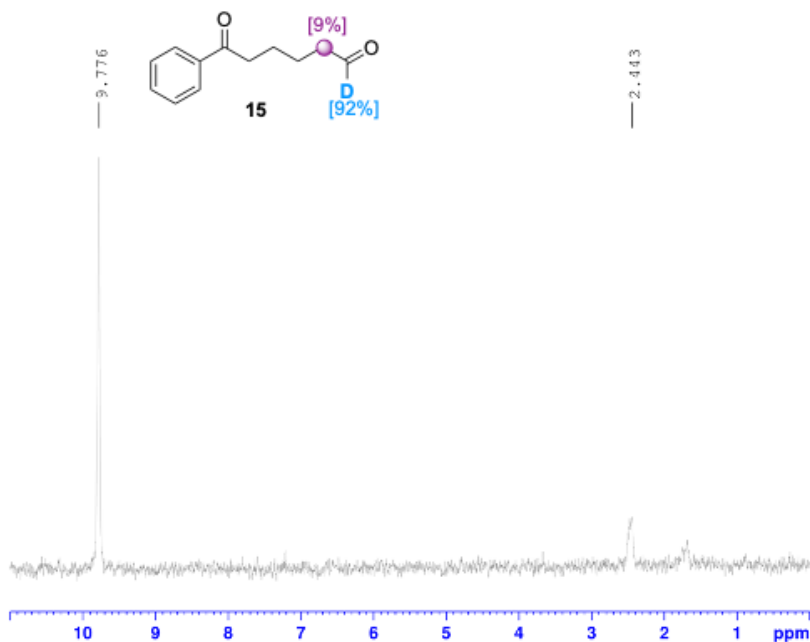

Current Data Parameters  
NAME thd-3  
EXPNO 2  
PROCNO 1

F2 - Acquisition Parameters  
Date\_ 20200624  
Time 15.15 h  
INSTRUM CPM AV4 500 MHz BASIC  
PROBHD 2144569\_0005 (4  
PULPROG zgpg30  
TD 65536  
SOLVENT CDCl3  
NS 16  
DS 2  
SWH 1562.500 Hz  
FIDRES 0.381470 Hz  
AQ 2.6214399 sec  
RG 12.5  
DM 320.000 usec  
DE 6.50 usec  
TE 298.0 K  
EI 1.00000000 sec  
E11 0.03000000 sec  
TD0 1  
SF01 76.7885582 MHz  
NUC1 2H  
P1 349.30 usec  
PL1 3.50000000 W

F2 - Processing parameters  
SI 65536  
SF 76.7883526 MHz  
WDW EM  
SSB 0  
LB 0.30 Hz  
GB 0  
PC 1.00

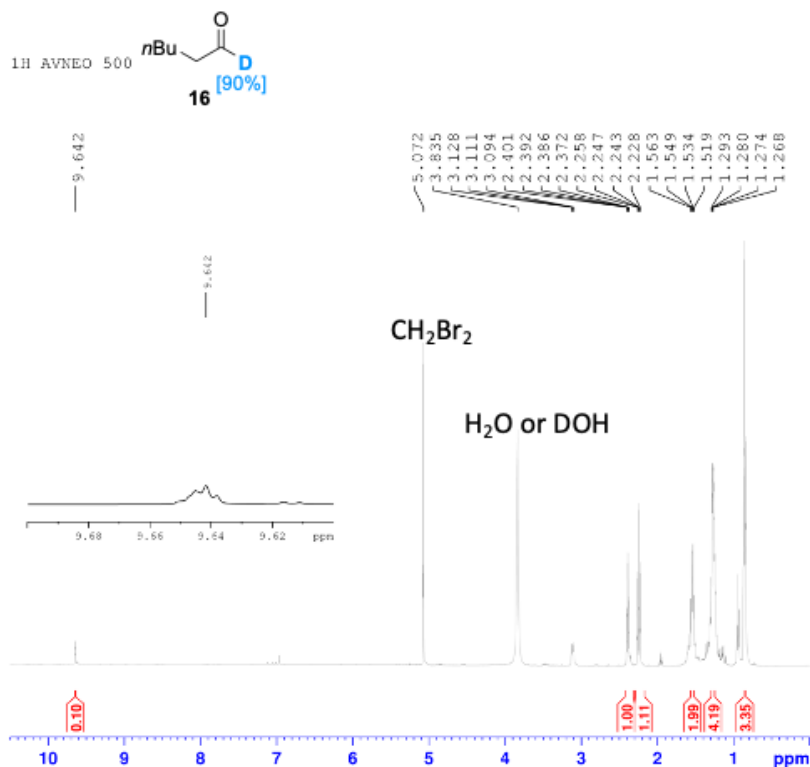

Current Data Parameters  
NAME yk0229-ky1-4138-2  
EXPNO 1  
PROCNO 1

F2 - Acquisition Parameters  
Date\_ 20200229  
Time 10.45 h  
INSTRUM Avance  
PROBHD 2169738\_0003 (4  
PULPROG zgpg30  
TD 65536  
SOLVENT CDCl3  
NS 8  
DS 2  
SWH 10000.000 Hz  
FIDRES 0.305176 Hz  
AQ 3.2767999 sec  
RG 101  
DM 50.000 usec  
DE 11.14 usec  
TE 298.0 K  
EI 1.00000000 sec  
TD0 1  
SF01 500.1330883 MHz  
NUC1 1H  
P0 2.67 usec  
P1 8.00 usec  
PL1 24.45705073 W

F2 - Processing parameters  
SI 65536  
SF 500.130098 MHz  
WDW EM  
SSB 0  
LB 0.30 Hz  
GB 0  
PC 1.00

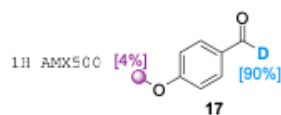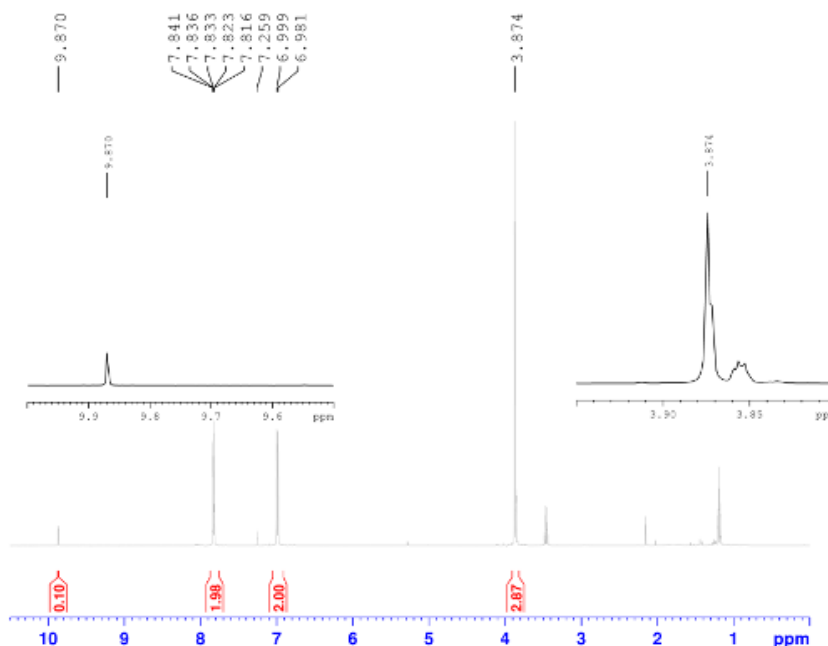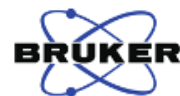

Current Data Parameters  
NAME yx0109-kyl-4127-2-1  
EXPNO 1  
PROCNO 1

F2 - Acquisition Parameters  
Date\_ 2020109  
Time 16.35  
INSTRUM spect  
PROBHD 5 mm PABBO BB/  
PULPROG zg30  
TD 32768  
SOLVENT CDCl3  
NS 8  
DS 0  
SWH 10330.570 Hz  
FIDRES 0.315264 Hz  
AQ 1.5859712 sec  
RG 71.8  
DM 48.400 usec  
DE 6.00 usec  
TE 295.0 K  
D1 1.00000000 sec  
TD0 1

===== CHANNEL f1 =====  
NUC1 1H  
P1 10.50 usec  
PL1 0.25 dB  
SFO1 500.1330885 MHz

F2 - Processing parameters  
SI 16384  
SF 500.130143 MHz  
WDW EM  
SSB 0  
LB 0.30 Hz  
GB 0  
PC 1.00

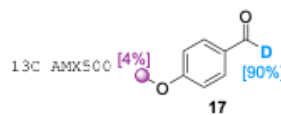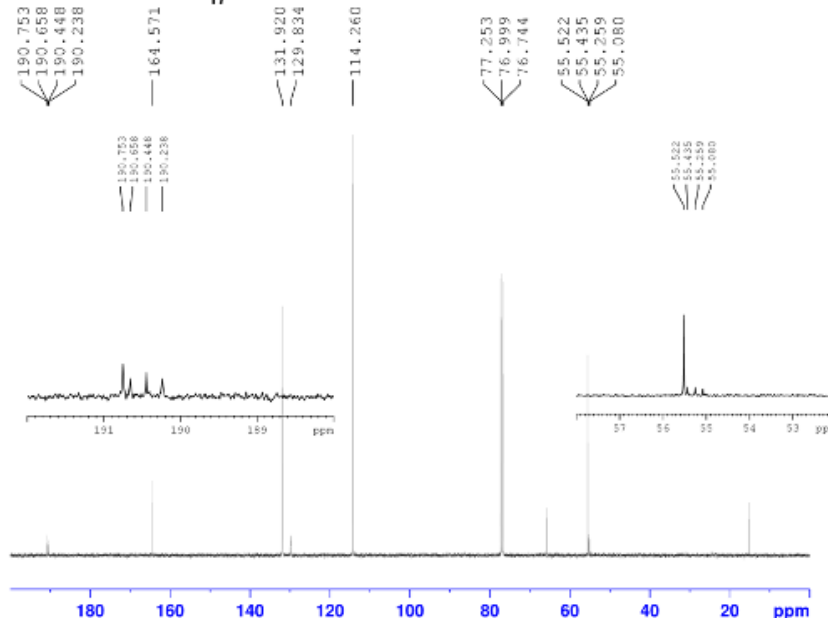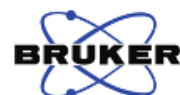

Current Data Parameters  
NAME yx0109-kyl-4127-2-1  
EXPNO 2  
PROCNO 1

F2 - Acquisition Parameters  
Date\_ 2020109  
Time 16.36  
INSTRUM spect  
PROBHD 5 mm PABBO BB/  
PULPROG zgpg30  
TD 65536  
SOLVENT CDCl3  
NS 238  
DS 0  
SWH 30030.029 Hz  
FIDRES 0.458222 Hz  
AQ 1.0911744 sec  
RG 16384  
DM 16.650 usec  
DE 6.00 usec  
TE 296.2 K  
D1 2.00000000 sec  
d11 0.03000000 sec  
DELTA 1.85999998 sec  
TD0 20

===== CHANNEL f1 =====  
NUC1 13C  
P1 8.90 usec  
PL1 0 dB  
SFO1 125.7709936 MHz

===== CHANNEL f2 =====  
CPDPRG2 waltz16  
NUC2 1H  
PCPD2 80.00 usec  
PL2 0.25 dB  
PL12 17.89 dB  
PL13 15.83 dB  
SFO2 500.1320005 MHz

F2 - Processing parameters  
SI 32768  
SF 125.7577964 MHz  
WDW EM  
SSB 0  
LB 1.00 Hz  
GB 0  
PC 1.40

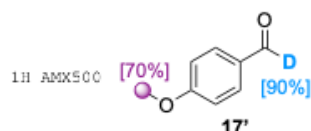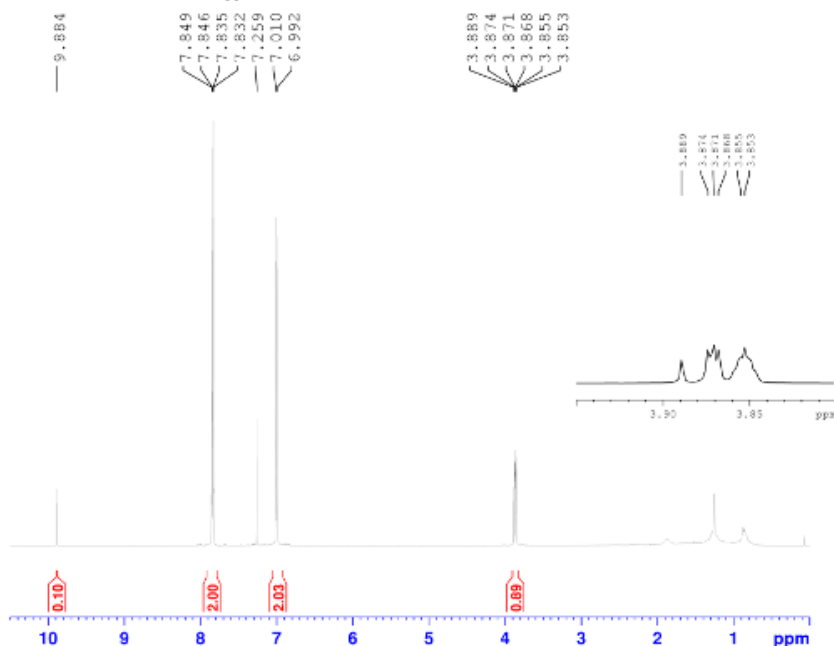

Current Data Parameters  
NAME yk1011-ky1-4027-6-1  
EXPNO 1  
PROCNO 1

F2 - Acquisition Parameters  
Date\_ 20191008  
Time 20.00  
INSTRUM spect  
PROBHD 5 mm PABBO BB/  
PULPROG zgpg30  
TD 32768  
SOLVENT CDCl3  
NS 8  
DS 0  
SWH 10330.570 Hz  
FIDRES 0.315264 Hz  
AQ 1.5859712 sec  
RG 114  
DM 68.400 usec  
DE 6.00 usec  
TE 296.4 K  
D1 1.00000000 sec  
TD0 1

===== CHANNEL f1 =====  
NUC1 1H  
P1 10.50 usec  
PL1 0.25 dB  
SFO1 500.1330085 MHz  
  
F2 - Processing parameters  
SI 16384  
SF 500.130137 MHz  
WDW EM  
SSB 0  
LB 0.30 Hz  
GB U  
PC 1.00

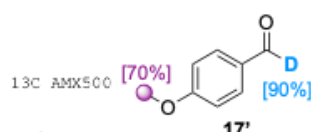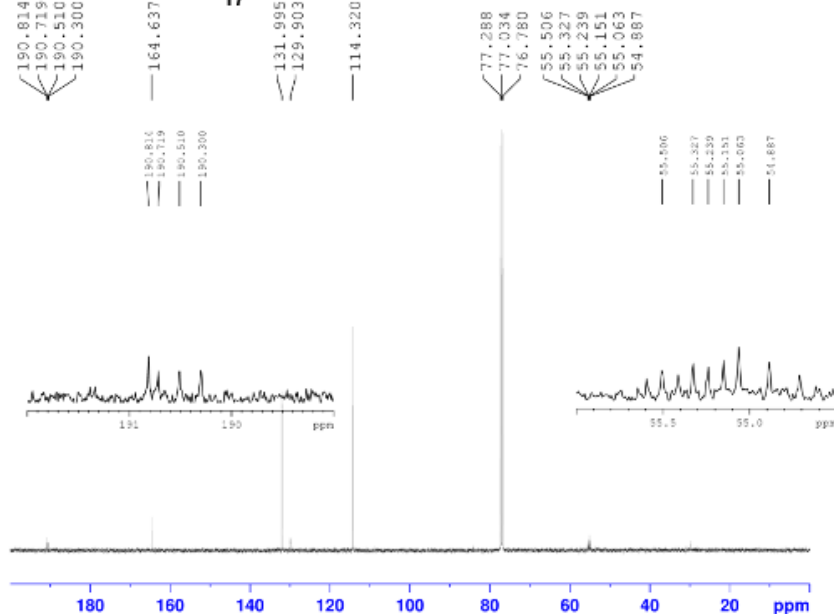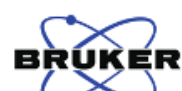

Current Data Parameters  
NAME yk1011-ky1-4027-6-1  
EXPNO 2  
PROCNO 1

F2 - Acquisition Parameters  
Date\_ 20191008  
Time 20.01  
INSTRUM spect  
PROBHD 5 mm PABBO BB/  
PULPROG zgpg30  
TD 65536  
SOLVENT CDCl3  
NS 352  
DS 0  
SWH 30030.029 Hz  
FIDRES 0.458222 Hz  
AQ 1.0911744 sec  
RG 16384  
DM 16.650 usec  
DE 6.00 usec  
TE 296.4 K  
D1 2.00000000 sec  
d11 0.03000000 sec  
DELTA 1.89999998 sec  
TD0 20

===== CHANNEL f1 =====  
NUC1 13C  
P1 8.90 usec  
PL1 0 dB  
SFO1 125.7709936 MHz  
  
===== CHANNEL f2 =====  
CPDPRG2 waltz16  
NUC2 1H  
PCPD2 80.00 usec  
PL2 0.25 dB  
PL12 17.89 dB  
PL13 15.83 dB  
SFO2 500.1320005 MHz

F2 - Processing parameters  
SI 32768  
SF 125.7577890 MHz  
WDW EM  
SSB 0  
LB 1.00 Hz  
GB 0  
PC 1.40

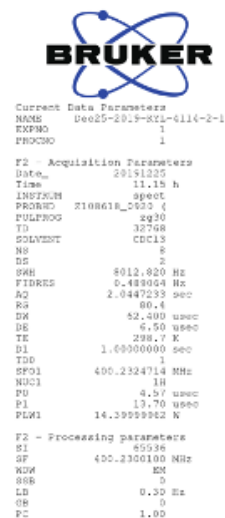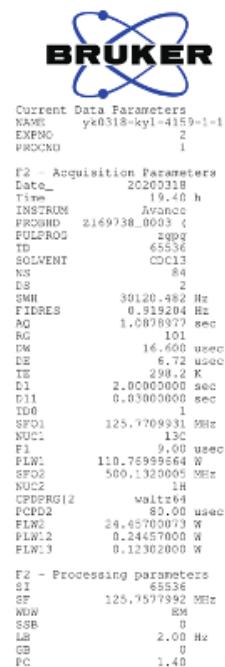

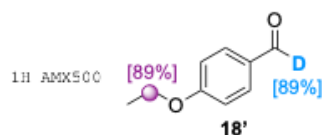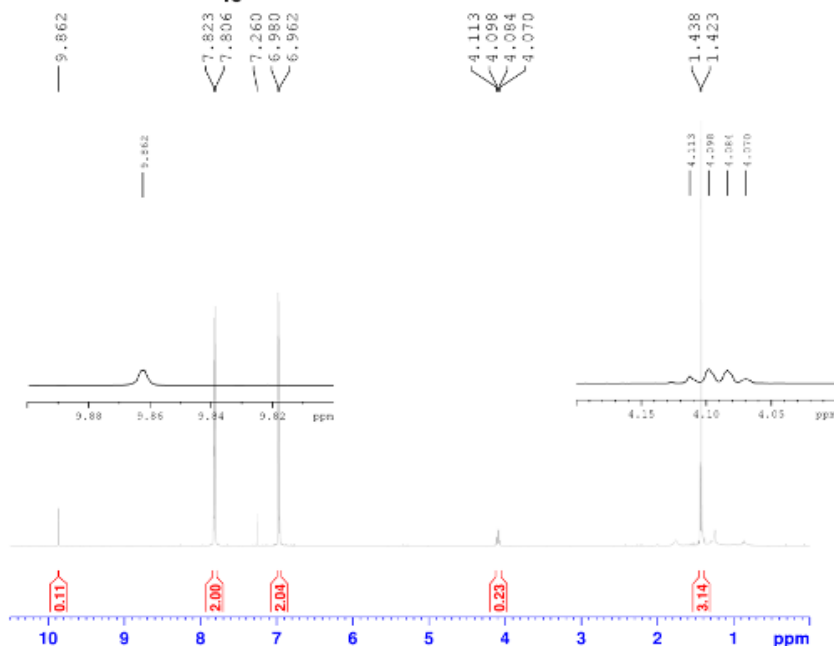

**BRUKER**

Current Data Parameters  
 NAME ykl224-ky1-4112-5-1  
 EXPMO 1  
 PROCNO 1

F2 - Acquisition Parameters  
 Date\_ 20191224  
 Time 20.37  
 INSTRUM spect  
 PROBNM 5 mm PABBO BB/  
 PULPROG zgpg30  
 TD 32768  
 SOLVENT CDCl3  
 NS 8  
 DS 0  
 SMN 10330.578 Hz  
 FIDRES 0.315264 Hz  
 AQ 1.5859712 sec  
 RG 80.6  
 DM 48.400 usec  
 DE 6.00 usec  
 TE 297.0 K  
 D1 1.00000000 sec  
 D0 1

===== CHANNEL f1 =====  
 NUC1 <sup>1</sup>H  
 P1 10.50 usec  
 PL1 0.25 dB  
 SFO1 500.1330085 MHz

F2 - Processing parameters  
 SI 16384  
 SF 500.1300135 MHz  
 NDW EM  
 SSB 0  
 LB 0.30 Hz  
 GB 0  
 PC 1.00

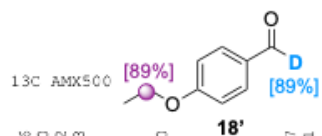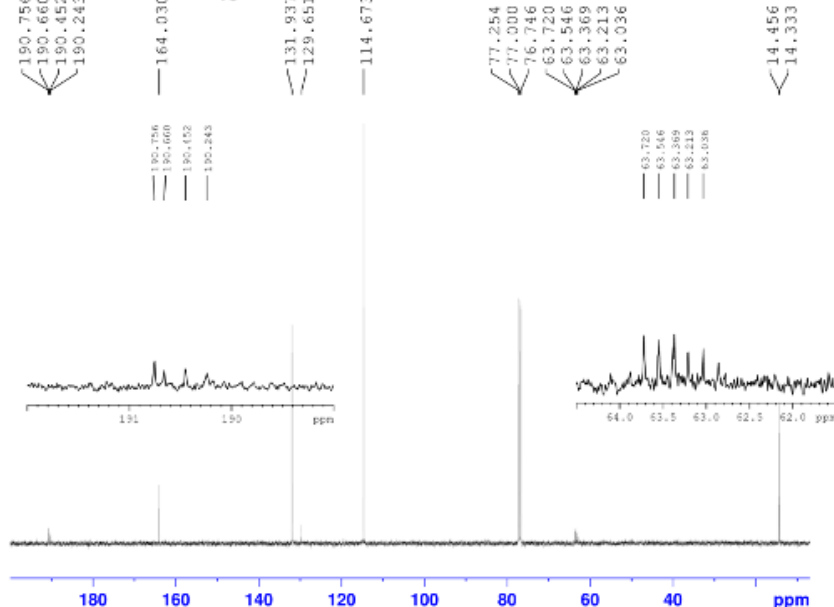

**BRUKER**

Current Data Parameters  
 NAME ykl224-ky1-4112-5-1  
 EXPMO 2  
 PROCNO 1

F2 - Acquisition Parameters  
 Date\_ 20191224  
 Time 20.38  
 INSTRUM spect  
 PROBNM 5 mm PABBO BB/  
 PULPROG zgpg30  
 TD 65536  
 SOLVENT CDCl3  
 NS 101  
 DS 0  
 SMN 30030.029 Hz  
 FIDRES 0.458222 Hz  
 AQ 1.0911744 sec  
 RG 16384  
 DM 16.650 usec  
 DE 6.00 usec  
 TE 297.4 K  
 D1 2.00000000 sec  
 d11 0.03000000 sec  
 DELTA 1.85999998 sec  
 D0 20

===== CHANNEL f1 =====  
 NUC1 <sup>13</sup>C  
 P1 8.90 usec  
 PL1 0 dB  
 SFO1 125.7709936 MHz

===== CHANNEL f2 =====  
 CPDPRG2 waltz16  
 NUC2 <sup>1</sup>H  
 PCPD2 80.00 usec  
 PL2 0.25 dB  
 PL12 17.89 dB  
 PL13 15.83 dB  
 SFO2 500.1320005 MHz

F2 - Processing parameters  
 SI 32768  
 SF 125.7577956 MHz  
 NDW EM  
 SSB 0  
 LB 1.00 Hz  
 GB 0  
 PC 1.40

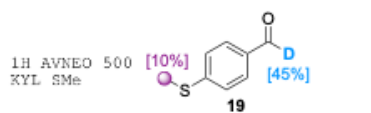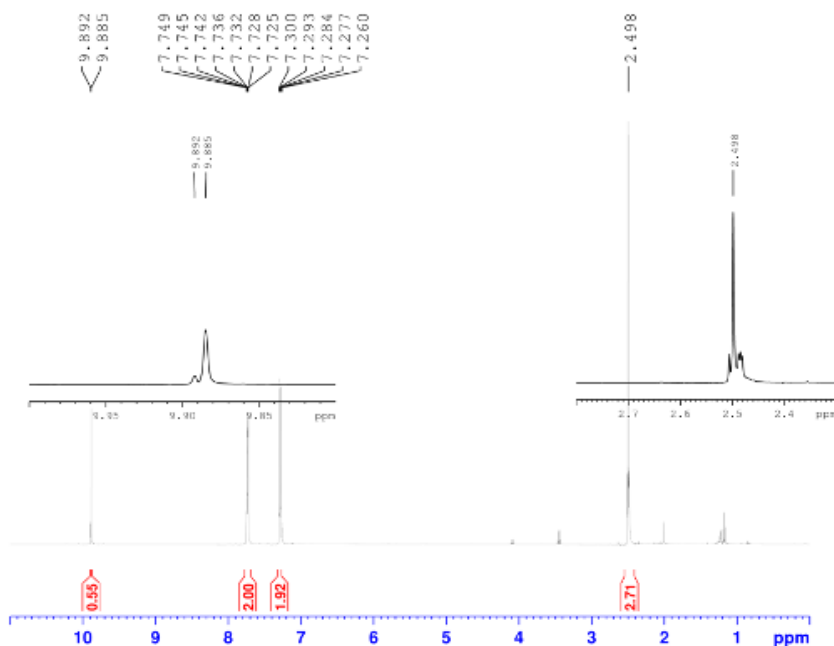

Current Data Parameters  
NAME yk0229-ky1-4138-34  
EXPNO 1  
PROCNO 1

F2 - Acquisition Parameters  
Date\_ 20200229  
Time 10.18 h  
INSTRUM Avance  
PROBHD 2169738\_0003 (4  
PULPROG zgpg30  
ID 65536  
SOLVENT CDCl3  
NS 8  
DS 2  
SWH 10000.000 Hz  
FIDRES 0.305176 Hz  
AQ 3.2767995 sec  
RG 101  
DW 50.000 usec  
DE 11.14 usec  
TE 298.0 K  
D1 1.00000000 sec  
TD0 1  
SFO1 500.133083 MHz  
NUC1 1H  
P0 2.67 usec  
F1 8.00 usec  
PLW1 24.45700073 W

F2 - Processing parameters  
SI 65536  
SF 500.1330138 MHz  
WDW EM  
SSB 0  
LB 0.30 Hz  
GB 0  
PC 1.00

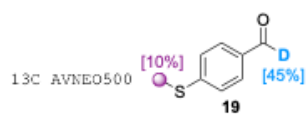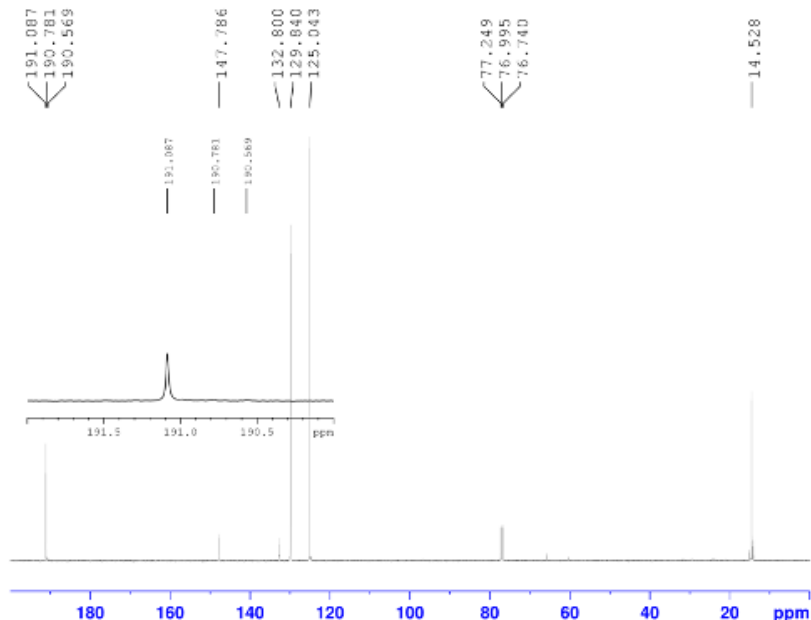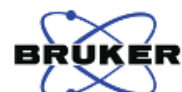

Current Data Parameters  
NAME yk0229-ky1-4138-34  
EXPNO 2  
PROCNO 1

F2 - Acquisition Parameters  
Date\_ 20200229  
Time 10.28 h  
INSTRUM Avance  
PROBHD 2169738\_0003 (4  
PULPROG zgpg30  
ID 65536  
SOLVENT CDCl3  
NS 153  
DS 2  
SWH 30120.482 Hz  
FIDRES 0.318204 Hz  
AQ 1.0078977 sec  
RG 101  
DW 16.600 usec  
DE 6.72 usec  
TE 298.2 K  
D1 2.00000000 sec  
D11 0.03000000 sec  
TD0 1  
SFO1 125.7709931 MHz  
NUC1 13C  
F1 9.00 usec  
PLW1 110.78999564 W  
SFO2 500.1320005 MHz  
NUC2 1H  
CPDPRG12 waltz164  
PCPD2 80.00 usec  
PLW2 24.45700073 W  
PLW2.2 0.24457000 W  
PLW2.3 0.12302000 W

F2 - Processing parameters  
SI 65536  
SF 125.7578060 MHz  
WDW EM  
SSB 0  
LB 2.00 Hz  
GB 0  
PC 1.40

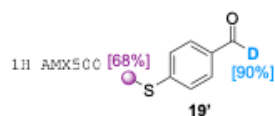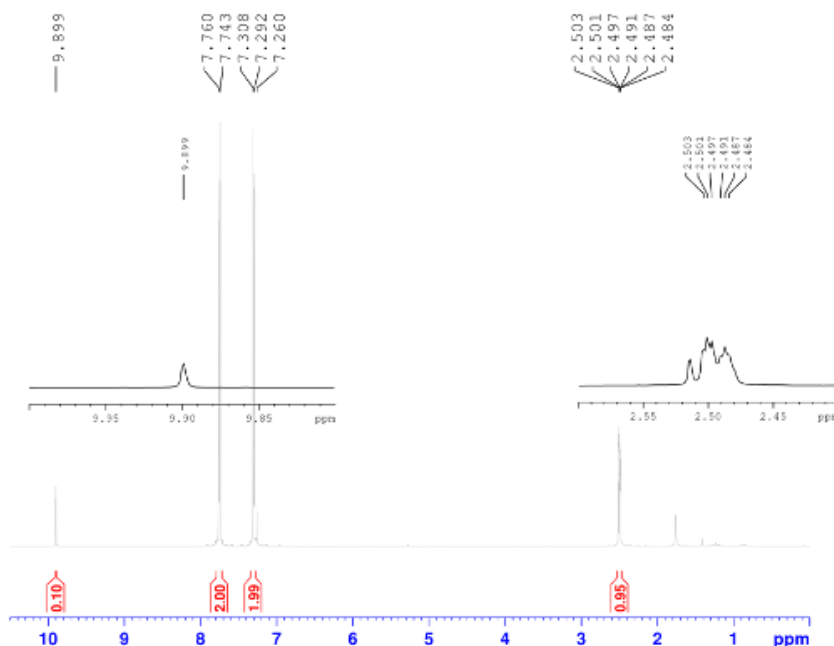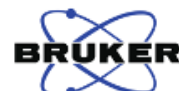

Current Data Parameters  
NAME yk1224-ky1-4112-6-1  
EXPNO 1  
PROCNO 1

F2 - Acquisition Parameters  
Date\_ 20191224  
Time 20.47  
INSTRUM spect  
PROBHD 5 mm PABBO BB/  
PULPROG zg30  
TD 32768  
SOLVENT CDCl3  
NS 8  
DS 0  
SMH 10330.578 Hz  
FIDRES 0.315264 Hz  
AQ 1.5059712 sec  
RG 90.5  
FM 68.400 usec  
DE 6.00 usec  
TE 297.0 K  
D1 1.00000000 sec  
TD0 1

===== CHANNEL f1 =====  
NUC1 1H  
P1 10.50 usec  
PL1 0.25 dB  
SFO1 500.133085 MHz  
F2 - Processing parameters  
SI 16384  
SF 500.1300130 MHz  
WDW EM  
SSB 0  
LB 0.30 Hz  
GB 0  
PC 1.00

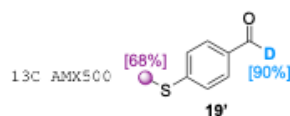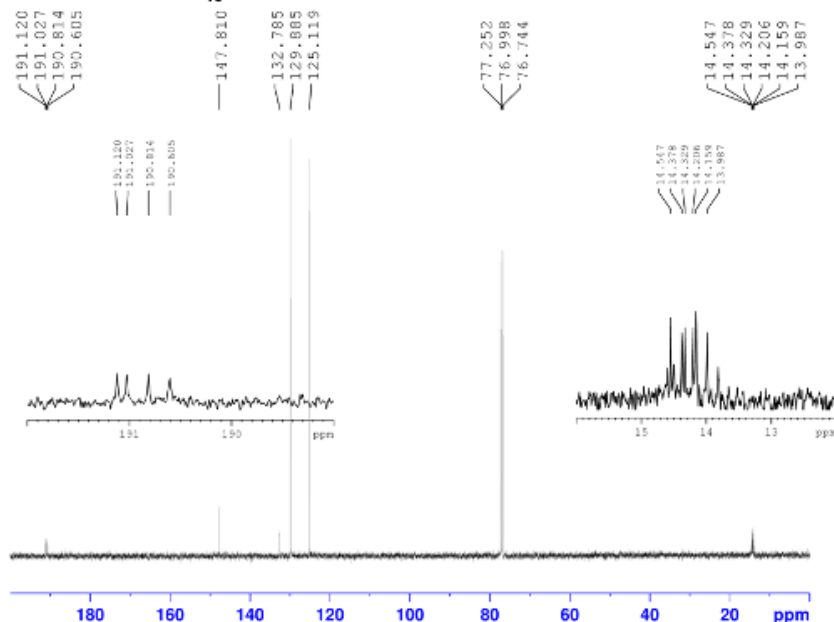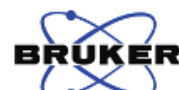

Current Data Parameters  
NAME yk1224-ky1-4112-6-1  
EXPNO 2  
PROCNO 1

F2 - Acquisition Parameters  
Date\_ 20191224  
Time 20.48  
INSTRUM spect  
PROBHD 5 mm PABBO BB/  
PULPROG zgpg30  
TD 65536  
SOLVENT CDCl3  
NS 75  
DS 0  
SMH 30030.029 Hz  
FIDRES 0.458222 Hz  
AQ 1.0911744 sec  
RG 16384  
FM 16.650 usec  
DE 6.00 usec  
TE 297.3 K  
D1 2.00000000 sec  
d11 0.03000000 sec  
DETA 1.85999998 sec  
TD0 20

===== CHANNEL f1 =====  
NUC1 13C  
P1 8.90 usec  
PL1 0 dB  
SFO1 125.7709936 MHz  
===== CHANNEL f2 =====  
CPDPRG2 waltz16  
NUC2 1H  
PCPD2 80.00 usec  
PL2 0.25 dB  
PL12 17.89 dB  
PL13 15.83 dB  
SFO2 500.1320005 MHz

F2 - Processing parameters  
SI 32768  
SF 125.7578007 MHz  
WDW EM  
SSB 0  
LB 1.00 Hz  
GB 0  
PC 1.40

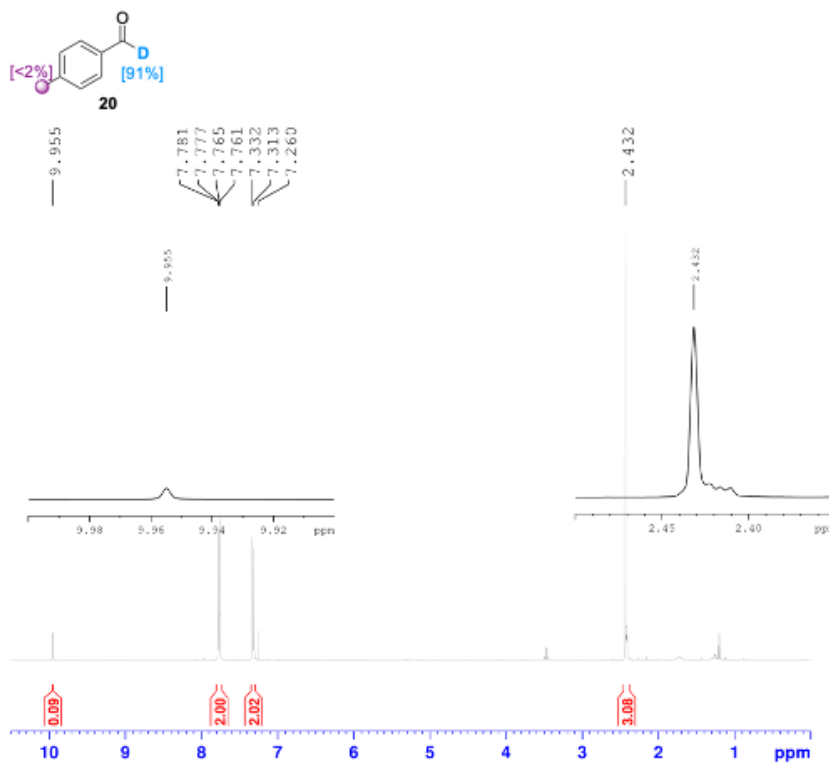

**BRUKER**

Current Data Parameters  
 Date\_ 20151225  
 Time 11:18 h  
 INSTRUM spect  
 PROBNR Z108618\_0520  
 FULPROG zg30  
 TD 32768  
 SOLVENT CDCl3  
 NS 8  
 DS 2  
 SWH 8012.820 Hz  
 FIDRES 0.488064 Hz  
 AQ 2.0447233 sec  
 RG 114.07  
 DK 52.400 usec  
 DE 6.50 usec  
 TE 298.6 K  
 D1 1.00000000 sec  
 TDS 1  
 SFO1 400.2324714 MHz  
 NUC1 1H  
 PU 4.57 usec  
 P1 13.70 usec  
 PLW1 14.3955942 N

F2 - Processing parameters  
 SI 45536  
 SF 400.2300102 MHz  
 XDW EM  
 SSB 0  
 LB 0.30 Hz  
 GB 0  
 PC 1.00

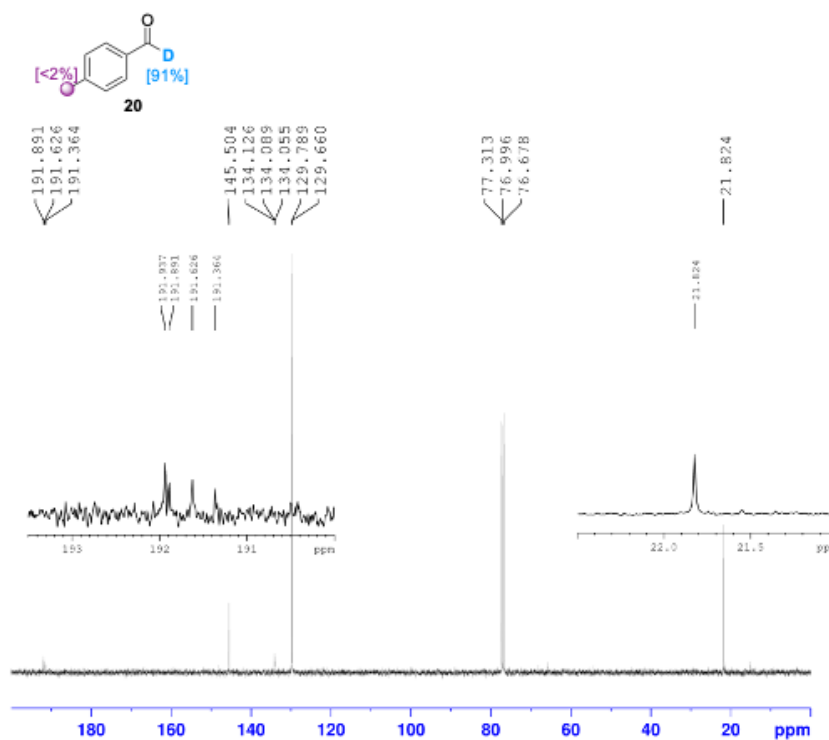

**BRUKER**

Current Data Parameters  
 Date\_ 20151225  
 Time 11:24 h  
 INSTRUM spect  
 PROBNR Z108618\_0520  
 FULPROG zgpg30  
 TD 65536  
 SOLVENT CDCl3  
 NS 100  
 DS 4  
 SWH 24038.461 Hz  
 FIDRES 0.733556 Hz  
 AQ 1.3451488 sec  
 RG 205.55  
 DK 20.800 usec  
 DE 6.50 usec  
 TE 299.4 K  
 D1 2.00000000 sec  
 D11 0.03000000 sec  
 TDS 1  
 SFO1 100.6478773 MHz  
 NUC1 13C  
 PU 3.27 usec  
 P1 8.80 usec  
 PLW1 63.4000153 N  
 SFO2 400.2316009 MHz  
 NUC2 1H  
 CPDPRG2 waltz16  
 F2P2 30.00 usec  
 PLW2 14.3955942 N  
 PLW12 0.32265529 N  
 PLW13 0.16183001 N

F2 - Processing parameters  
 SI 32768  
 SF 100.6279134 MHz  
 XDW EM  
 SSB 0  
 LB 1.00 Hz  
 GB 0  
 PC 1.40

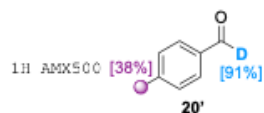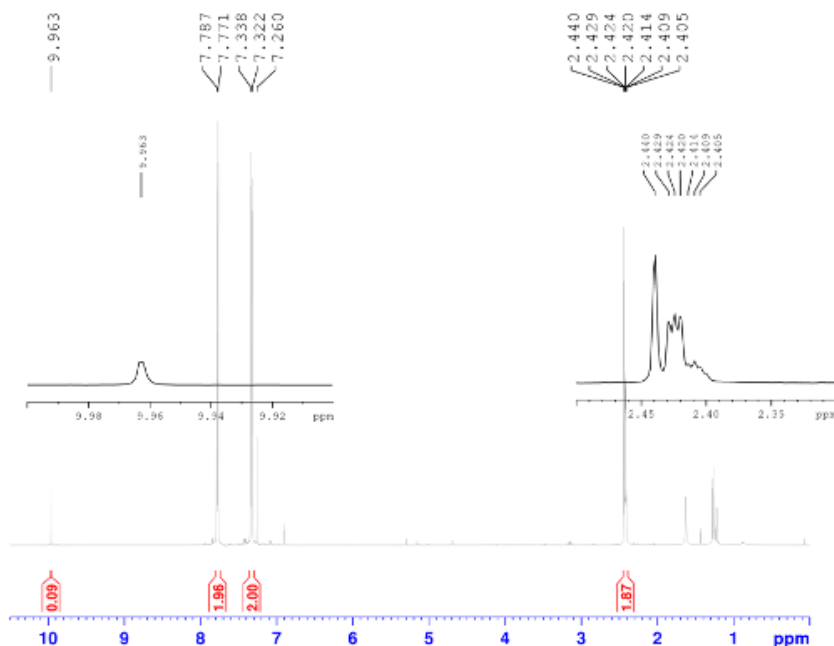

Current Data Parameters  
NAME yx0103-ky1-4119-7-1  
EXPNO 1  
PROCNO 1

F2 - Acquisition Parameters  
Date\_ 2020103  
Time 16.56  
INSTRUM spect  
PROBHD 5 mm PABBO BB/  
PULPROG zgpg30  
TD 32768  
SOLVENT CDCl3  
NS 8  
DS 0  
SMH 10330.578 Hz  
FIDRES 0.315264 Hz  
AQ 1.5859712 sec  
RG 228.1  
DM 48.400 usec  
DE 6.00 usec  
TE 296.2 K  
D1 1.0000000 sec  
TD0 1

===== CHANNEL f1 =====  
NUC1 <sup>1</sup>H  
P1 10.50 usec  
PL1 0.25 dB  
SFO1 500.1330085 MHz  
  
F2 - Processing parameters  
SI 16384  
SF 500.130130 MHz  
WDW EM  
SSB 0  
LB 0.30 Hz  
GB 0  
PC 1.00

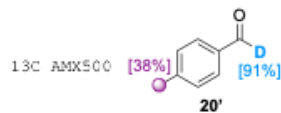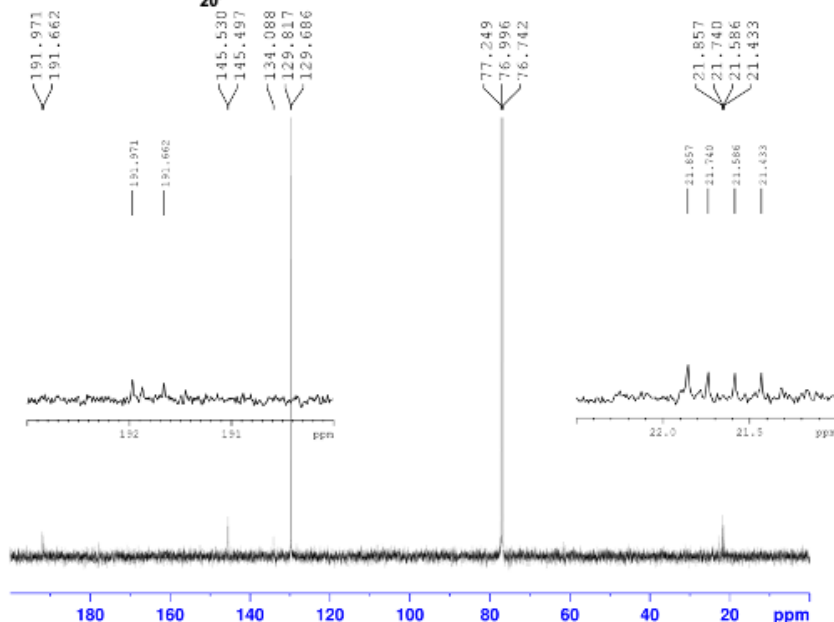

Current Data Parameters  
NAME yx0103-ky1-4119-7-1  
EXPNO 2  
PROCNO 1

F2 - Acquisition Parameters  
Date\_ 2020103  
Time 16.57  
INSTRUM spect  
PROBHD 5 mm PABBO BB/  
PULPROG zgpg30  
TD 65536  
SOLVENT CDCl3  
NS 217  
DS 0  
SMH 30030.029 Hz  
FIDRES 0.458222 Hz  
AQ 1.0911744 sec  
RG 16384  
DM 16.650 usec  
DE 6.00 usec  
TE 296.0 K  
D1 2.0000000 sec  
d11 0.0300000 sec  
DELTA 1.8599999 sec  
TD0 20

===== CHANNEL f1 =====  
NUC1 <sup>13</sup>C  
P1 8.90 usec  
PL1 0 dB  
SFO1 125.7709936 MHz  
  
===== CHANNEL f2 =====  
CPDPRG2 waltz16  
NUC2 <sup>1</sup>H  
PCPD2 80.00 usec  
PL2 0.25 dB  
PL12 17.89 dB  
PL13 15.83 dB  
SFO2 500.1320005 MHz

F2 - Processing parameters  
SI 32768  
SF 125.7577936 MHz  
WDW EM  
SSB 0  
LB 1.00 Hz  
GB 0  
PC 1.40

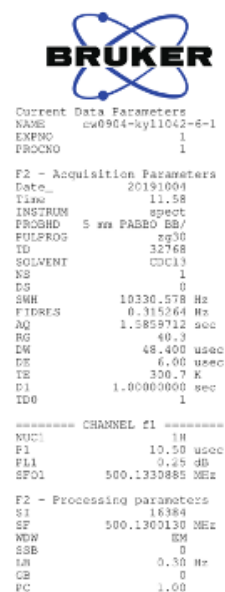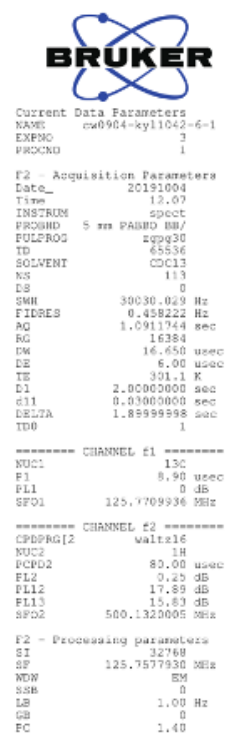

2H AV 500 NEO 23 May 2017 D NMR in CHCl3

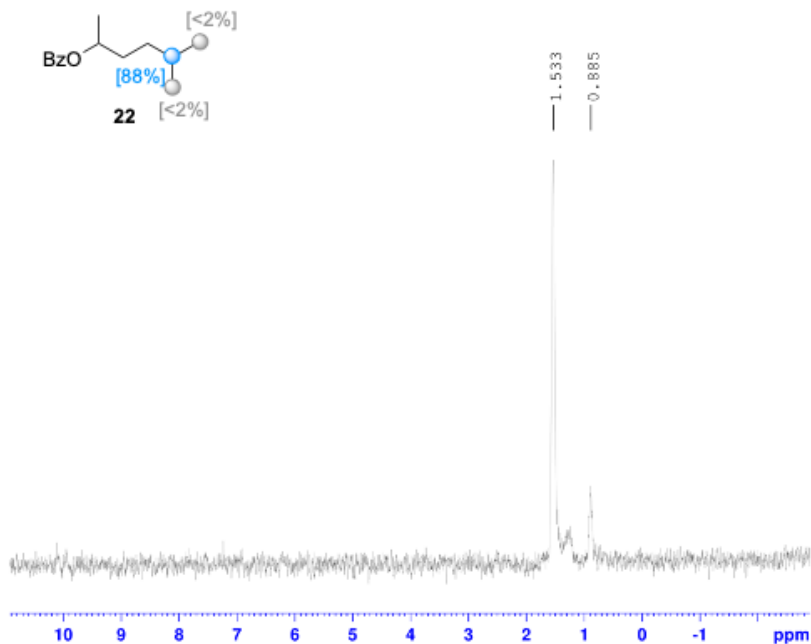

**BRUKER**

Current Data Parameters  
NAME thd-4  
EXPNO 2  
PROCNO 1

F2 - Acquisition Parameters  
Date\_ 20200624  
Time 15.17 h  
INSTRUM CAB AV4 500 MHS BASIC  
PROBHD Z144369\_0005 1  
PULPROG zgpg30.2  
TD 8192  
SOLVENT CDCl3  
NS 8  
DS 2  
SWH 1562.000 Hz  
FIDRES 0.381470 Hz  
AQ 2.6214399 sec  
RG 12.5  
DN 320.000 usec  
DE 5.50 usec  
TE 295.0 K  
D1 1.00000000 sec  
D11 0.03000000 sec  
TD0  
SFO1 76.7885582 MHz  
NUC1 2H  
P1 349.30 usec  
PLW1 3.50000000 W

F2 - Processing parameters  
SI 65536  
SF 76.7885502 MHz  
XPD 8M  
SSB 0  
LB 0.30 Hz  
GB 0  
PC 1.00

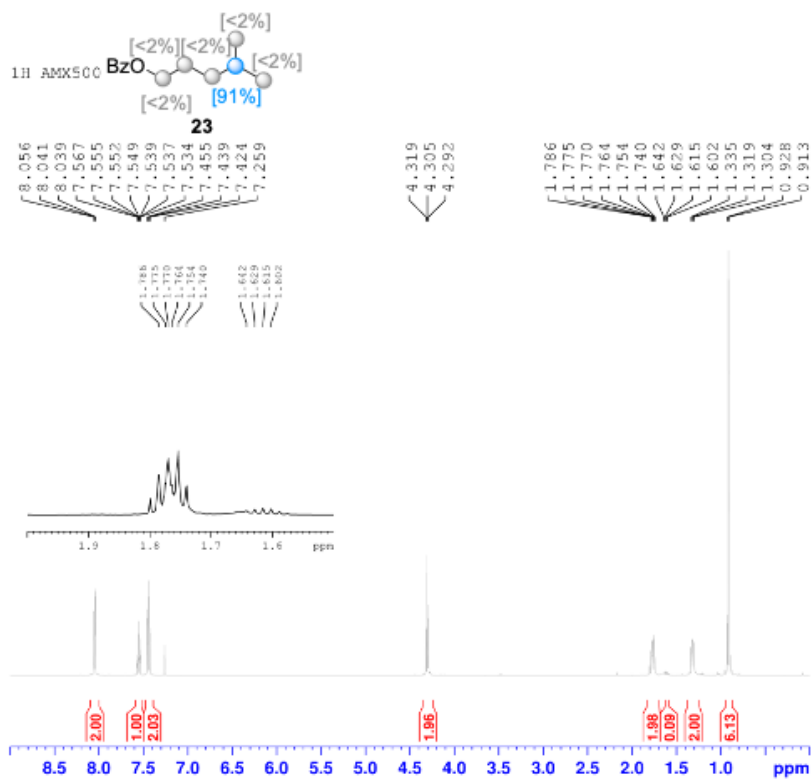

**BRUKER**

Current Data Parameters  
NAME yk0222-kyl-4021-2  
EXPNO 1  
PROCNO 1

F2 - Acquisition Parameters  
Date\_ 20200222  
Time 10.18  
INSTRUM spect  
PROBHD 5 mm PABBO BB/  
PULPROG zgpg30  
TD 32768  
SOLVENT CDCl3  
NS 8  
DS 0  
SWH 10330.578 Hz  
FIDRES 0.315264 Hz  
AQ 1.5859712 sec  
RG 71.8  
DN 48.400 usec  
DE 6.00 usec  
TE 296.4 K  
D1 1.00000000 sec  
TD0 1

===== CHANNEL f1 =====  
NUC1 1H  
P1 10.50 usec  
PL1 0.25 dB  
SFO1 500.1330085 MHz

F2 - Processing parameters  
SI 16384  
SF 500.1300137 MHz  
WDW EM  
SSB 0  
LB 0.30 Hz  
GB U  
PC 1.00

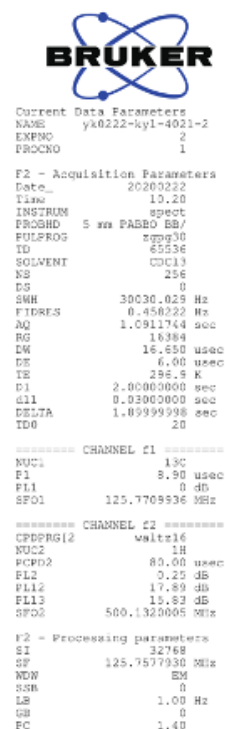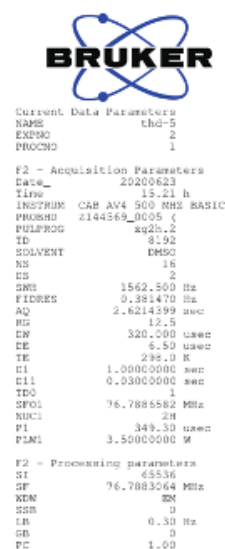

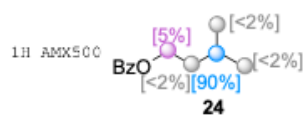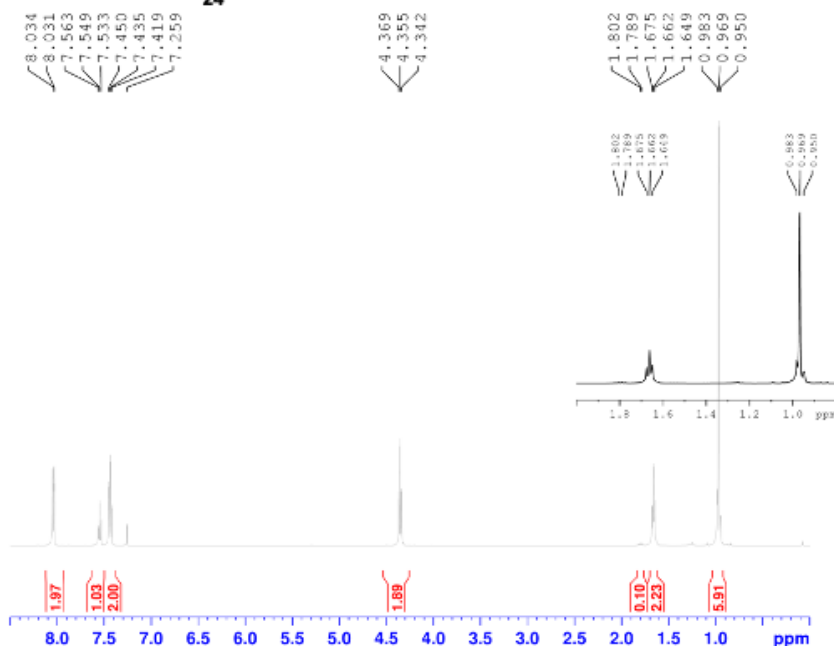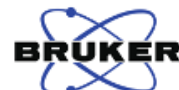

Current Data Parameters  
NAME yx0914-kyl-3198-2-1  
EXPNO 1  
PROCNO 1

F2 - Acquisition Parameters  
Date\_ 20190914  
Time 17.07  
INSTRUM spect  
PROBHD 5 mm PABBO BB/  
PULPROG zgpg30  
TD 32768  
SOLVENT CDCl3  
NS 8  
DS 0  
SMH 10330.578 Hz  
FIDRES 0.315264 Hz  
AQ 1.5859712 sec  
RG 128  
DM 68.400 usec  
DE 6.00 usec  
TE 296.2 K  
D1 1.00000000 sec  
TD0 1

===== CHANNEL f1 =====  
NUC1 <sup>1</sup>H  
P1 10.50 usec  
PL1 0.25 dB  
SFO1 500.1330085 MHz  
F2 - Processing parameters  
SI 16384  
SF 500.1300136 MHz  
WDW EM  
SSB 0  
LB 0.30 Hz  
GB 0  
PC 1.00

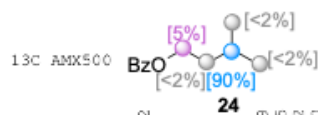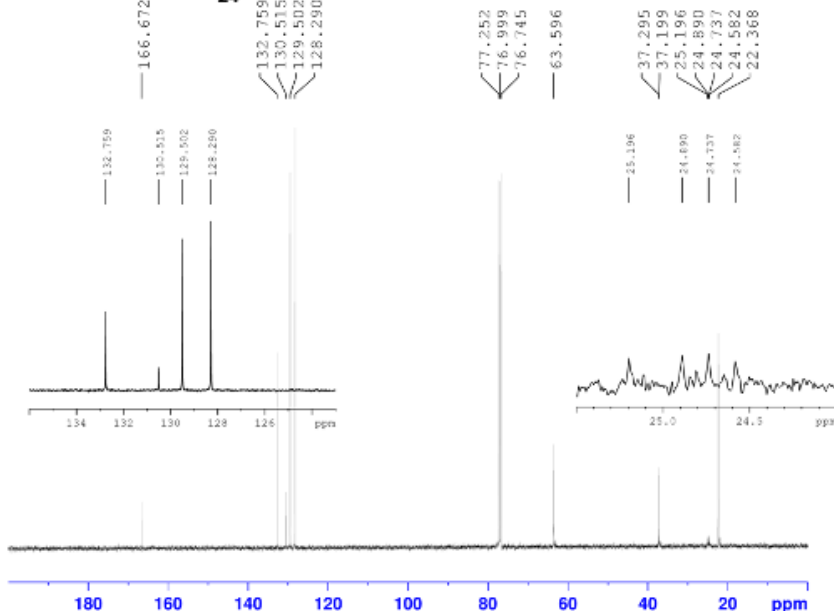

Current Data Parameters  
NAME yx0914-kyl-3198-2-1  
EXPNO 2  
PROCNO 1

F2 - Acquisition Parameters  
Date\_ 20190914  
Time 17.07  
INSTRUM spect  
PROBHD 5 mm PABBO BB/  
PULPROG zgpg30  
TD 65536  
SOLVENT CDCl3  
NS 360  
DS 0  
SMH 30030.029 Hz  
FIDRES 0.458222 Hz  
AQ 1.0911744 sec  
RG 16384  
DM 16.650 usec  
DE 6.00 usec  
TE 296.2 K  
D1 2.00000000 sec  
d11 0.03000000 sec  
DELTA 1.85999998 sec  
TD0 20

===== CHANNEL f1 =====  
NUC1 <sup>13</sup>C  
P1 8.90 usec  
PL1 0 dB  
SFO1 125.7709936 MHz  
===== CHANNEL f2 =====  
CPDPRG2 waltz16  
NUC2 <sup>1</sup>H  
PCPD2 80.00 usec  
PL2 0.25 dB  
PL12 17.89 dB  
PL13 15.83 dB  
SFO2 500.1320005 MHz

F2 - Processing parameters  
SI 32768  
SF 125.7577931 MHz  
WDW EM  
SSB 0  
LB 1.00 Hz  
GB 0  
PC 1.40

2H AV 500 NEO 23 May 2017 D NMR in CHCl3

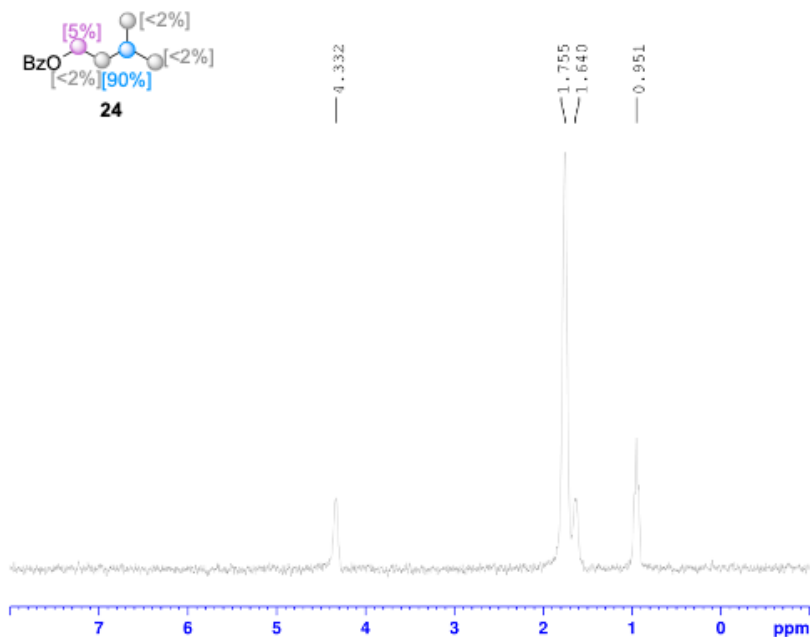

Current Data Parameters  
NAME thd-5  
EXPNO 2  
PROCNO 1

F2 - Acquisition Parameters  
Date\_ 20200624  
Time 16.19 h  
INSTRUM CPM AV4 500 MHz BASIC  
PROBHD Z144S69-0005 (g2h.2  
PULPROG zgpg30  
TD 65536  
SOLVENT CDCl3  
NS 8  
DS 0  
SWH 1562.500 Hz  
FIDRES 0.381470 Hz  
AQ 2.6214399 sec  
RG 12.5  
EW 320.000 usec  
DE 6.50 usec  
TE 298.0 K  
D1 1.00000000 sec  
d11 0.03000000 sec  
TD0 1  
SFO1 76.7885582 MHz  
NUC1 1H  
P1 349.30 usec  
PL1 3.50000000 W

F2 - Processing parameters  
SI 65536  
SF 76.7885510 MHz  
RG 8  
SSB 0  
LB 0.30 Hz  
GB 0  
PC 1.00

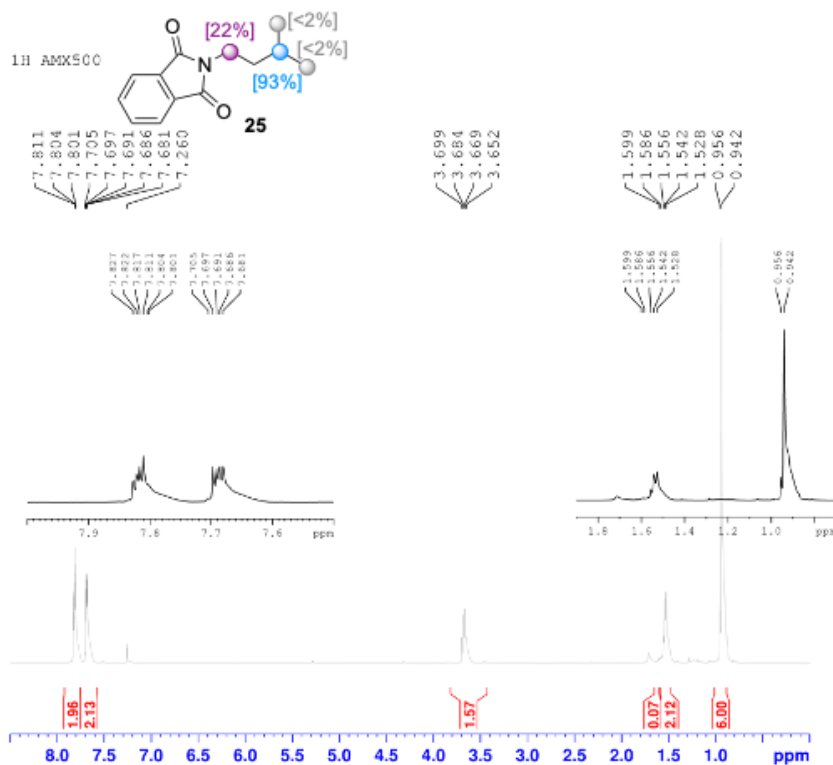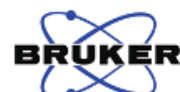

Current Data Parameters  
NAME yx0104-kyl-4120-4-1  
EXPNO 1  
PROCNO 1

F2 - Acquisition Parameters  
Date\_ 20200104  
Time 16.08  
INSTRUM spect  
PROBHD 5 mm PABBO BB/  
PULPROG zg30  
TD 32768  
SOLVENT CDCl3  
NS 8  
DS 0  
SWH 10330.570 Hz  
FIDRES 0.215264 Hz  
AQ 1.5859712 sec  
RG 80.6  
EW 48.400 usec  
DE 6.00 usec  
TE 295.0 K  
D1 1.00000000 sec  
TD0 1

===== CHANNEL f1 =====  
NUC1 1H  
P1 10.50 usec  
PL1 0.25 dB  
SFO1 500.1330885 MHz

F2 - Processing parameters  
SI 16384  
SF 500.1300147 MHz  
RG 8  
SSB 0  
LB 0.30 Hz  
GB 0  
PC 1.00

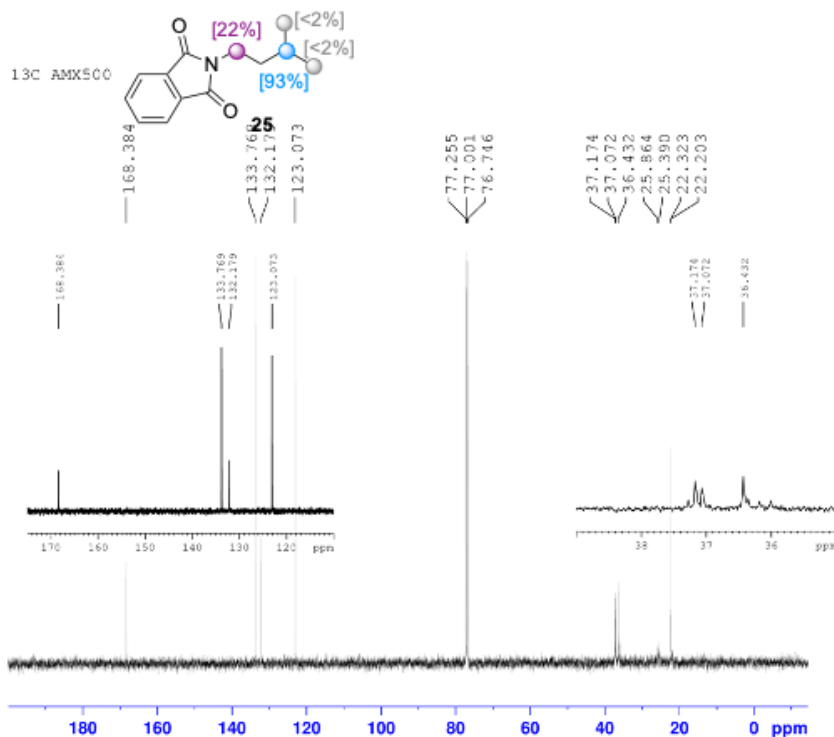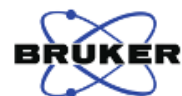

Current Data Parameters  
NAME: yk0104-kyl-4120-4-1  
EXPNO: 2  
PROCNO: 1

F2 - Acquisition Parameters  
Date\_: 20200104  
Time: 16.09  
INSTRUM: spect  
PROBHD: 5 mm PABBO MM/  
PULPROG: zgpg30  
TD: 65536  
SOLVENT: CDCl3  
NS: 104  
DS: 0  
SWH: 30030.029 Hz  
FIDRES: 0.458222 Hz  
AQ: 1.0911744 sec  
RG: 16384  
DM: 16.650 usec  
DE: 6.00 usec  
TE: 296.0 K  
D1: 2.00000000 sec  
c11: 0.03000000 sec  
DELTA: 1.85999998 sec  
TD0: 20

===== CHANNEL f1 =====  
NUC1: <sup>13</sup>C  
P1: 8.90 usec  
PL1: 0 dB  
SFO1: 125.7709336 MHz

===== CHANNEL f2 =====  
CPDPRG2: waltz16  
NUC2: <sup>1</sup>H  
PCPD2: 80.00 usec  
PL2: 0.25 dB  
PL12: 17.89 dB  
PL13: 15.83 dB  
SFO2: 500.1320005 MHz

F2 - Processing parameters  
SI: 32768  
SF: 125.7577942 MHz  
WDW: EM  
SSB: 0  
LB: 1.00 Hz  
GB: 0  
PC: 1.40

**<sup>1</sup>H AV 500 NEO 23 May 2017 D NMR in CHCl3**

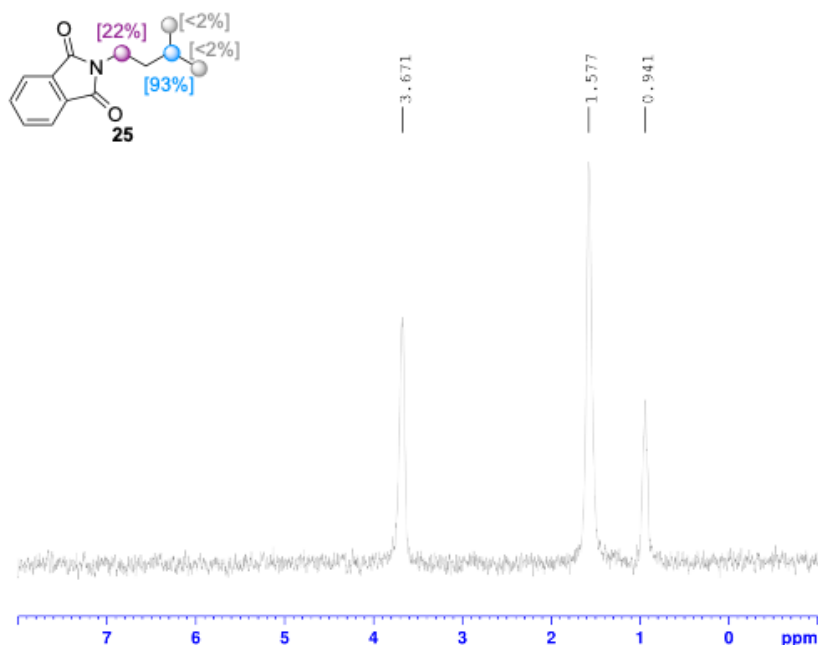

Current Data Parameters  
NAME: thd-7  
EXPNO: 2  
PROCNO: 1

F2 - Acquisition Parameters  
Date\_: 20200624  
Time: 16.21 h  
INSTRUM: CRR AVX 500 MHS BASIC  
PROBHD: z144569\_0005  
PULPROG: zg2h.2  
TD: 8192  
SOLVENT: CDCl3  
NS: 16  
DS: 2  
SWH: 1562.500 Hz  
FIDRES: 0.381470 Hz  
AQ: 2.6214399 sec  
RG: 12.5  
DM: 320.000 usec  
DE: 6.50 usec  
TE: 296.0 K  
D1: 1.00000000 sec  
c11: 0.03000000 sec  
TD0: 1  
SFO1: 76.7885582 MHz  
NUC1: <sup>1</sup>H  
P1: 349.30 usec  
PL1: 3.50000000 W

F2 - Processing parameters  
SI: 65536  
SF: 76.7883510 MHz  
WDW: RM  
SSB: 0  
LB: 0.30 Hz  
GB: 0  
PC: 1.00

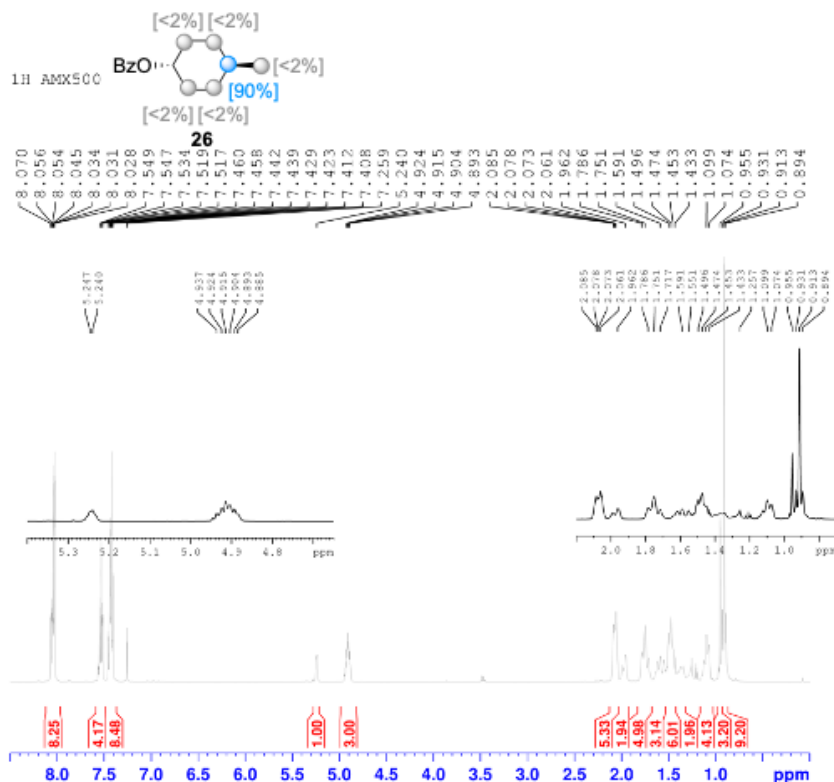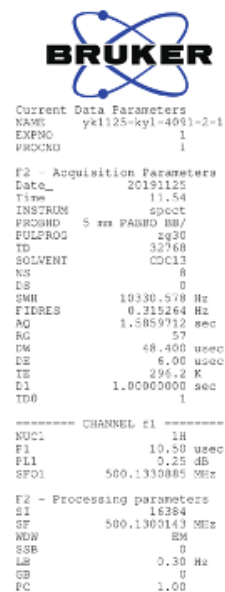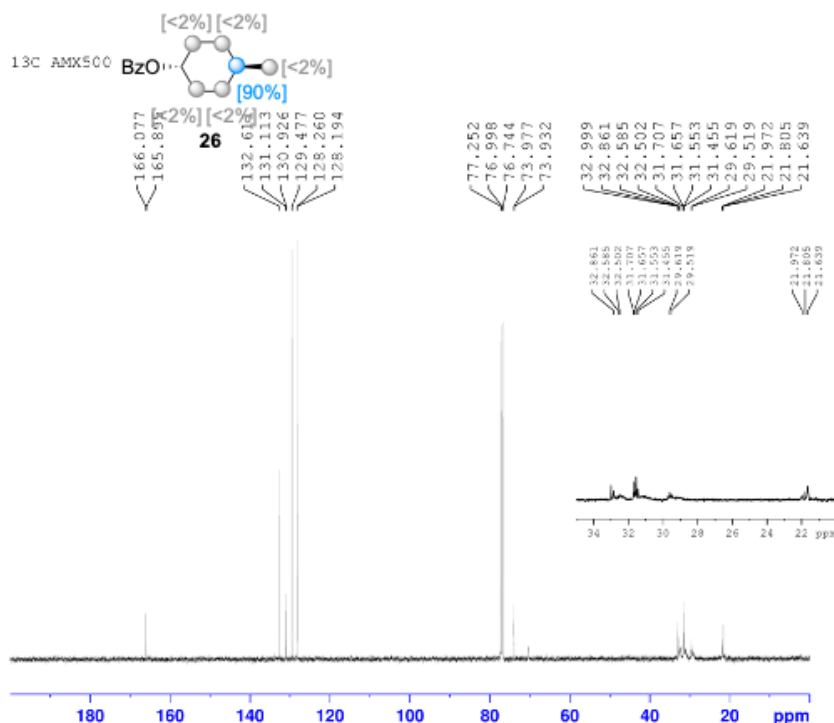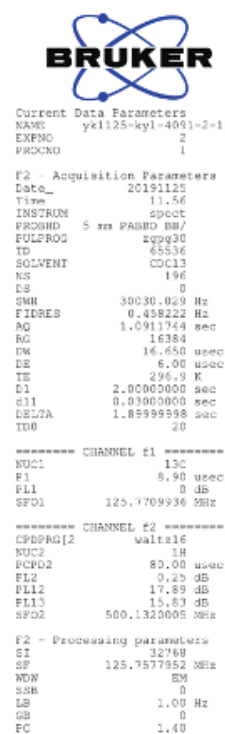

2H AV 500 NEO 23 May 2017 D NMR in CHCl3

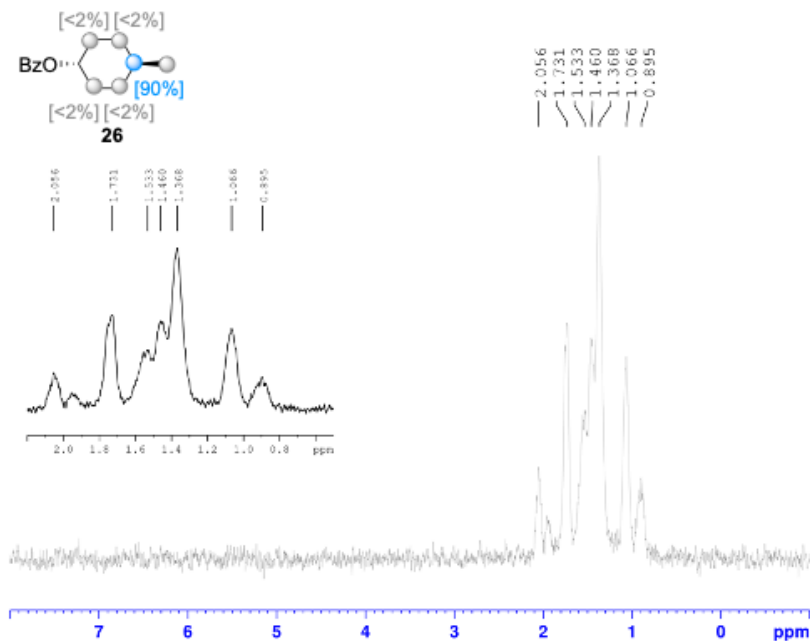

Current Data Parameters  
NAME thd-5  
EXPNO 2  
PROCNO 1

F2 - Acquisition Parameters  
Date\_ 20200624  
Time 15.24 h  
INSTRUM CPM AV4 500 MHz BASIC  
PROBHD Z144369\_0005 (4  
PULPROG zgpg30  
TD 65536  
SOLVENT CDCl3  
NS 16  
DS 2  
SWH 1562.500 Hz  
FIDRES 0.381470 Hz  
AQ 2.6214399 sec  
RG 13.8589  
EW 320.000 usec  
DE 6.50 usec  
TE 298.0 K  
D1 1.00000000 sec  
d11 0.03000000 sec  
TD0 1  
SFO1 76.7885582 MHz  
NUC1 2H  
P1 349.30 usec  
PL1 3.50000000 W

F2 - Processing parameters  
SI 65536  
SF 76.7883510 MHz  
RG 8  
SSB 0  
LB 0.30 Hz  
GB 0  
PC 1.00

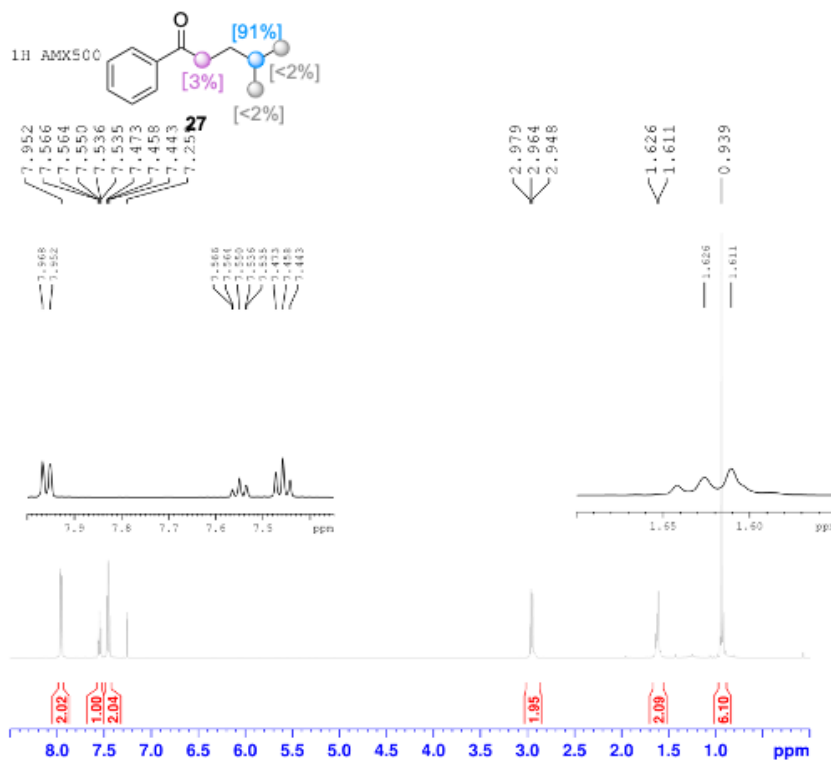

Current Data Parameters  
NAME yx1222=kyl-4059-1-1  
EXPNO 1  
PROCNO 1

F2 - Acquisition Parameters  
Date\_ 20191222  
Time 11.06  
INSTRUM spect  
PROBHD 5 mm PABBO BB/  
PULPROG zgpg30  
TD 65536  
SOLVENT CDCl3  
NS 8  
DS 0  
SWH 10330.570 Hz  
FIDRES 0.315264 Hz  
AQ 1.5859712 sec  
RG 114  
EW 48.400 usec  
DE 6.00 usec  
TE 296.9 K  
D1 1.00000000 sec  
TD0 1

===== CHANNEL f1 =====  
NUC1 1H  
P1 10.50 usec  
PL1 0.25 dB  
SFO1 500.1330885 MHz  
F2 - Processing parameters  
SI 16384  
SF 500.1300143 MHz  
RG 8  
SSB 0  
LB 0.30 Hz  
GB 0  
PC 1.00

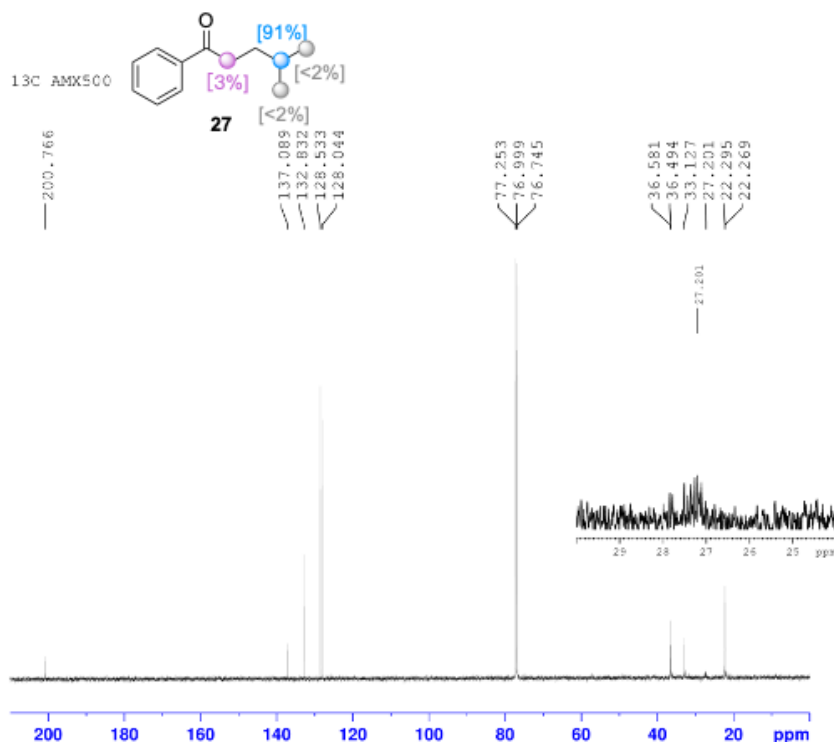

**BRUKER**

Current Data Parameters  
NAME ykl222-ky1-4059-1-1  
EXPNO 2  
PROCNO 1

F2 - Acquisition Parameters  
Date\_ 20191222  
Time 11.08  
INSTRUM spect  
PROBHD 5 mm PABBO BB/  
PULPROG zgpg30  
TD 65536  
SOLVENT CDCl3  
NS 401  
DS 0  
SWH 30030.029 Hz  
FIDRES 0.458222 Hz  
AQ 1.0911744 sec  
RG 16384  
RW 16.650 usec  
DE 6.00 usec  
TE 296.9 K  
D1 2.00000000 sec  
d11 0.03000000 sec  
DELTA 1.89999998 sec  
TD0 20

===== CHANNEL f1 =====  
NUC1 13C  
P1 8.90 usec  
PL1 0 dB  
SFO1 125.7709336 MHz

===== CHANNEL f2 =====  
CPDPRG2 waltz16  
NUC2 1H  
PCPD2 80.00 usec  
PL2 0.25 dB  
PL12 17.89 dB  
PL13 15.83 dB  
SFO2 500.1320005 MHz

F2 - Processing parameters  
SI 32768  
SF 125.7577920 MHz  
WDW EM  
SSB 0  
LB 1.00 Hz  
GB 0  
PC 1.40

2H AV 500 NEO 23 May 2017 D NMR in CHCl3

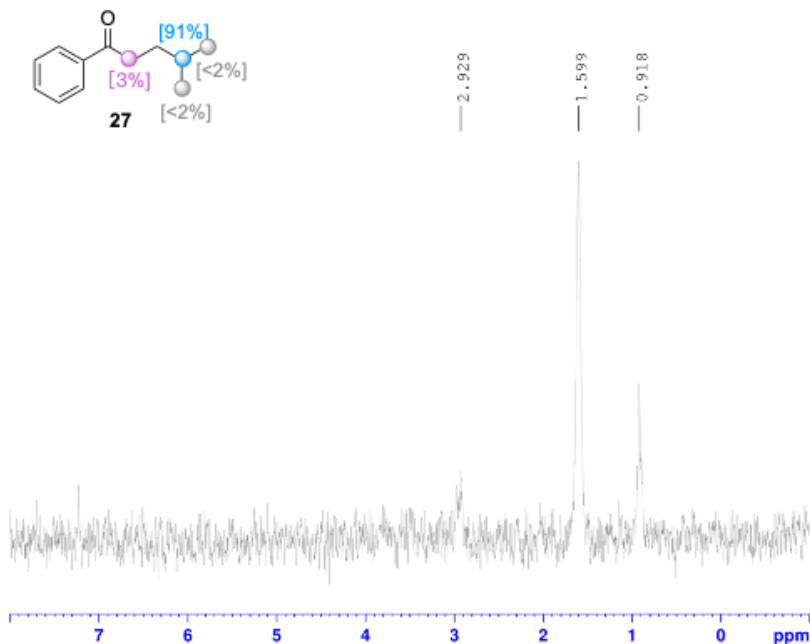

**BRUKER**

Current Data Parameters  
NAME thd-8  
EXPNO 2  
PROCNO 1

F2 - Acquisition Parameters  
Date\_ 20200628  
Time 15.27 h  
INSTRUM CAB AV4 500 MHS BASIC  
PROBHD B144369.0005 1  
PULPROG zgpg30  
TD 8192  
SOLVENT CDCl3  
NS 16  
DS 2  
SWH 1562.000 Hz  
FIDRES 0.381470 Hz  
AQ 2.6214399 sec  
RG 12.5  
RW 320.000 usec  
DE 5.50 usec  
TE 296.9 K  
D1 1.00000000 sec  
d11 0.03000000 sec  
TD0 1  
SFO1 76.7885582 MHz  
NUC1 2H  
P1 349.30 usec  
PLN1 3.50000000 W

F2 - Processing parameters  
SI 65536  
SF 76.7883510 MHz  
WDW EM  
SSB 0  
LB 0.30 Hz  
GB 0  
PC 1.00

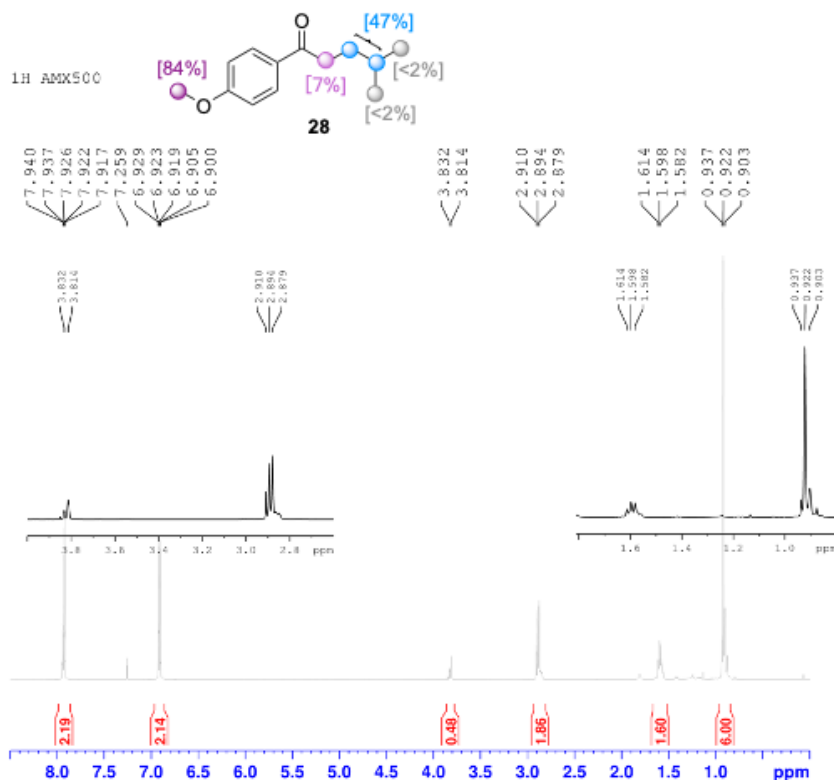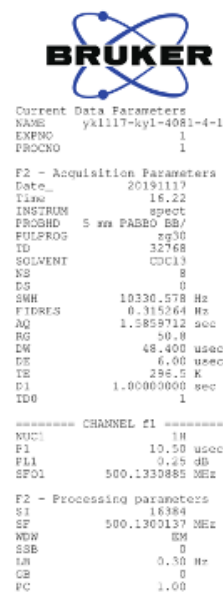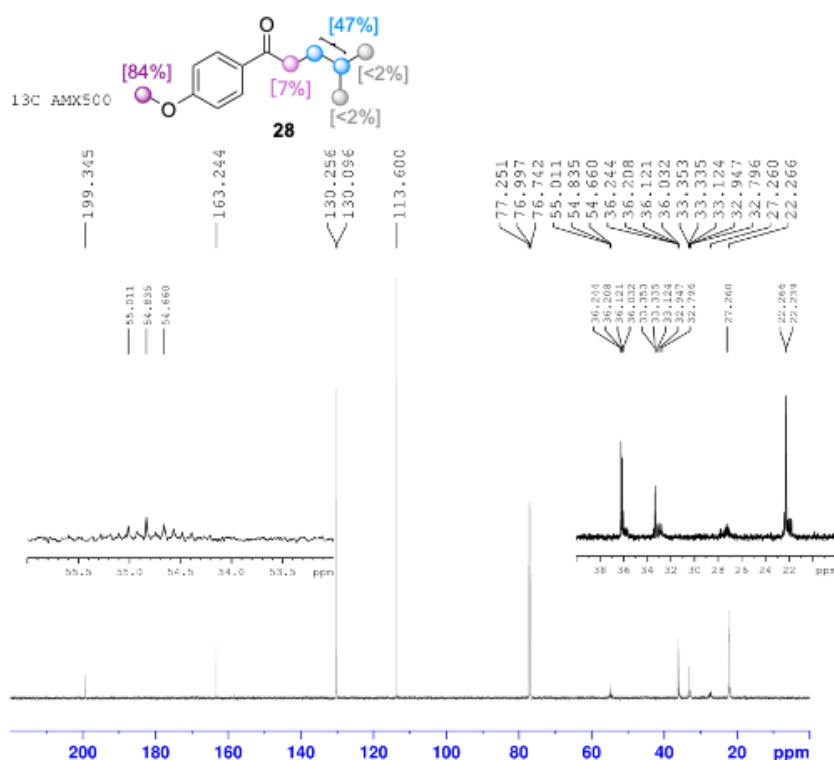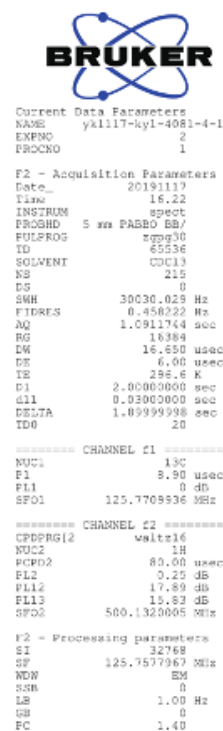

2H AV 500 NEO 23 May 2017 D NMR in CHCl3

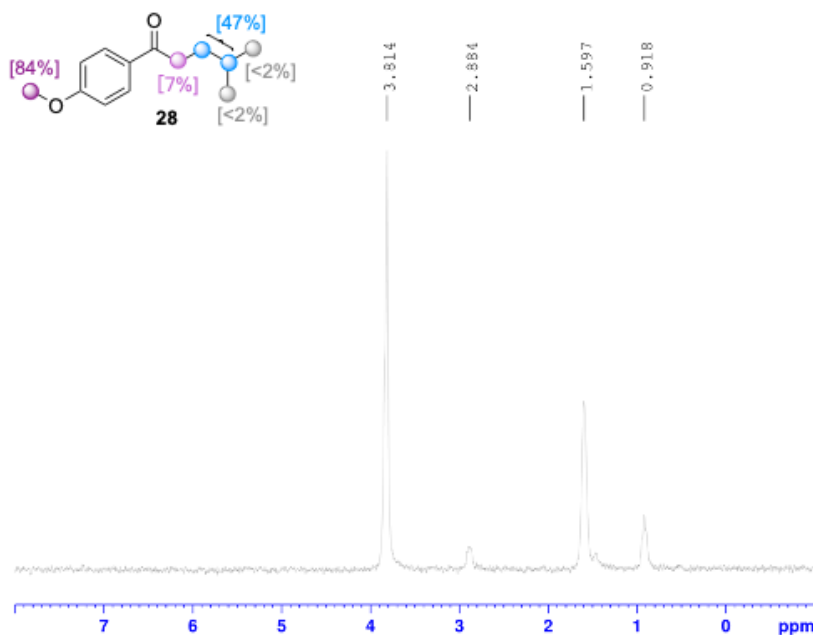

Current Data Parameters  
NAME thd-10  
EXPNO 2  
PROCNO 1

F2 - Acquisition Parameters  
Date\_ 20200624  
Time 15.29 h  
INSTRUM CPM AV4 500 MHz BASIC  
PROBHD Z144369\_0005 (4  
PULPROG zgpg30  
TD 65536  
SOLVENT CDCl3  
NS 8  
DS 2  
SWH 1562.500 Hz  
FIDRES 0.381470 Hz  
AQ 2.6214399 sec  
RG 14.4544  
EW 320.000 usec  
DE 6.50 usec  
TE 298.0 K  
D1 1.00000000 sec  
d11 0.03000000 sec  
TD0 1  
SFO1 76.7885582 MHz  
NUC1 1H  
P1 349.30 usec  
PL1 3.50000000 W

F2 - Processing parameters  
SI 65536  
SF 76.7883510 MHz  
RG 0  
SSB 0  
LB 0.30 Hz  
GB 0  
PC 1.00

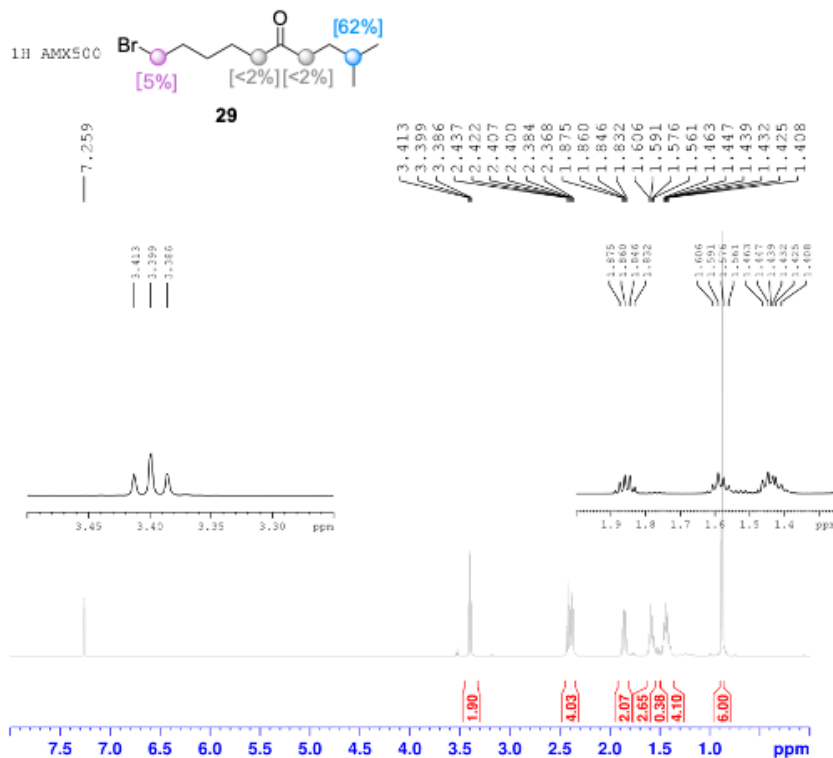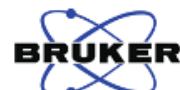

Current Data Parameters  
NAME yk1222-kyl-4110-2-2  
EXPNO 1  
PROCNO 1

F2 - Acquisition Parameters  
Date\_ 20191222  
Time 11.37  
INSTRUM spect  
PROBHD 5 mm PABBO BB/  
PULPROG zgpg30  
TD 32768  
SOLVENT CDCl3  
NS 8  
DS 0  
SWH 10330.578 Hz  
FIDRES 0.315264 Hz  
AQ 1.5859712 sec  
RG 114  
EW 48.400 usec  
DE 6.00 usec  
TE 296.0 K  
D1 1.00000000 sec  
TD0 1

===== CHANNEL f1 =====  
NUC1 1H  
P1 10.50 usec  
PL1 0.25 dB  
SFO1 500.1330885 MHz

F2 - Processing parameters  
SI 16384  
SF 500.1300143 MHz  
RG 0  
SSB 0  
LB 0.30 Hz  
GB 0  
PC 1.00

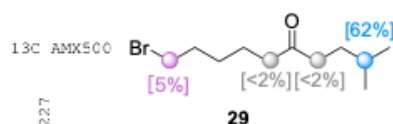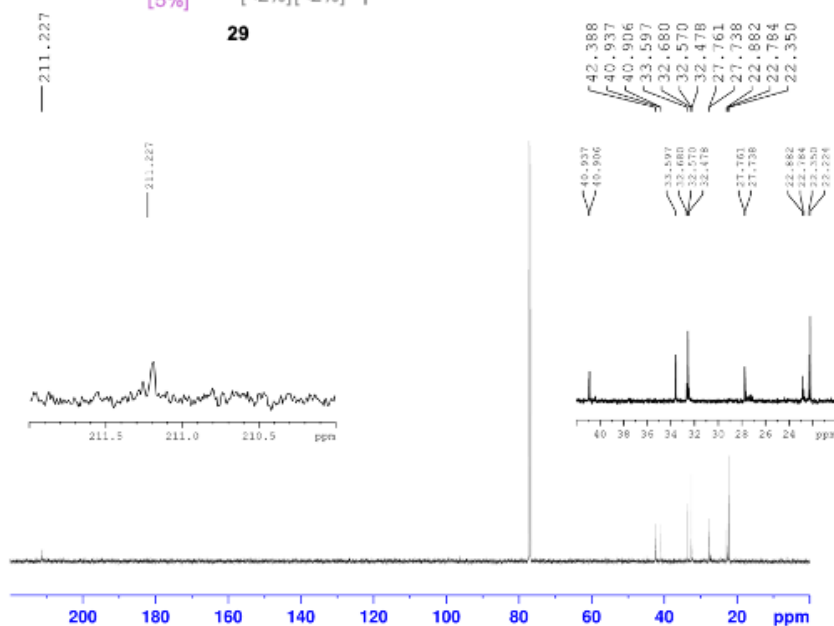

Current Data Parameters  
NAME yk1222-ky1-4110-2-2  
EXPNO 2  
PROCNO 1

F2 - Acquisition Parameters  
Date\_ 20191222  
Time 11.39  
INSTRUM spect  
PROBHD 5 mm PABBO BB/  
PULPROG zgpg30  
TD 65536  
SOLVENT CDCl3  
NS 416  
DS 0  
SMB 30030.029 Hz  
FIDRES 0.458222 Hz  
AQ 1.0911744 sec  
RG 16384  
RM 16.450 usec  
DE 6.00 usec  
TE 297.5 K  
D1 2.0000000 sec  
d11 0.0300000 sec  
DELTA 1.8599998 sec  
TD0 20

===== CHANNEL f1 =====  
NUC1 13C  
P1 8.90 usec  
PL1 0 dB  
SFO1 125.770936 MHz

===== CHANNEL f2 =====  
CPDPRG2 waltz16  
NUC2 1H  
PCPD2 80.00 usec  
PL2 0.25 dB  
PL12 17.89 dB  
PL13 15.83 dB  
SFO2 500.1320005 MHz

F2 - Processing parameters  
SI 32768  
SF 125.7577921 MHz  
WDW EM  
SSB 0  
LB 1.00 Hz  
GB 0  
PC 1.40

2H AV 500 NEO 23 May 2017 D NMR in CHCl3

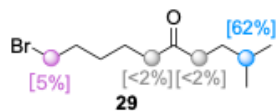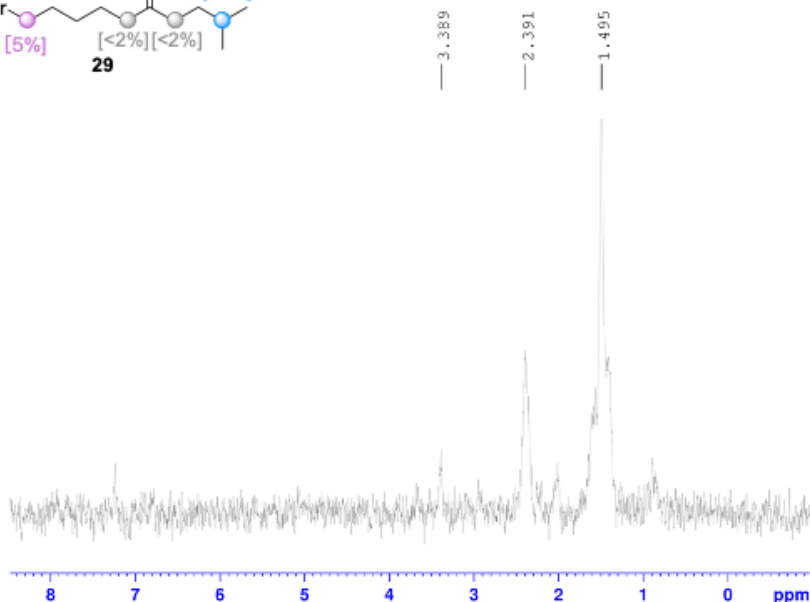

Current Data Parameters  
NAME thd-11  
EXPNO 2  
PROCNO 1

F2 - Acquisition Parameters  
Date\_ 20200624  
Time 16.32 h  
INSTRUM CBR AV4 500 MHS BASIC  
PROBHD z144569\_0005 f  
PULPROG zg2b.2  
TD 8192  
SOLVENT CDCl3  
NS 24  
DS 2  
SMB 1562.500 Hz  
FIDRES 0.381470 Hz  
AQ 2.6214399 sec  
RG 13.8889  
EN 320.000 usec  
TE 6.50 usec  
TE 298.0 K  
D1 1.0000000 sec  
d11 0.0300000 sec  
TD0 1  
SFO1 76.7885582 MHz  
NUC1 2H  
P1 349.30 usec  
PL1 3.5000000 W

F2 - Processing parameters  
SI 65536  
SF 76.7883510 MHz  
WDW BM  
SSB 0  
LB 0.30 Hz  
GB 0  
PC 1.00



2H AV 500 NEO 23 May 2017 D NMR CHCl3

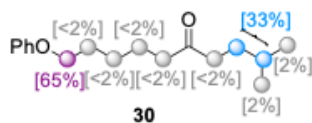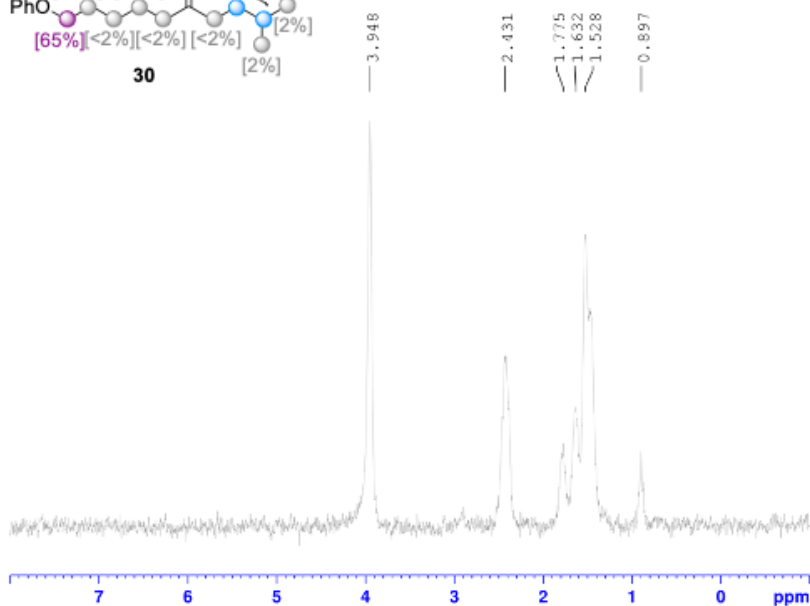

Current Data Parameters  
NAME thd-12  
EXPNO 2  
PROCNO 1

F2 - Acquisition Parameters  
Date\_ 20200624  
Time 16.35 h  
INSTRUM CPM AV4 500 MHz BASIC  
PROBHD Z144S69\_0005 (g2h.2  
PULPROG zgpg30  
TD 65536  
SOLVENT CDCl3  
NS 8  
DS 2  
SWH 1562.500 Hz  
FIDRES 0.381470 Hz  
AQ 2.6214399 sec  
RG 12.5  
CW 320.200 usec  
DE 6.50 usec  
TE 298.0 K  
D1 1.00000000 sec  
d11 0.03000000 sec  
TD0 1  
SFO1 76.788582 MHz  
NUC1 2H  
P1 349.30 usec  
PL1 3.50000000 W

F2 - Processing parameters  
SI 65536  
SF 76.7883485 MHz  
RG 8  
SSB 0  
LB 0.30 Hz  
GB 0  
PC 1.00

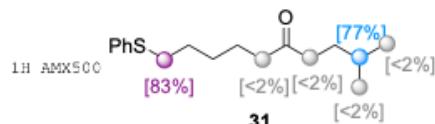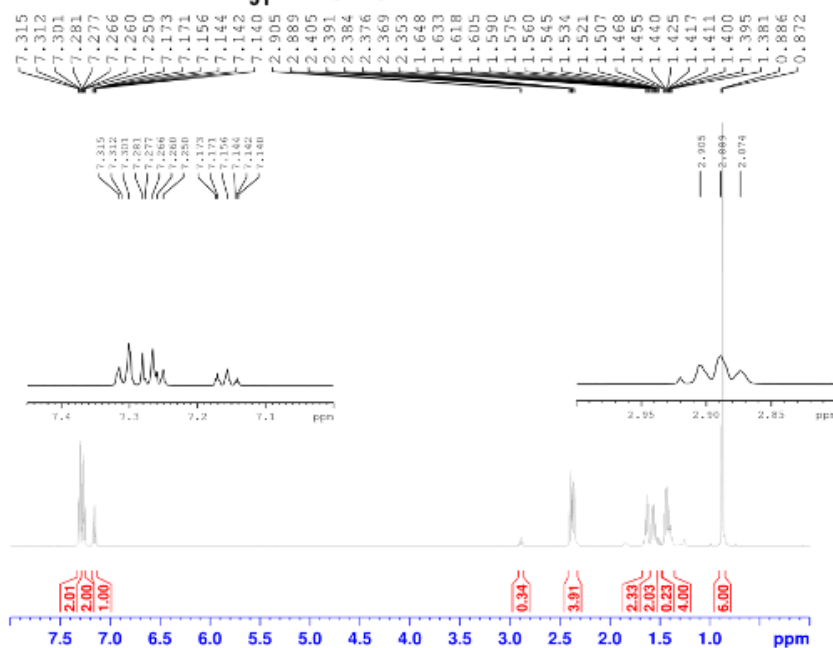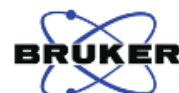

Current Data Parameters  
NAME yll117-kyl-4081-2-1  
EXPNO 1  
PROCNO 1

F2 - Acquisition Parameters  
Date\_ 20191117  
Time 15.50  
INSTRUM spect  
PROBHD 5 mm PABBO BB/  
PULPROG zgpg30  
TD 32768  
SOLVENT CDCl3  
NS 8  
DS 0  
SWH 10330.578 Hz  
FIDRES 0.315264 Hz  
AQ 1.5859712 sec  
RG 57  
CW 48.400 usec  
DE 6.00 usec  
TE 295.3 K  
D1 1.00000000 sec  
TD0 1

===== CHANNEL f1 =====  
NUC1 1H  
P1 10.50 usec  
PL1 0.45 dB  
SFO1 500.1330885 MHz  
F2 - Processing parameters  
SI 16384  
SF 500.1300137 MHz  
RG 64  
SSB 0  
LB 0.30 Hz  
GB 0  
PC 1.00

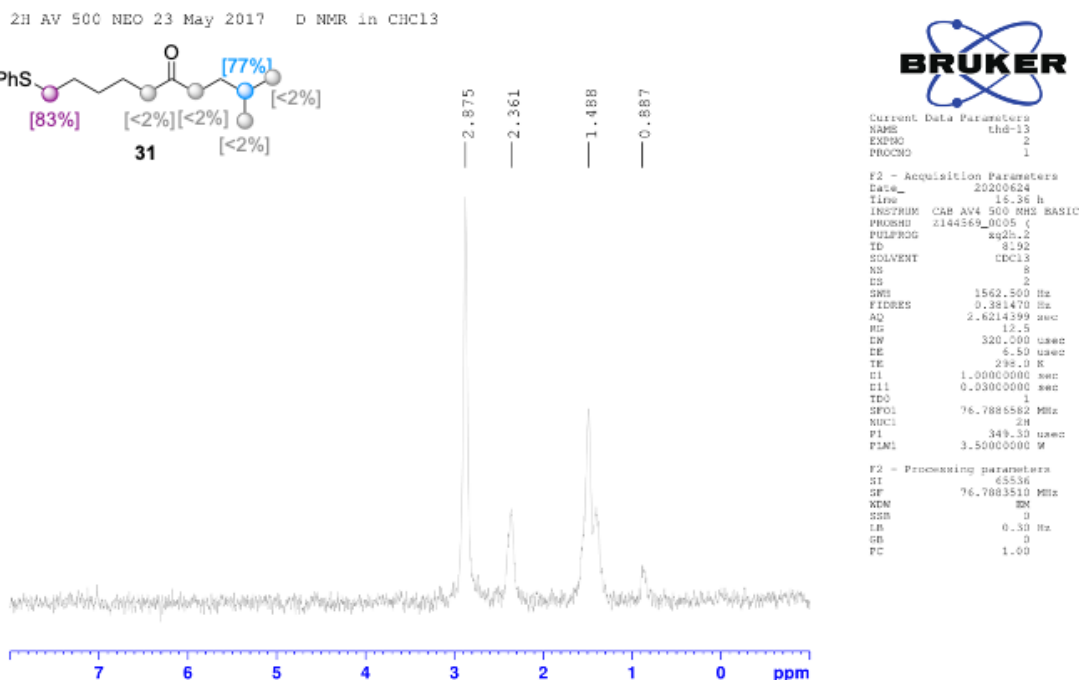

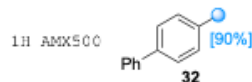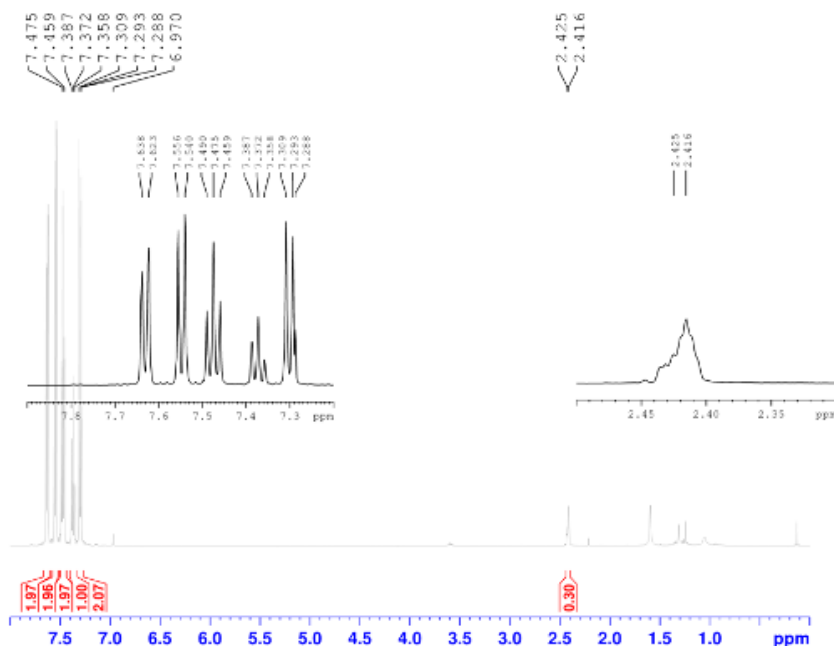

**BRUKER**

Current Data Parameters  
 NAME yk1222-ky1-4076-6-1  
 EXPNO 1  
 PROCNO 1

F2 - Acquisition Parameters  
 Date\_ 20191222  
 Time 10.08  
 INSTRUM spect  
 PROBNM 5 mm PABBO BB/  
 PULPROG zgpg30  
 TD 32768  
 SOLVENT CDCl3  
 NS 8  
 DS 0  
 SMH 10330.570 Hz  
 FIDRES 0.315264 Hz  
 AQ 1.5859712 sec  
 RG 114  
 DM 68.400 usec  
 DE 6.00 usec  
 TE 296.0 K  
 D1 1.00000000 sec  
 D0 1

===== CHANNEL f1 =====  
 NUC1 <sup>1</sup>H  
 P1 10.50 usec  
 PL1 0.25 dB  
 SFO1 500.1330085 MHz

F2 - Processing parameters  
 SI 16384  
 SF 500.1300000 MHz  
 NDW EM  
 SSB 0  
 LB 0.30 Hz  
 GB 0  
 PC 1.00

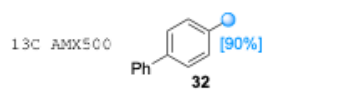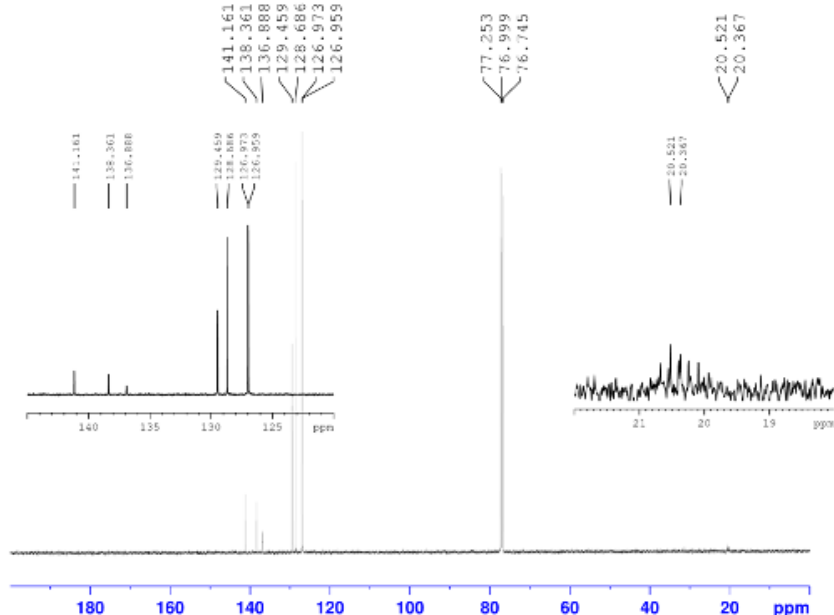

**BRUKER**

Current Data Parameters  
 NAME yk1222-ky1-4076-6-1  
 EXPNO 2  
 PROCNO 1

F2 - Acquisition Parameters  
 Date\_ 20191222  
 Time 10.10  
 INSTRUM spect  
 PROBNM 5 mm PABBO BB/  
 PULPROG zgpg30  
 TD 65536  
 SOLVENT CDCl3  
 NS 597  
 DS 0  
 SMH 30030.029 Hz  
 FIDRES 0.458222 Hz  
 AQ 1.0911744 sec  
 RG 16384  
 DM 16.650 usec  
 DE 6.00 usec  
 TE 297.1 K  
 D1 2.00000000 sec  
 d11 0.03000000 sec  
 DELTA 1.85999998 sec  
 D0 20

===== CHANNEL f1 =====  
 NUC1 <sup>13</sup>C  
 P1 8.90 usec  
 PL1 0 dB  
 SFO1 125.7709936 MHz

===== CHANNEL f2 =====  
 CPDPRG2 waltz16  
 NUC2 <sup>1</sup>H  
 PCPD2 80.00 usec  
 PL2 0.25 dB  
 PL12 17.89 dB  
 PL13 15.83 dB  
 SFO2 500.1320005 MHz

F2 - Processing parameters  
 SI 32768  
 SF 125.7577947 MHz  
 NDW EM  
 SSB 0  
 LB 1.00 Hz  
 GB 0  
 PC 1.40

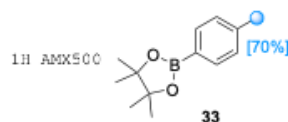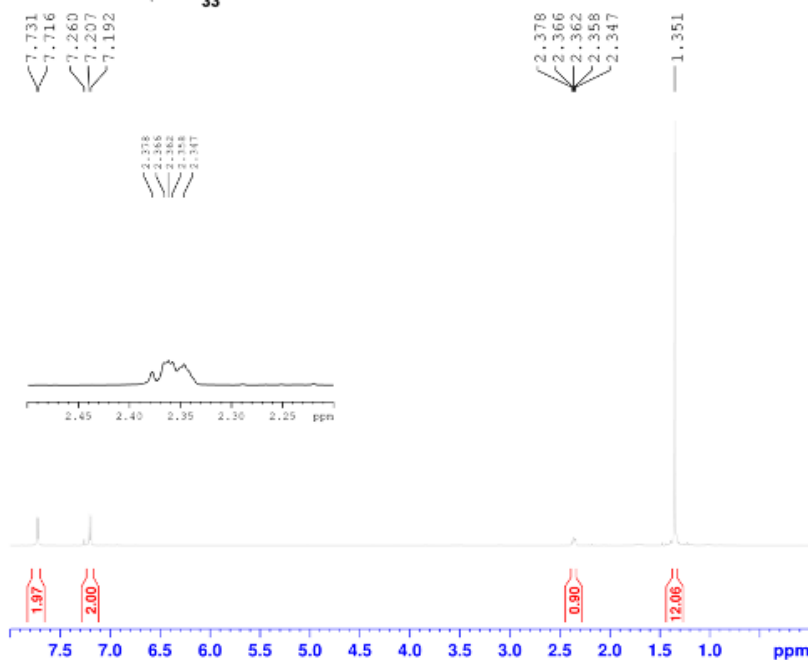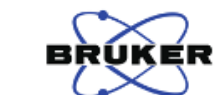

Current Data Parameters  
NAME yk0113-ky1-4126-6-1  
EXPNO 1  
PROCNO 1

F2 - Acquisition Parameters  
Date\_ 20201113  
Time 20.42  
INSTRUM spect  
PROBHD 5 mm PABBO BB/  
PULPROG zgpg30  
TD 32768  
SOLVENT CDCl3  
NS 8  
DS 0  
SWH 10330.570 Hz  
FIDRES 0.315264 Hz  
AQ 1.5859712 sec  
RG 45.3  
RW 48.400 usec  
DE 6.00 usec  
TE 296.0 K  
D1 1.00000000 sec  
TD0 1

===== CHANNEL f1 =====  
NUC1 <sup>1</sup>H  
P1 10.50 usec  
PL1 0.25 dB  
SFO1 500.1330085 MHz

F2 - Processing parameters  
SI 16384  
SF 500.1300135 MHz  
WDW EM  
SSB 0  
LB 0.30 Hz  
GB 0  
PC 1.00

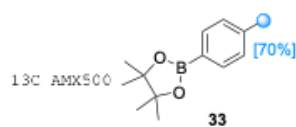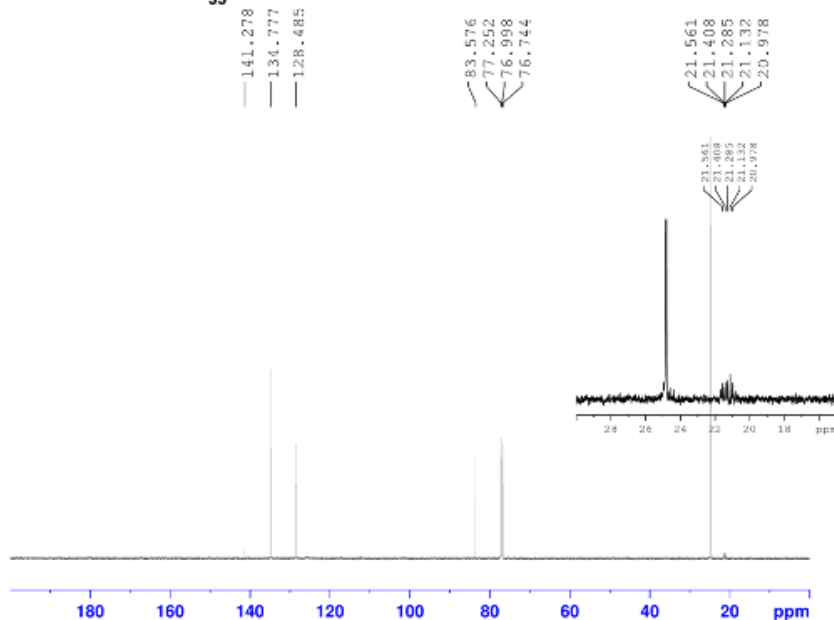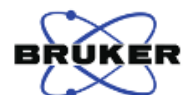

Current Data Parameters  
NAME yk0113-ky1-4126-6-1  
EXPNO 2  
PROCNO 1

F2 - Acquisition Parameters  
Date\_ 20201113  
Time 20.43  
INSTRUM spect  
PROBHD 5 mm PABBO BB/  
PULPROG zgpg30  
TD 65536  
SOLVENT CDCl3  
NS 147  
DS 0  
SWH 30030.029 Hz  
FIDRES 0.456222 Hz  
AQ 1.0911744 sec  
RG 16384  
RW 16.650 usec  
DE 6.00 usec  
TE 297.1 K  
D1 2.00000000 sec  
d11 0.03000000 sec  
DELTA 1.09999998 sec  
TD0 20

===== CHANNEL f1 =====  
NUC1 <sup>13</sup>C  
P1 8.90 usec  
PL1 0 dB  
SFO1 125.7709536 MHz

===== CHANNEL f2 =====  
CPDPRG12 waltz16  
NUC2 <sup>1</sup>H  
PCPD2 80.00 usec  
PL2 0.25 dB  
PL12 17.89 dB  
PL13 15.83 dB  
SFO2 500.1320005 MHz

F2 - Processing parameters  
SI 32768  
SF 125.7577956 MHz  
WDW EM  
SSB 0  
LB 1.00 Hz  
GB 0  
PC 1.40

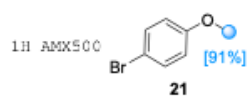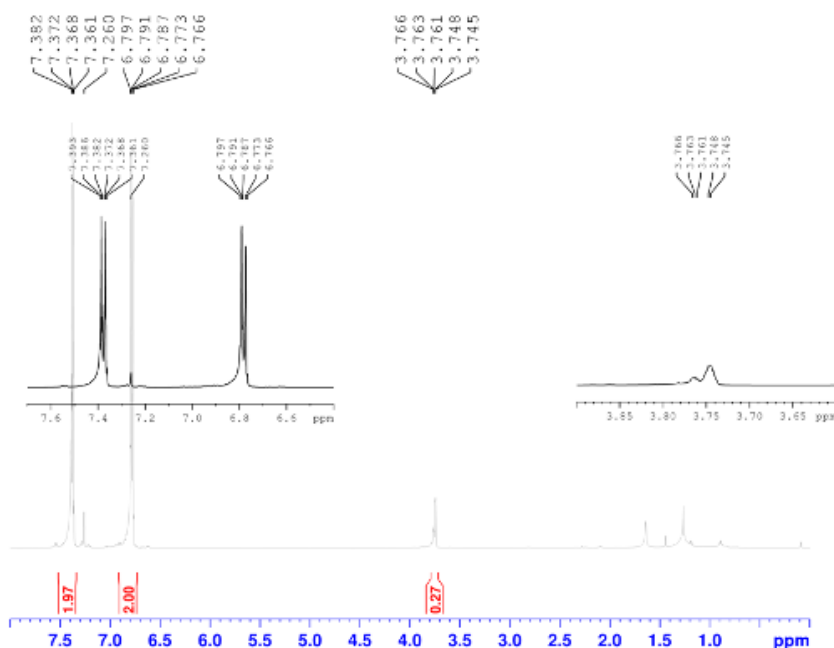

Current Data Parameters  
NAME yk01007-ky1-4045-4-1  
EXPNO 1  
PROCNO 1

F2 - Acquisition Parameters  
Date\_ 20191007  
Time 21.04  
INSTRUM spect  
PROBHD 5 mm PABBO BBO  
PULPROG zg30  
ID 32768  
SOLVENT CDCl3  
NS 8  
DS 0  
SWH 10330.578 Hz  
FIDRES 0.315264 Hz  
AQ 1.5859712 sec  
RG 101.6  
EN 48.400 usec  
DE 6.00 usec  
TE 296.7 K  
D1 1.00000000 sec  
TD0 1

===== CHANNEL f1 =====  
NUC1 <sup>1</sup>H  
P1 10.50 usec  
PL1 0.25 dB  
SFO1 500.1330855 MHz

F2 - Processing parameters  
SI 16384  
SF 500.1330132 MHz  
WDW EM  
SSB 0  
LB 0.50 Hz  
GB 0  
PC 1.00

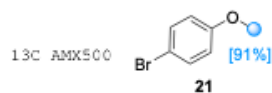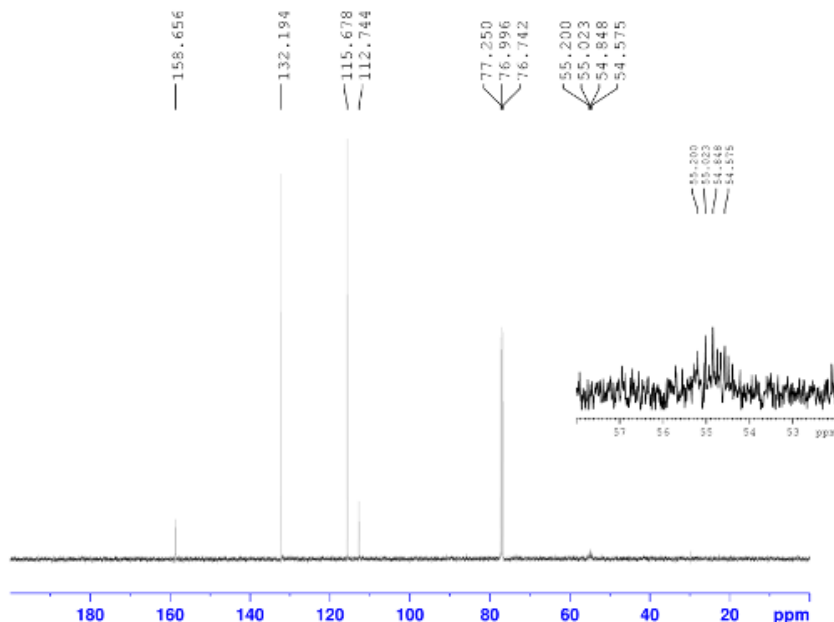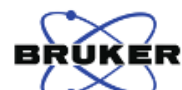

Current Data Parameters  
NAME yk01007-ky1-4045-4-1  
EXPNO 2  
PROCNO 1

F2 - Acquisition Parameters  
Date\_ 20191007  
Time 21.05  
INSTRUM spect  
PROBHD 5 mm PABBO BBO  
PULPROG zgpg30  
ID 65536  
SOLVENT CDCl3  
NS 169  
DS 0  
SWH 30030.029 Hz  
FIDRES 0.458222 Hz  
AQ 1.0911745 sec  
RG 16354  
EN 16.650 usec  
DE 6.00 usec  
TE 296.8 K  
D1 2.00000000 sec  
d11 0.03000000 sec  
DELTA 1.89999998 sec  
TD0 20

===== CHANNEL f1 =====  
NUC1 <sup>13</sup>C  
P1 8.90 usec  
PL1 0 dB  
SFO1 125.7709936 MHz

===== CHANNEL f2 =====  
CPDPRG2 waltz16  
NUC2 <sup>1</sup>H  
PCPD2 80.00 usec  
PL2 0.25 dB  
PL12 17.89 dB  
PL13 15.83 dB  
SFO2 500.1320005 MHz

F2 - Processing parameters  
SI 32768  
SF 125.7577456 MHz  
WDW EM  
SSB 0  
LB 1.00 Hz  
GB 0  
PC 1.40

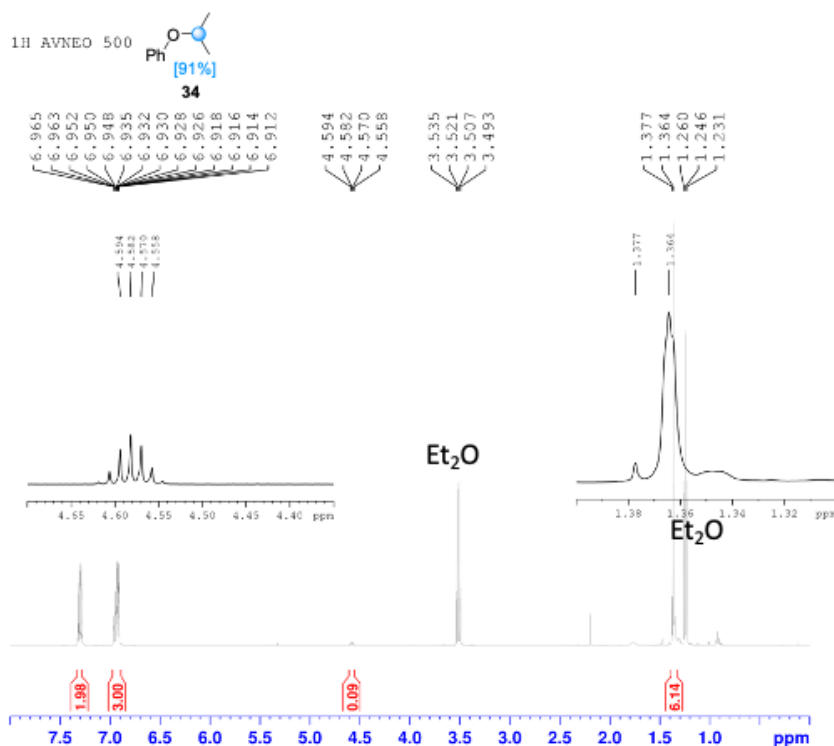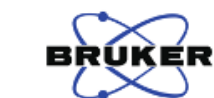

Current Data Parameters  
NAME yk0229=kyl-4139-2  
EXPNO 1  
PROCNO 1

F2 - Acquisition Parameters  
Date\_ 20200229  
Time 10.32 h  
INSTRUM Avance  
PROBHD 2169738.0003 (4  
PULPROG zg30  
TD 65536  
SOLVENT CDCl<sub>3</sub>  
NS 8  
DS 2  
SWH 10000.000 Hz  
FIDRES 0.305176 Hz  
AQ 3.276799 sec  
RG 101  
DM 50.000 usec  
DE 11.14 usec  
TE 298.0 K  
D1 1.0000000 sec  
TD0 1  
SFO1 500.1330883 MHz  
NUC1 1H  
FO 2.67 usec  
F1 8.00 usec  
PLW1 24.45703073 W

F2 - Processing parameters  
SI 65536  
SF 500.1330000 MHz  
WDW EM  
SSB 0  
LB 0.30 Hz  
GB 0  
PC 1.00

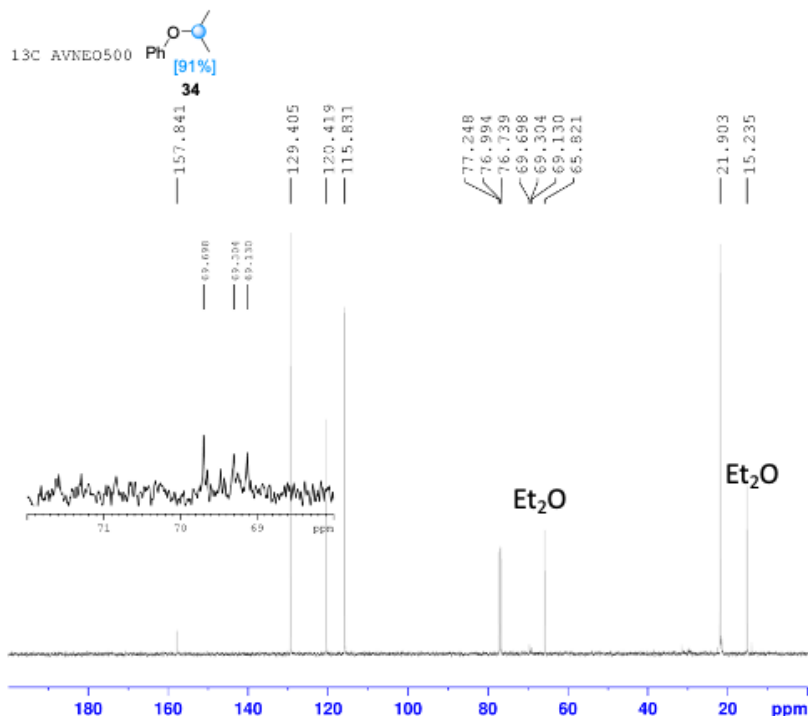

Current Data Parameters  
NAME yk0229=kyl-4139-2  
EXPNO 2  
PROCNO 1

F2 - Acquisition Parameters  
Date\_ 20200229  
Time 10.40 h  
INSTRUM Avance  
PROBHD 2169738.0003 (4  
PULPROG zgpg3  
TD 65536  
SOLVENT CDCl<sub>3</sub>  
NS 144  
DS 2  
SWH 30120.482 Hz  
FIDRES 0.318204 Hz  
AQ 1.0078977 sec  
RG 101  
DM 16.600 usec  
DE 6.72 usec  
TE 298.2 K  
D1 2.0000000 sec  
D11 0.0300000 sec  
TD0 1  
SFO1 125.7609331 MHz  
NUC1 13C  
F1 9.00 usec  
PLW1 110.78999564 W  
SFO2 500.1320005 MHz  
NUC2 1H  
CPDPRG12 waltz164  
PCPD2 80.00 usec  
PLW2 24.45703073 W  
PLW2.2 0.24457000 W  
PLW2.3 0.12302000 W

F2 - Processing parameters  
SI 65536  
SF 125.7577353 MHz  
WDW EM  
SSB 0  
LB 2.00 Hz  
GB 0  
PC 1.40

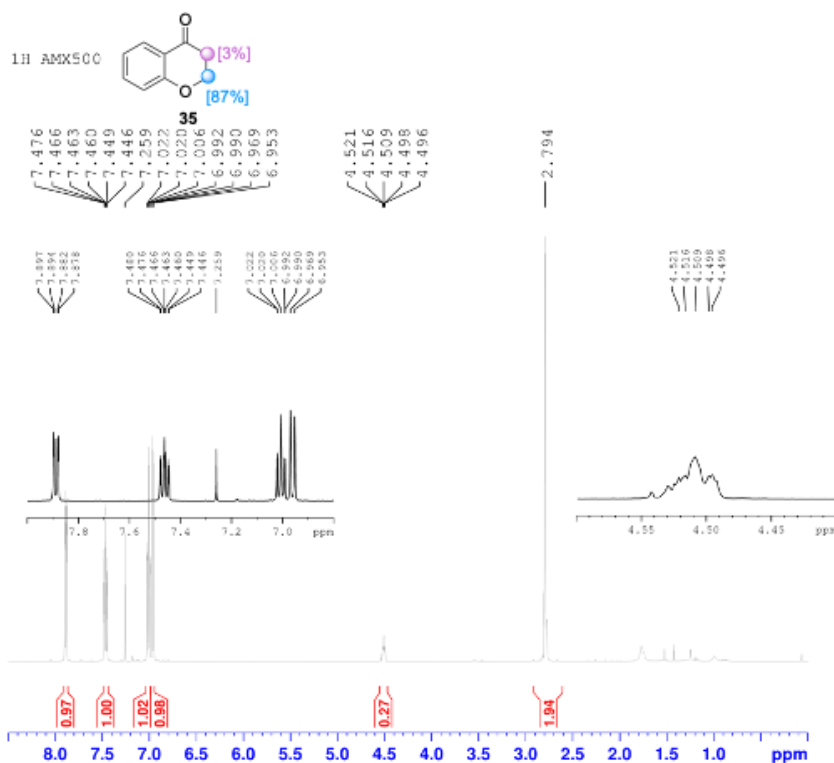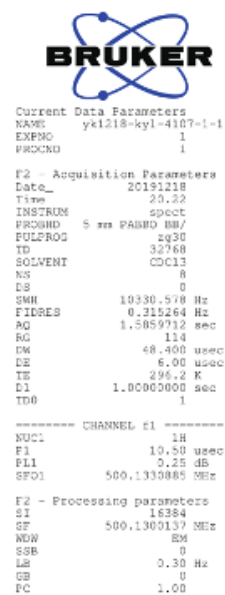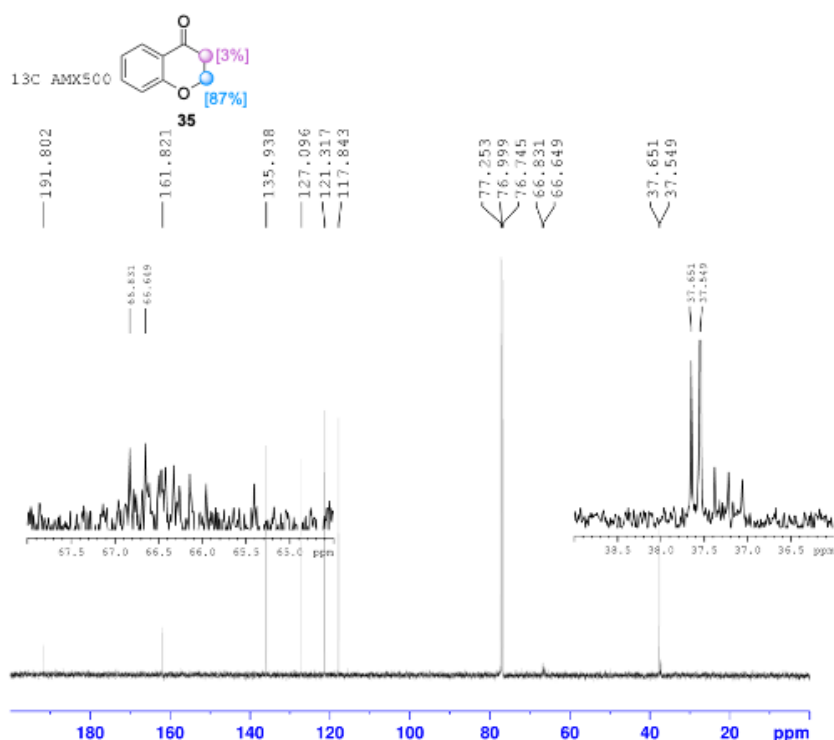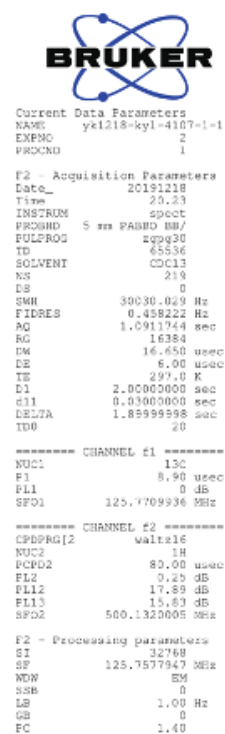

2H AV 500 NEO 23 May 2016 D NMR in CHCl3

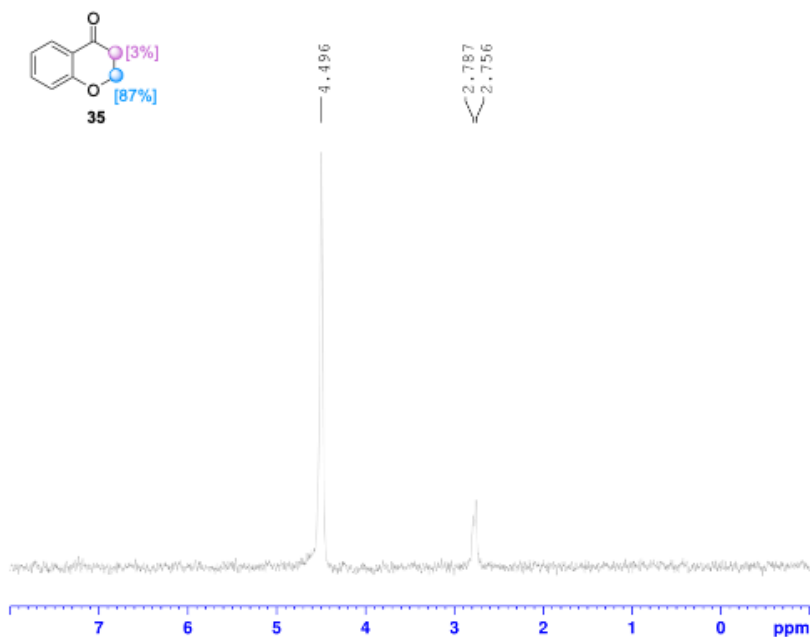

Current Data Parameters  
NAME: thd-14  
EXPNO: 2  
PROCNO: 1

F2 - Acquisition Parameters  
Date\_: 20200624  
Time: 16.38 h  
INSTRUM: CAB AV4 500 MHz BASIC  
PROBHD: z144569\_0005 (4  
PULPROG: zgpg30  
TD: 65536  
SOLVENT: CDCl3  
NS: 8  
DS: 2  
SWH: 1562.500 Hz  
FIDRES: 0.381470 Hz  
AQ: 2.6214399 sec  
RG: 12.5  
RW: 320.000 usec  
DE: 6.50 usec  
TE: 298.0 K  
D1: 1.00000000 sec  
d11: 0.03000000 sec  
TD0: 1  
SFO1: 76.7885582 MHz  
NUC1: 2H  
P1: 349.30 usec  
PL1: 3.5000000 M

F2 - Processing parameters  
SI: 65536  
SF: 76.7885510 MHz  
RG: 8  
SSB: 0  
LB: 0.30 Hz  
GB: 0  
PC: 1.00

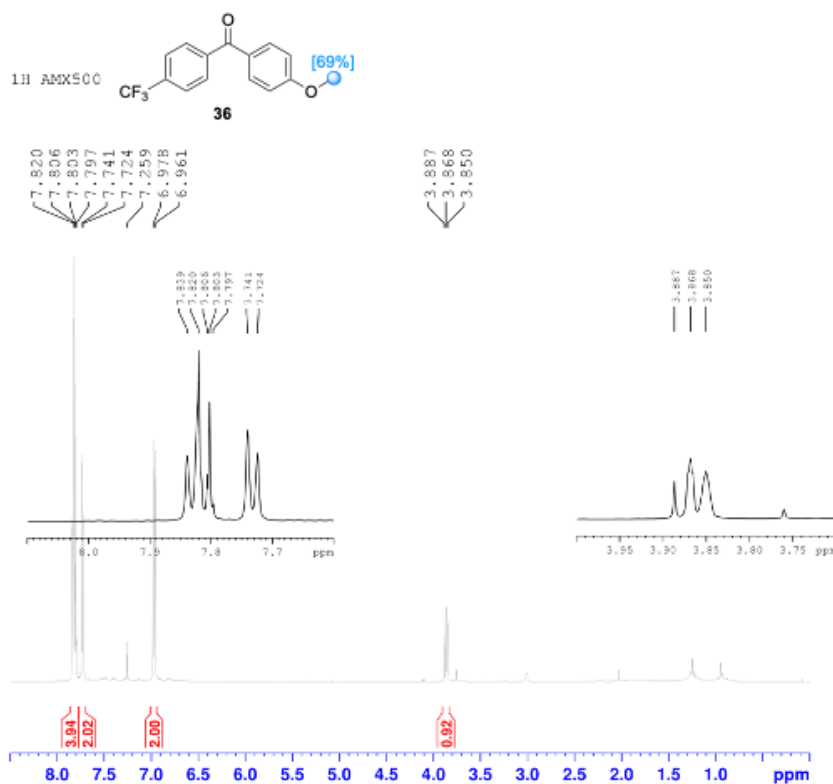

Current Data Parameters  
NAME: yx1120=kyl-4082-2-1  
EXPNO: 1  
PROCNO: 1

F2 - Acquisition Parameters  
Date\_: 20191120  
Time: 19.10  
INSTRUM: spect  
PROBHD: 5 mm PABBO BB/  
PULPROG: zgpg30  
TD: 32768  
SOLVENT: CDCl3  
NS: 8  
DS: 0  
SWH: 10330.570 Hz  
FIDRES: 0.215264 Hz  
AQ: 1.5859712 sec  
RG: 57  
RW: 48.400 usec  
DE: 6.00 usec  
TE: 296.0 K  
D1: 1.00000000 sec  
TD0: 1

----- CHANNEL f1 -----  
NUC1: 1H  
P1: 10.50 usec  
PL1: 0.25 dB  
SFO1: 500.1330885 MHz

F2 - Processing parameters  
SI: 16384  
SF: 500.1300137 MHz  
RG: 655  
SSB: 0  
LB: 0.30 Hz  
GB: 0  
PC: 1.00

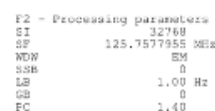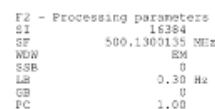

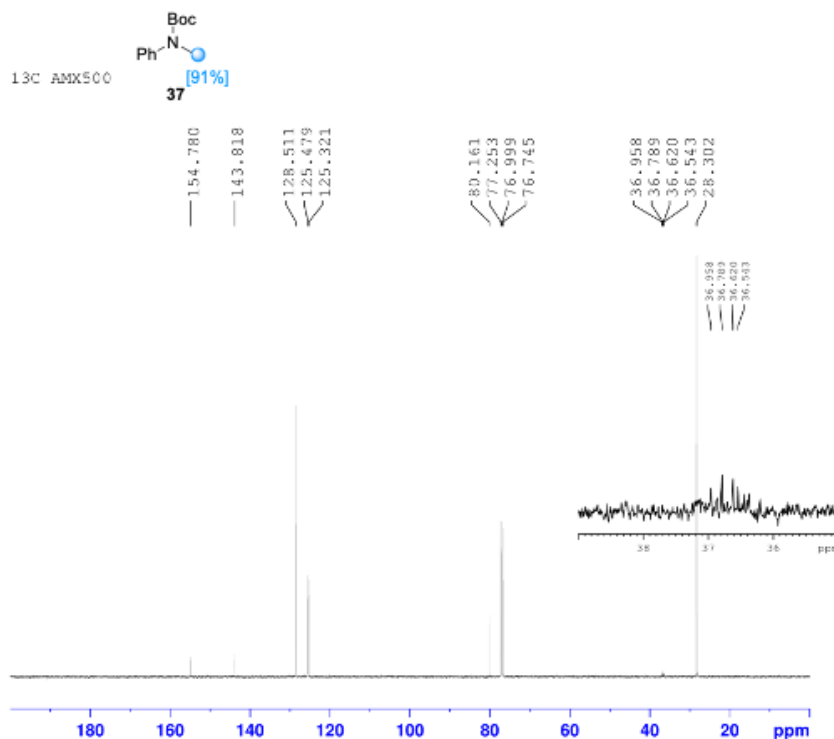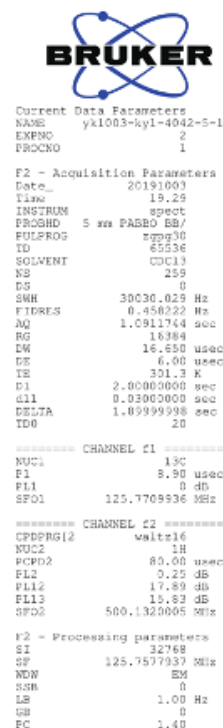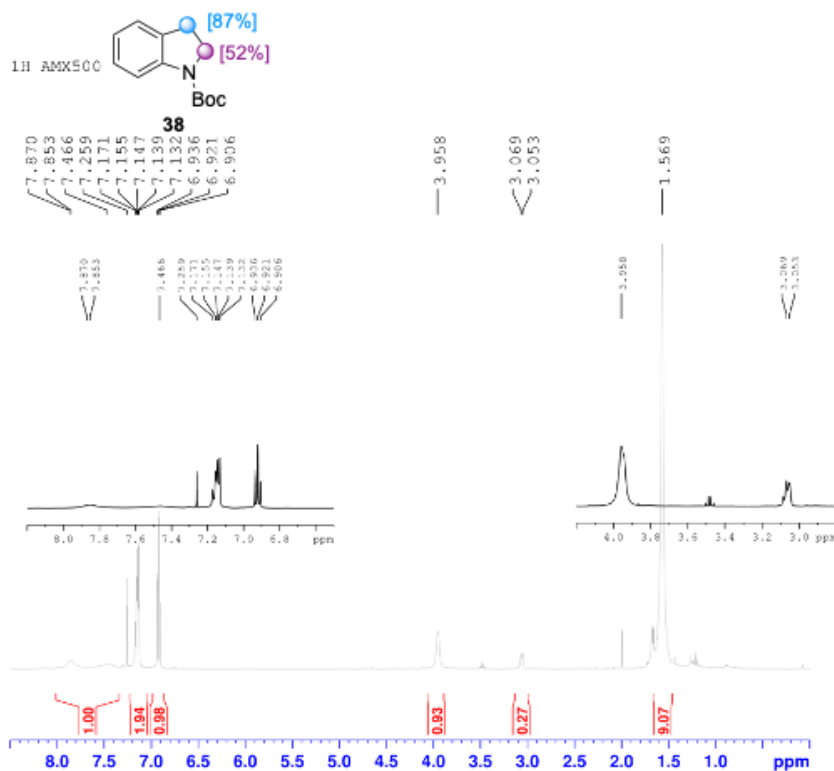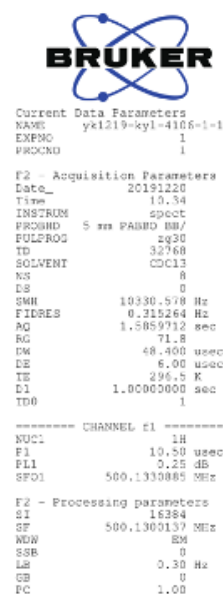

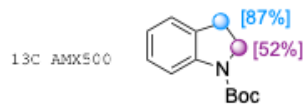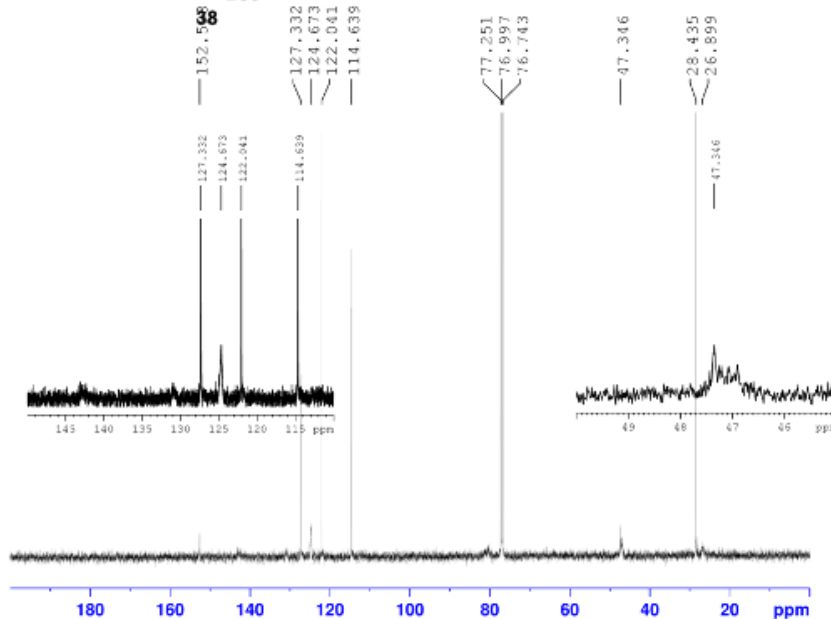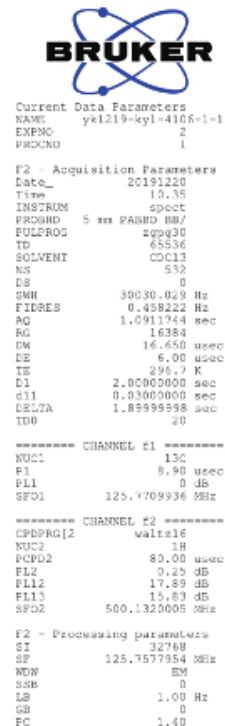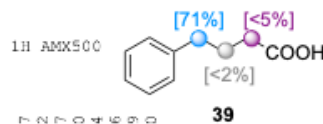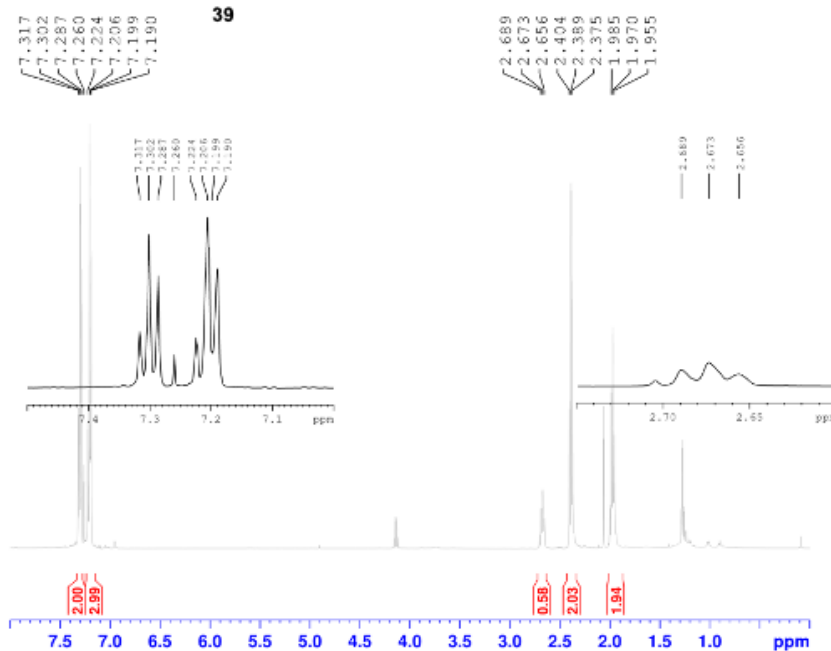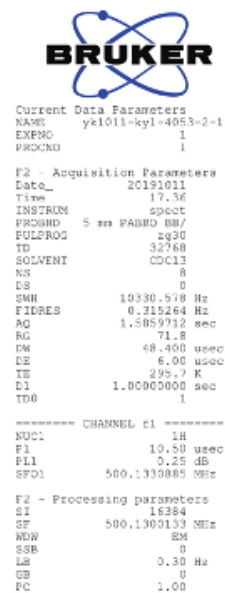

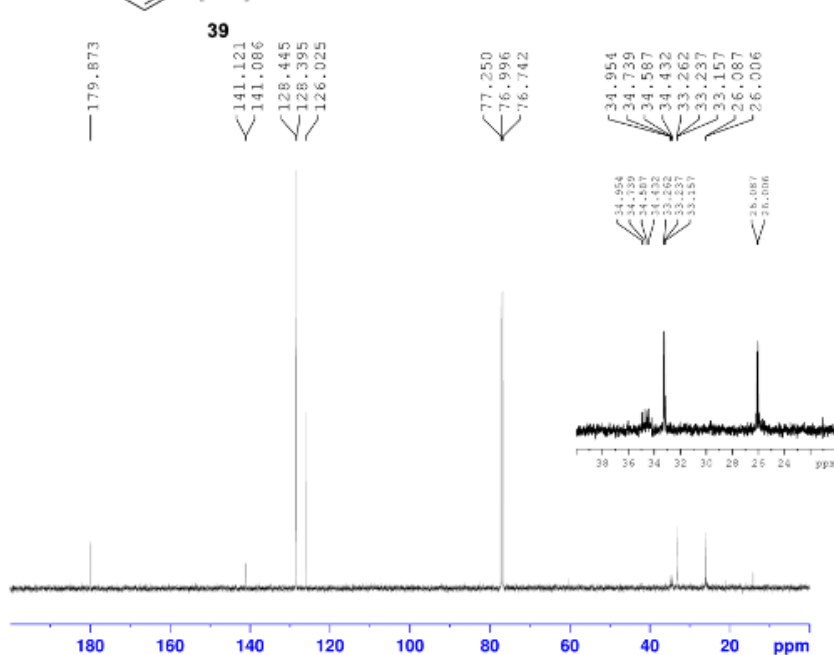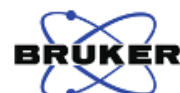

```
Current Data Parameters
NAME      yk1011-ky1-4053-2-1
EXPNO     4
PROCNO    1
```

```

F2 Acquisition Parameters
Date_      20191011
Time       20.51
INSTRUM    spect
PROCNO     5 run PARAMB.B/
PULPROG    zgpg30
TD          65536
SOLVENT    CDCl3
NS          101
DS          0
SWH         30030.029 Hz
FIDRES     0.458222 Hz
AQ         1.6911744 sec
RG         16384
FW         16.650 usec
DE         6.00 usec
TE          297.0 K
D1          2.00000000 sec
c11         0.03000000 sec
DELTA      1.85995998 sec
ID0         20

```

```

===== CHANNEL f1 =====
NUC1      13C
F1         8.90 usec
FL1        0 dB
SFO1      125.7709936 MHz

```

```
***** CHANNEL #2 *****
CPDRPG[2]          waltz16
KUC2               1H
PCPD2              80.00  usec
FL2                0.25  dB
FL12               17.89  dB
FL13               15.83  dB
SPD2               500.1320005 MHz
```

|                            |                 |
|----------------------------|-----------------|
| F2 - Processing parameters |                 |
| SI                         | 32768           |
| SF                         | 125.7577955 MHz |
| NDW                        | EM              |
| SSB                        | 0               |
| LB                         | 1.00 Hz         |
| GB                         | 0               |
| EC                         | 1.40            |

2H AV 500 NEO 23 May 2017 D NMR in CHCl3

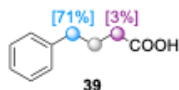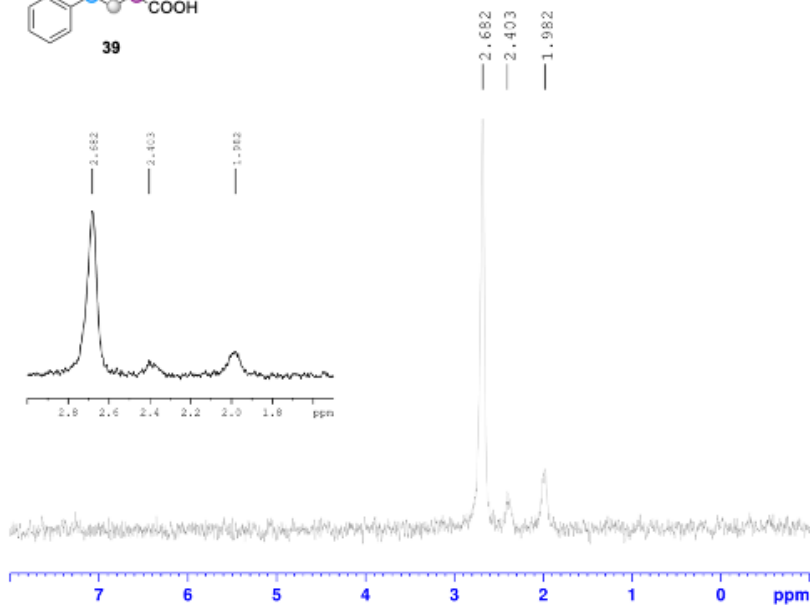

```
Current Data Parameters
NAME                thd-15
EXPNO               2
PROCNO              1
```

```

F2 - Acquisition Parameters
Date:      20200624
Time:      15:40 H
INSTRUM    CAR AV4 500MHz NMR
PROBHD      ZI44569-0005
PULPROG     zgpg30
TD          8192
FIDRES      0.000133
SOLVENT     CDCl3
NS           8
DS           2
SWH          1562.560 Hz
AQ           0.581470 Hs
F2 - F1      2.621459 MHz
RG           12.5
ENF          320.000000
TE           29.50
NUC1         299.0 K
C1           1.00000000
C2           0.03000000
TD0          1
SFOF         76.7885882 MHz
NUC2         131
P1           349.30
PLAN        3.50000000 W

```

```
F2 = Processing parameters
SI          65536
SF          76.7883469 MHz
KCN         824
SSB         0
LB          0.30 Hz
GB          0
PC          1.00
```

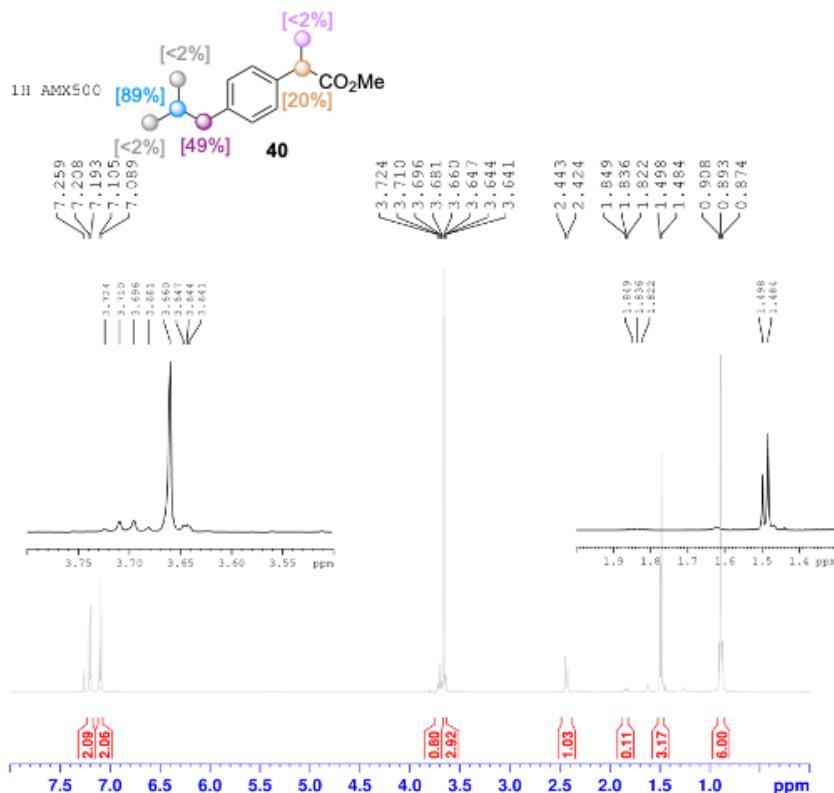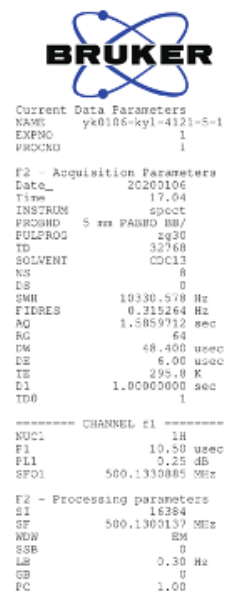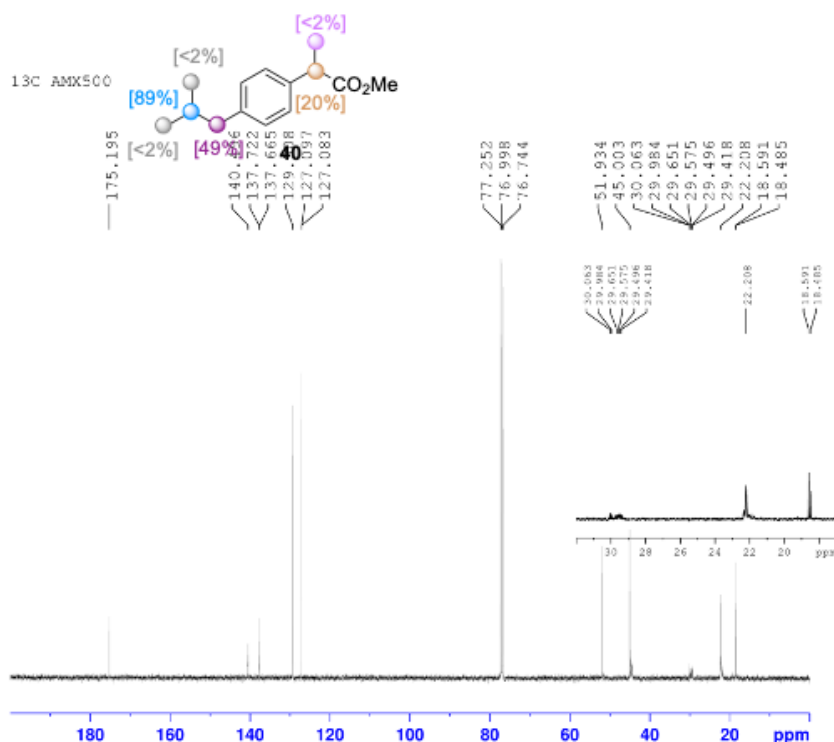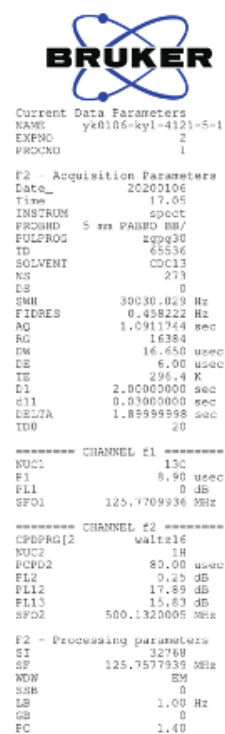

2H AV 500 NEO 23 May 2017 D NMR in CHCl3

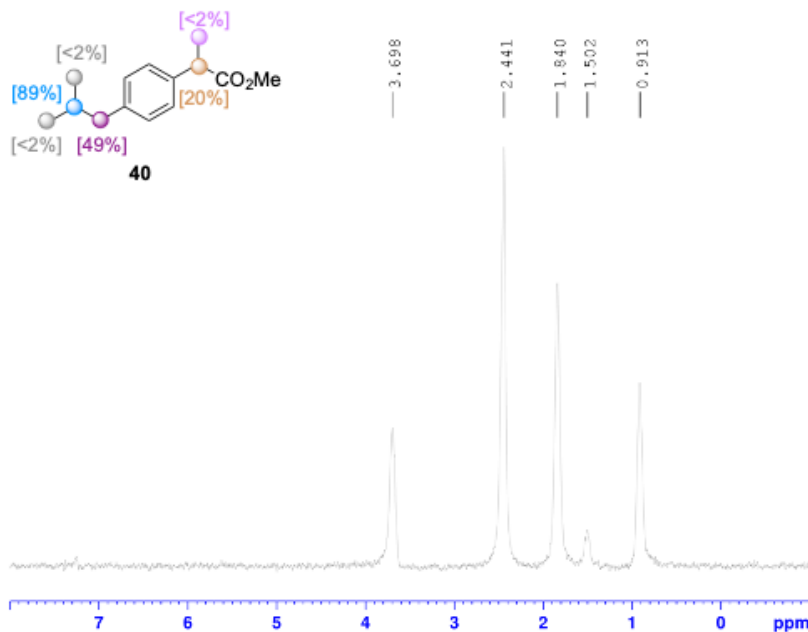

Current Data Parameters  
NAME thd-16  
EXPNO 2  
PROCNO 1

F2 - Acquisition Parameters  
Date\_ 20200623  
Time 15.16 h  
INSTRUM CPM AV4 500 MHz BASIC  
PROBHD Z144369\_0005 (4  
PULPROG zgpg30  
TD 65536  
SOLVENT DMSO  
NS 16  
DS 2  
SWH 1562.500 Hz  
FIDRES 0.381470 Hz  
AQ 2.6214399 sec  
RG 13.8589  
RW 320.200 usec  
DE 6.50 usec  
TE 298.0 K  
D1 1.00000000 sec  
d11 0.03000000 sec  
TD0 1  
SFO1 76.788582 MHz  
NUC1 2H  
P1 349.30 usec  
PL1 3.50000000 W

F2 - Processing parameters  
SI 65536  
SF 76.788582 MHz  
RG 8  
SSB 0  
LB 0.30 Hz  
GB 0  
PC 1.00

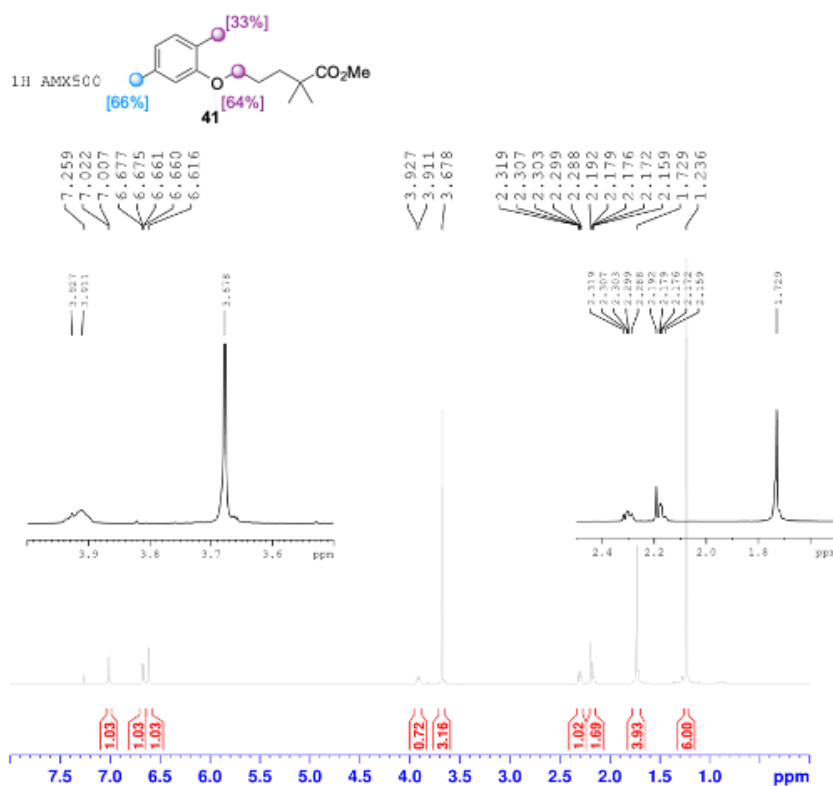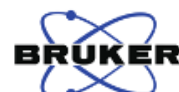

Current Data Parameters  
NAME yx0220=kyl-4059-2  
EXPNO 1  
PROCNO 1

F2 - Acquisition Parameters  
Date\_ 20200220  
Time 16.35  
INSTRUM spect  
PROBHD 5 mm PABBO BB/  
PULPROG zg30  
TD 32768  
SOLVENT CDCl3  
NS 8  
DS 0  
SWH 10330.570 Hz  
FIDRES 0.215264 Hz  
AQ 1.5859712 sec  
RG 45.3  
RW 48.400 usec  
DE 6.00 usec  
TE 296.1 K  
D1 1.00000000 sec  
TD0 1

===== CHANNEL f1 =====  
NUC1 1H  
P1 10.50 usec  
PL1 0.25 dB  
SFO1 500.1330885 MHz

F2 - Processing parameters  
SI 16384  
SF 500.1300137 MHz  
RG 8  
SSB 0  
LB 0.30 Hz  
GB 0  
PC 1.00

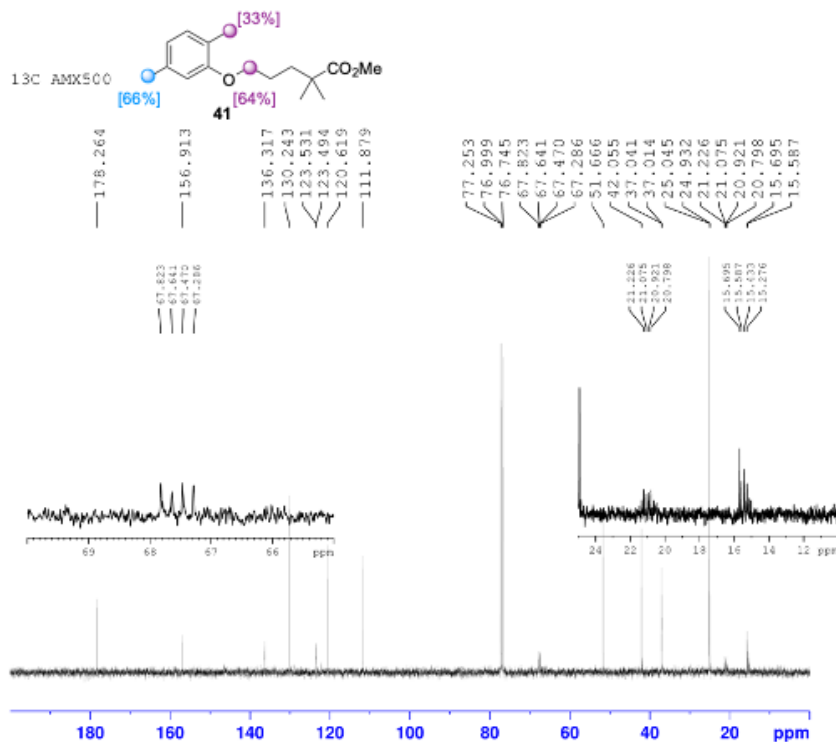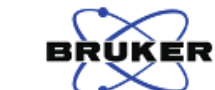

Current Data Parameters  
NAME yk0220-ky1-4059-2  
EXPNO 2  
PROCNO 1

F2 - Acquisition Parameters  
Date\_ 20200220  
Time 16.36  
INSTRUM spect  
PROBHD 5 mm PABBO BB/  
PULPROG zgpg30  
TD 65536  
SOLVENT CDCl3  
NS 72  
DS 0  
SMB 30030.029 Hz  
FIDRES 0.458222 Hz  
AQ 1.0911744 sec  
RG 16384  
TM 16.450 usec  
DE 6.00 usec  
TE 296.2 K  
D1 2.0000000 sec  
C11 0.0300000 sec  
DELTA 1.8599598 sec  
TD0 20

===== CHANNEL f1 =====  
NUC1 13C  
P1 8.90 usec  
PL1 0 dB  
SFO1 125.770936 MHz

===== CHANNEL f2 =====  
CPDPRG2 waltz16  
NUC2 1H  
PCPD2 80.00 usec  
PL2 0.25 dB  
PL12 17.89 dB  
PL13 15.83 dB  
SFO2 500.1320005 MHz

F2 - Processing parameters  
SI 32768  
SF 125.7577975 MHz  
WDW EM  
SSB 0  
LB 1.00 Hz  
GB 0  
PC 1.40

2H AV 500 NEO 23 May 2017 D NMR in CHCl3

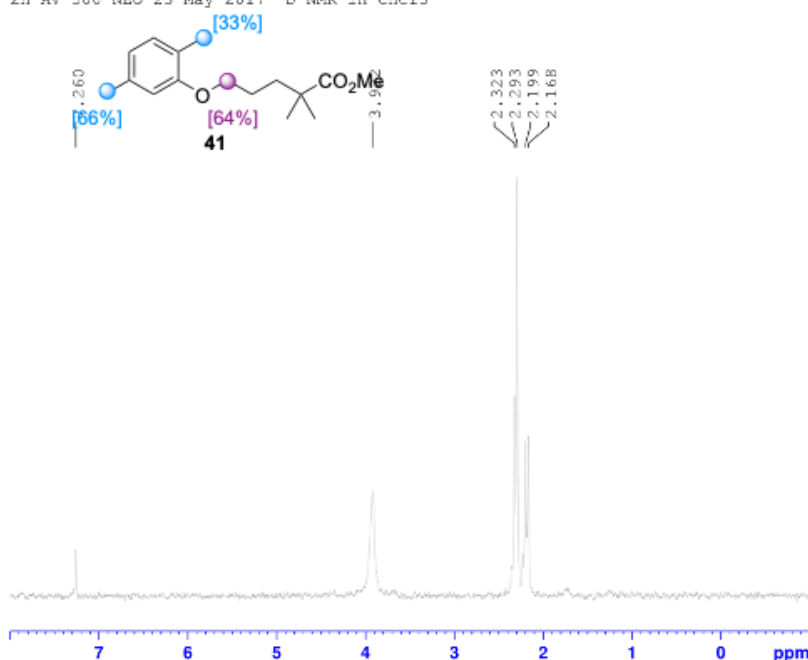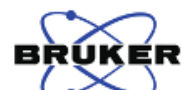

Current Data Parameters  
NAME tld-17  
EXPNO 2  
PROCNO 1

F2 - Acquisition Parameters  
Date\_ 20200624  
Time 16.42 h  
INSTRUM CBB AV4 500 MHz BASIC  
PROBHD z144569\_0005 /  
PULPROG zg2h.2  
TD 8192  
SOLVENT CDCl3  
NS 8  
DS 2  
SMB 1562.500 Hz  
FIDRES 0.381470 Hz  
AQ 2.6214399 sec  
RG 12.5  
EN 320.000 usec  
TE 6.50 usec  
TE 298.0 K  
D1 1.0000000 sec  
C11 0.0300000 sec  
TD0 1  
SFO1 76.7885582 MHz  
NUC1 2H  
P1 349.30 usec  
PL1 3.5000000 W

F2 - Processing parameters  
SI 65536  
SF 76.7883480 MHz  
WDW RM  
SSB 0  
LB 0.30 Hz  
GB 0  
PC 1.00

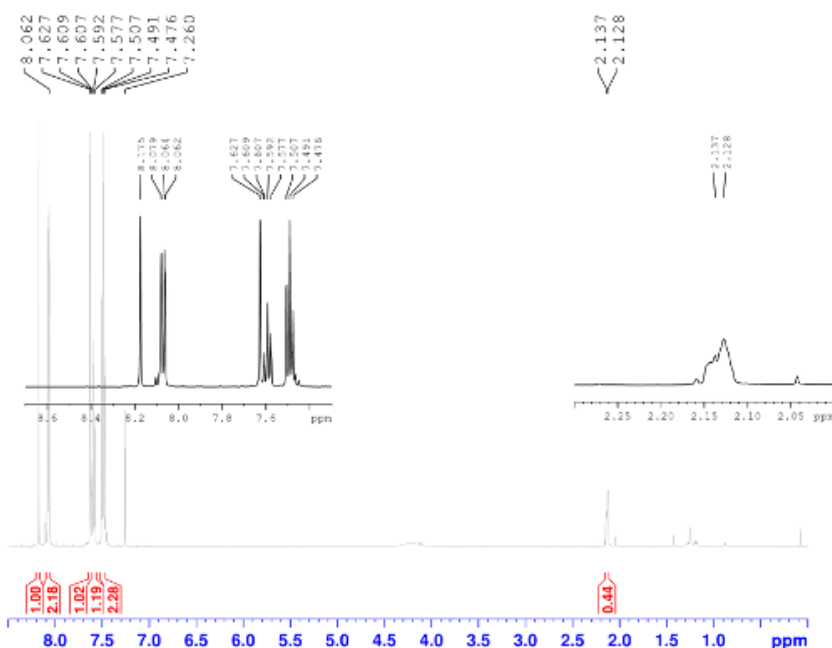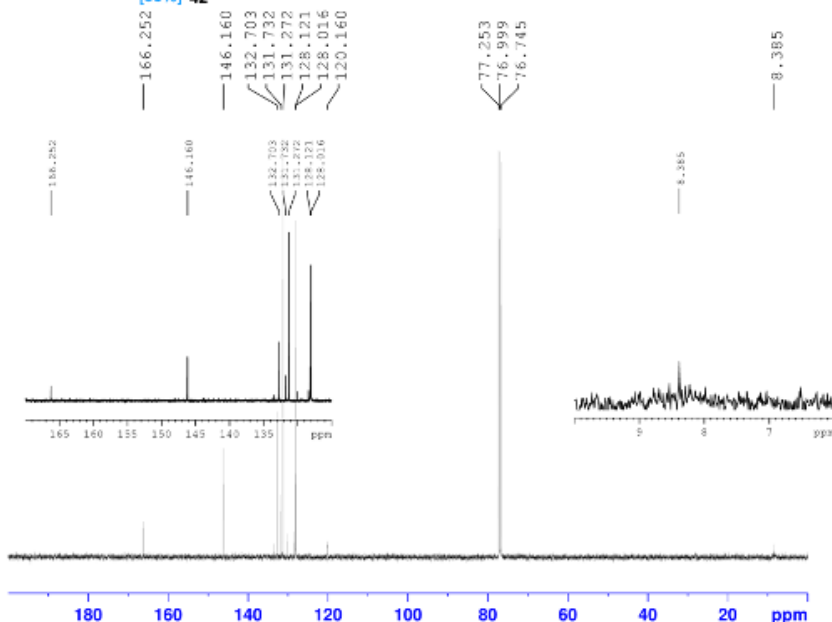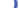

```
Current Data Parameters
NAME      yk0106-ky1-4112-2-1
EXPNO     1
PROCNO    1
```

```

F2 - Acquisition Parameters
Date_      20200106
Time       16.40
INSTRUM    spect
PROBHD     5 mm PABBO
PULPROG    zgpg
TD          32768
SOLVENT    CDCl3
NS          8
DS          0
SWH         10330.578  Hz
FIDRES      0.315264  Hz
AQ          1.5859712  sec
RG          128
CW          48.450  usec
TE          6.00  usec
DE          295.9  K
E1          1.0000000  sec
T1          1
TD0         1

```

```

===== CHANNEL f1 =====
NUC1              1H
F1                10.50 usec
FL1               0.25 dB
SFO1              500.130085 MHz

F2 - Processing parameters
SI                16384
SF               500.1300136 MHz
NDW              RM
SSB              0
LB              0.30 Hz
GB              U
PC              1.00

```

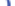

```
Current Data Parameters
NAME      yk0106-kyl-4112-2-1
EXPNO     2
PROCNO    1
```

```

F2 Acquisition Parameters
Date_          2C202106
Time           16.41
INSTRUM        spect
PROBHD         5 mm PABBO BB/
PULPROG        zgpg30
TD              65536
SOLVENT         CDCl3
NS              227
DS              0
SWH             300.30.029 Hz
FIDRES         0.458222
AQ             1.6911744 sec
RG             1.6284
PM             16.650 usec
DE             6.00 usec
TE             296.0 K
D1             2.0000000 sec
DELTA          0.8300000 sec
c11            1.8399999 sec
CBLZ           2.00
CBZ2           2.00

```

```

===== CHANNEL f1 =====
NUG1                13C
F1                  8.90  used
FL1                  0  dB
SFO1                125.7709936 MHz

===== CHANNEL f2 =====
CPDPRG[2]           wait:16
NUG2                1H
PCPD2              83.00  used
FL2                 0.25  dB
FL12                17.89  dB
FL13                15.83  dB
SFO2                500.1320005 MHz

```

|                            |                 |
|----------------------------|-----------------|
| F2 - Processing parameters |                 |
| SI                         | 32768           |
| SP                         | 125.7577948 MHz |
| NDW                        | EM              |
| SSB                        | 0               |
| LB                         | 1.00 Hz         |
| GB                         | 0               |
| FC                         | 1.40            |

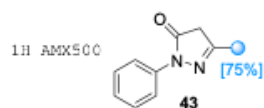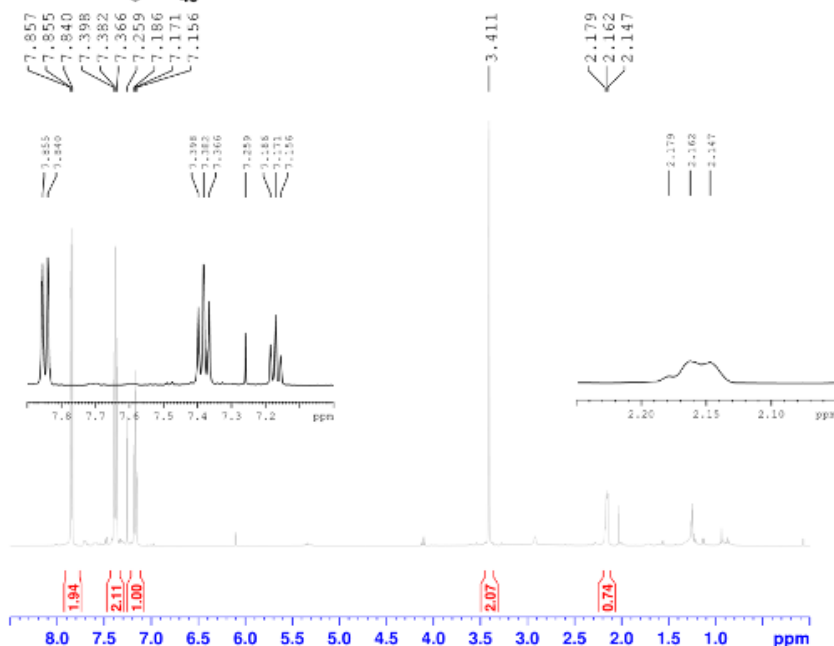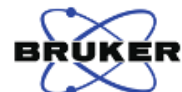

Current Data Parameters  
NAME yx1130-kyl-4087-4-1  
EXPNO 1  
PROCNO 1

F2 - Acquisition Parameters  
Date\_ 20191130  
Time 16.24  
INSTRUM spect  
PROBHD 5 mm PABBO BB/  
PULPROG zgpg30  
TD 32768  
SOLVENT CDCl3  
NS 8  
DS 0  
SMH 10330.578 Hz  
FIDRES 0.315264 Hz  
AQ 1.5859712 sec  
RG 50.5  
DM 68.400 usec  
DE 6.00 usec  
TE 296.1 K  
D1 1.00000000 sec  
TD0 1

===== CHANNEL f1 =====  
NUC1 <sup>1</sup>H  
P1 10.50 usec  
PL1 0.25 dB  
SFO1 500.1330085 MHz

F2 - Processing parameters  
SI 16384  
SF 500.1300133 MHz  
WDW EM  
SSB 0  
LB 0.30 Hz  
GB 0  
PC 1.00

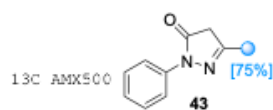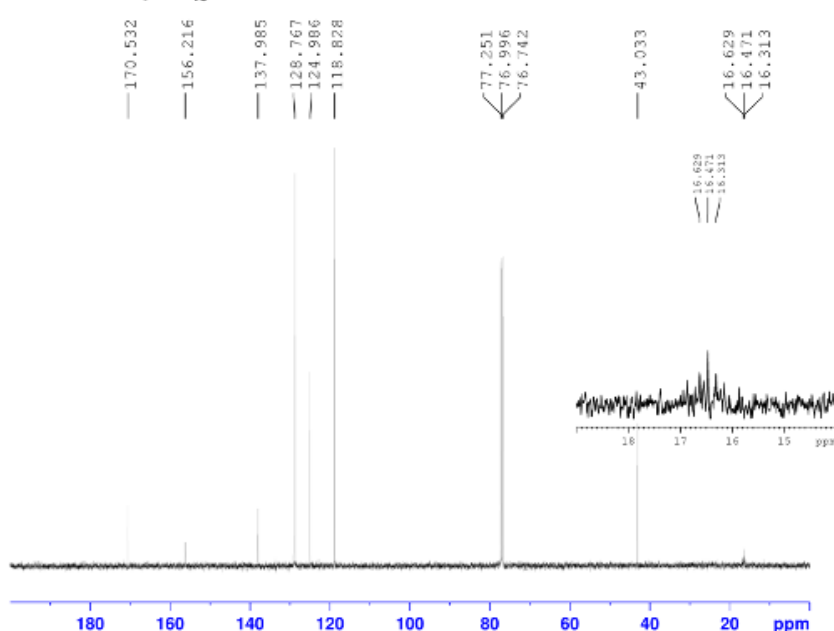

Current Data Parameters  
NAME yx1130-kyl-4087-4-1  
EXPNO 2  
PROCNO 1

F2 - Acquisition Parameters  
Date\_ 20191130  
Time 16.25  
INSTRUM spect  
PROBHD 5 mm PABBO BB/  
PULPROG zgpg30  
TD 65536  
SOLVENT CDCl3  
NS 178  
DS 0  
SMH 30030.029 Hz  
FIDRES 0.458222 Hz  
AQ 1.0911744 sec  
RG 16384  
DM 16.650 usec  
DE 6.00 usec  
TE 296.4 K  
D1 2.00000000 sec  
d11 0.03000000 sec  
DELTA 1.85999998 sec  
TD0 20

===== CHANNEL f1 =====  
NUC1 <sup>13</sup>C  
P1 8.90 usec  
PL1 0 dB  
SFO1 125.7709936 MHz

===== CHANNEL f2 =====  
CPDPRG2 waltz16  
NUC2 <sup>1</sup>H  
PCPD2 80.00 usec  
PL2 0.25 dB  
PL12 17.89 dB  
PL13 15.83 dB  
SFO2 500.1320005 MHz

F2 - Processing parameters  
SI 32768  
SF 125.7577973 MHz  
WDW EM  
SSB 0  
LB 1.00 Hz  
GB 0  
PC 1.40

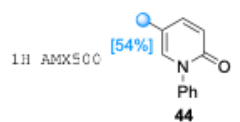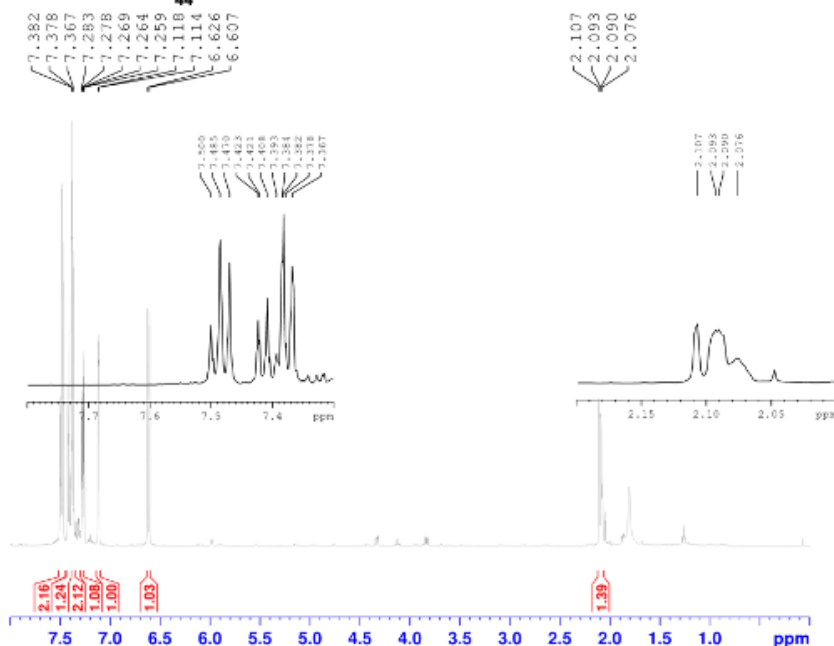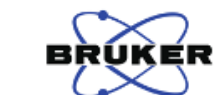

Current Data Parameters  
NAME yk1227-ky1-4115-7-1  
EXPMO 1  
PROCNO 1

F2 - Acquisition Parameters  
Date\_ 20191227  
Time 12.00  
INSTRUM spect  
PROBHD 5 mm PABBO BB/  
PULPROG zgpg30  
TD 32768  
SOLVENT CDCl3  
NS 8  
DS 0  
SMH 10130.578 Hz  
FIDRES 0.315264 Hz  
AQ 1.5859712 sec  
RG 143.7  
DM 48.400 usec  
DE 6.00 usec  
TE 295.0 K  
D1 1.00000000 sec  
TD0 1

===== CHANNEL f1 =====  
NUC1 <sup>1</sup>H  
P1 10.50 usec  
PL1 0.25 dB  
SFO1 500.1330085 MHz  
  
F2 - Processing parameters  
SI 16384  
SF 500.1300093 MHz  
WDW EM  
SSB 0  
LB 0.30 Hz  
GB 0  
PC 1.00

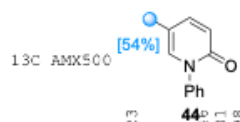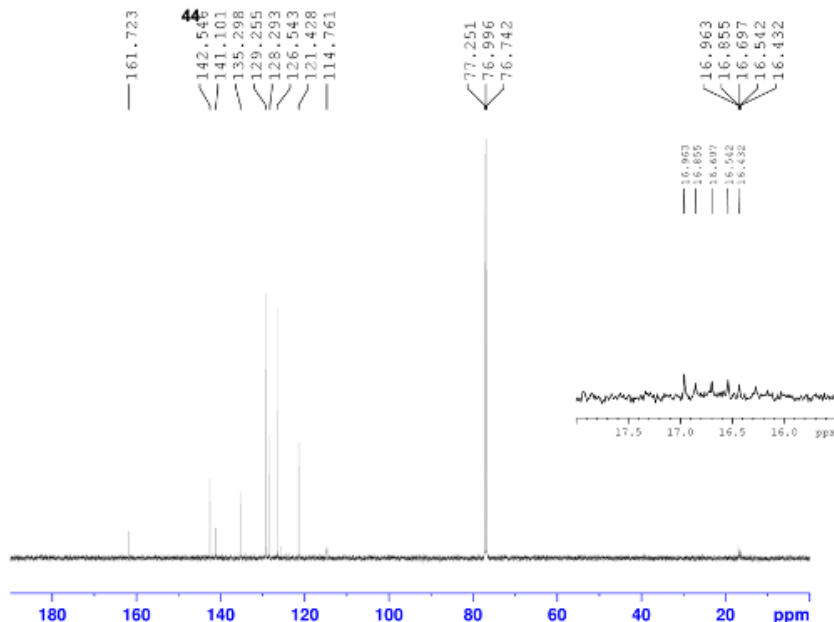

Current Data Parameters  
NAME yk1227-ky1-4115-7-1  
EXPMO 2  
PROCNO 1

F2 - Acquisition Parameters  
Date\_ 20191227  
Time 12.01  
INSTRUM spect  
PROBHD 5 mm PABBO BB/  
PULPROG zgpg30  
TD 65536  
SOLVENT CDCl3  
NS 306  
DS 0  
SMH 30030.029 Hz  
FIDRES 0.458222 Hz  
AQ 1.0911744 sec  
RG 16384  
DM 16.650 usec  
DE 6.00 usec  
TE 295.9 K  
D1 2.00000000 sec  
d11 0.03000000 sec  
DELTA 1.85999998 sec  
TD0 20

===== CHANNEL f1 =====  
NUC1 <sup>13</sup>C  
P1 8.90 usec  
PL1 0 dB  
SFO1 125.7709936 MHz  
  
===== CHANNEL f2 =====  
CPDPRG2 waltz16  
NUC2 <sup>1</sup>H  
PCPD2 80.00 usec  
PL2 0.25 dB  
PL12 17.89 dB  
PL13 15.83 dB  
SFO2 500.1320005 MHz

F2 - Processing parameters  
SI 32768  
SF 125.7577955 MHz  
WDW EM  
SSB 0  
LB 1.00 Hz  
GB 0  
PC 1.40

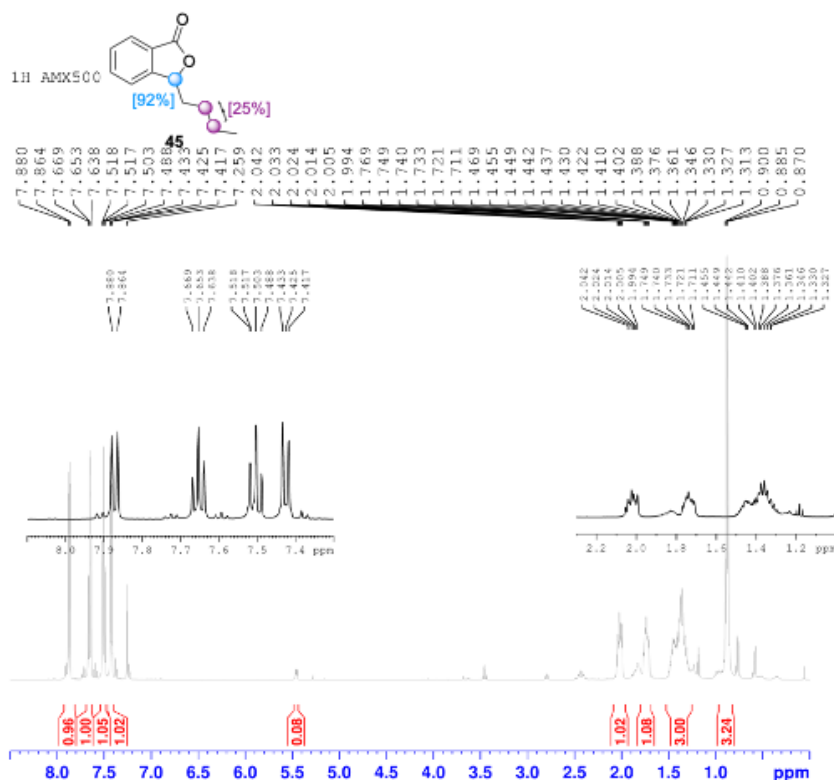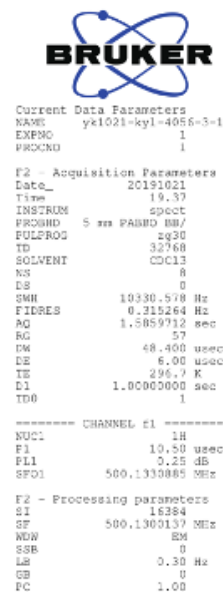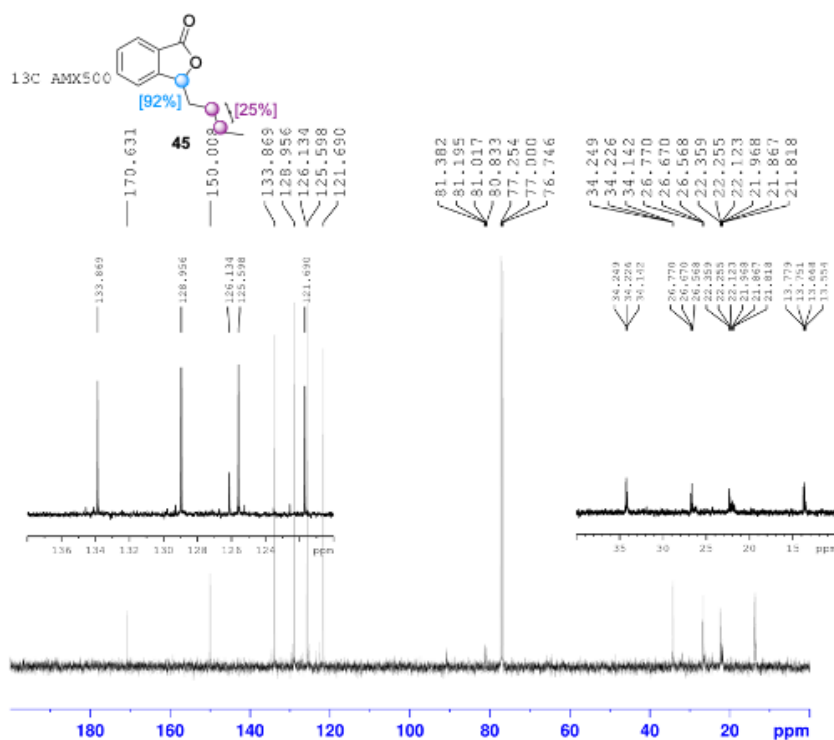

2H AV 500 NEO 23 May 2017 D NMR in CHCl3

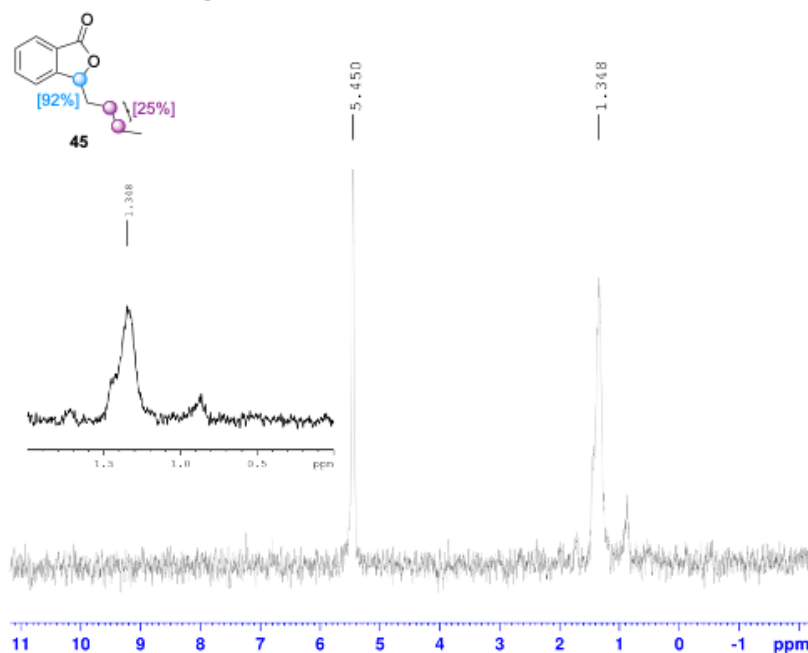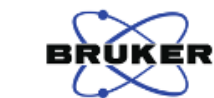

Current Data Parameters  
 NAME thd-20  
 EXPNO 2  
 PROCNO 1

F2 - Acquisition Parameters  
 Date\_ 20200624  
 Time 15:48 h  
 INSTRUM CAB AV4 500 MHS BASIC  
 PROBHD Z144369\_0005 (4  
 PULPROG zgpg30  
 TD 8192  
 SOLVENT CDCl3  
 NS 8  
 DS 2  
 SWH 1562.500 Hz  
 FIDRES 0.381470 Hz  
 AQ 2.6214399 sec  
 RG 12.5  
 DW 320.000 usec  
 DE 5.50 usec  
 TE 295.2 K  
 D1 1.00000000 sec  
 D11 0.03000000 sec  
 TDO  
 SFO1 76.7885582 MHz  
 NUC1 2H  
 P1 349.30 usec  
 PLW1 3.50000000 W

F2 - Processing parameters  
 SI 65536  
 SF 76.7883310 MHz  
 XDM 2H  
 SSB 0  
 LB 0.30 Hz  
 GB 0  
 PC 1.00

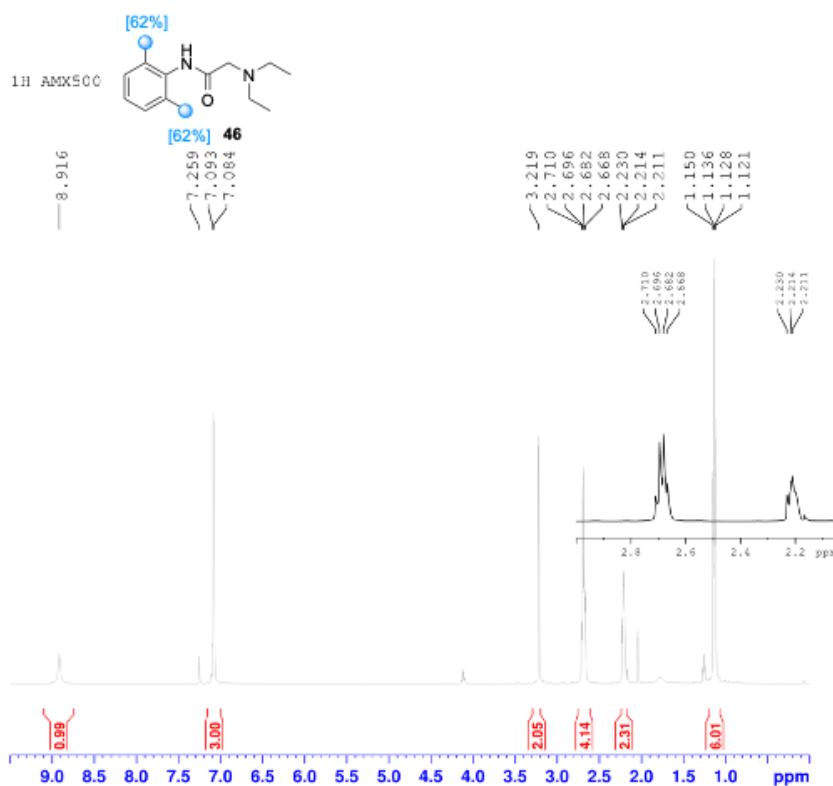

Current Data Parameters  
 NAME yxl224-kyl-4113-2-1  
 EXPNO 1  
 PROCNO 1

F2 - Acquisition Parameters  
 Date\_ 20191224  
 Time 20:14  
 INSTRUM spect  
 PROBHD 5 mm PAHD BB/  
 PULPROG zgpg30  
 TD 32768  
 SOLVENT CDCl3  
 NS 8  
 DS 0  
 SWH 10330.578 Hz  
 FIDRES 0.315264 Hz  
 AQ 1.5859712 sec  
 RG 80.6  
 DW 48.400 usec  
 DE 6.00 usec  
 TE 296.2 K  
 D1 1.00000000 sec  
 TDO 1

----- CHANNEL f1 -----  
 NUC1 1H  
 P1 10.50 usec  
 PL1 0.25 dB  
 SFO1 500.1330885 MHz

F2 - Processing parameters  
 SI 16384  
 SF 500.130159 MHz  
 XDM 1H  
 SSB 0  
 LB 0.30 Hz  
 GB 0  
 PC 1.00

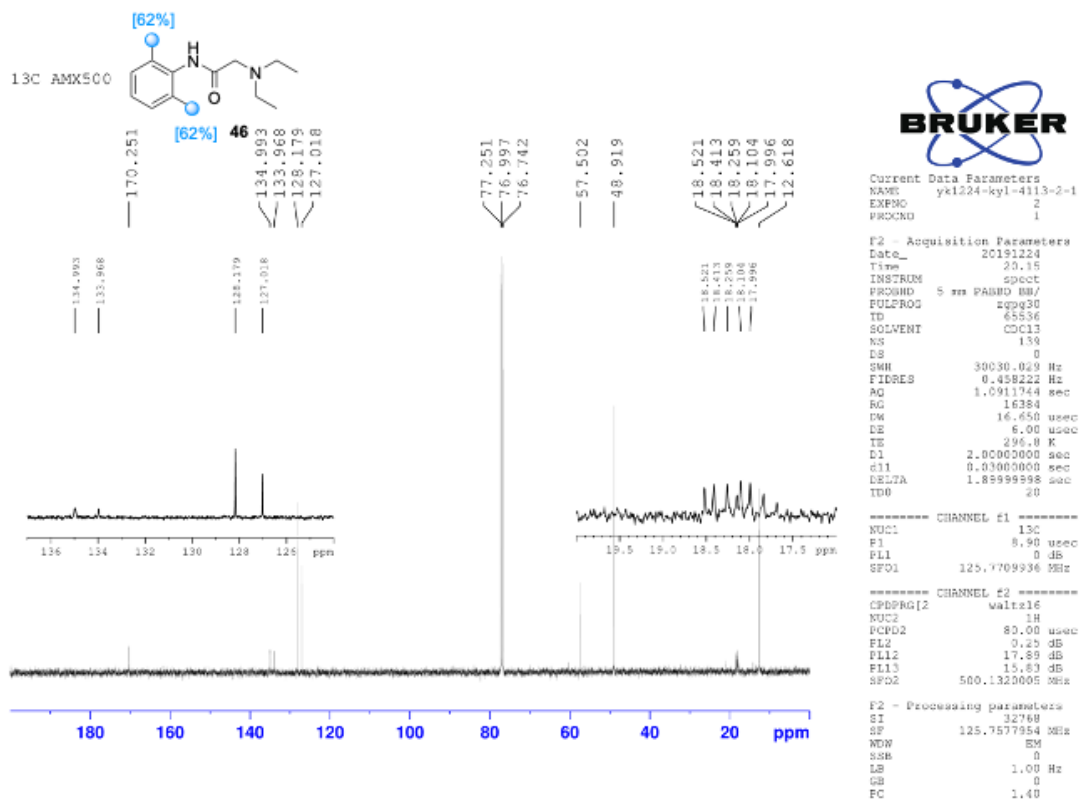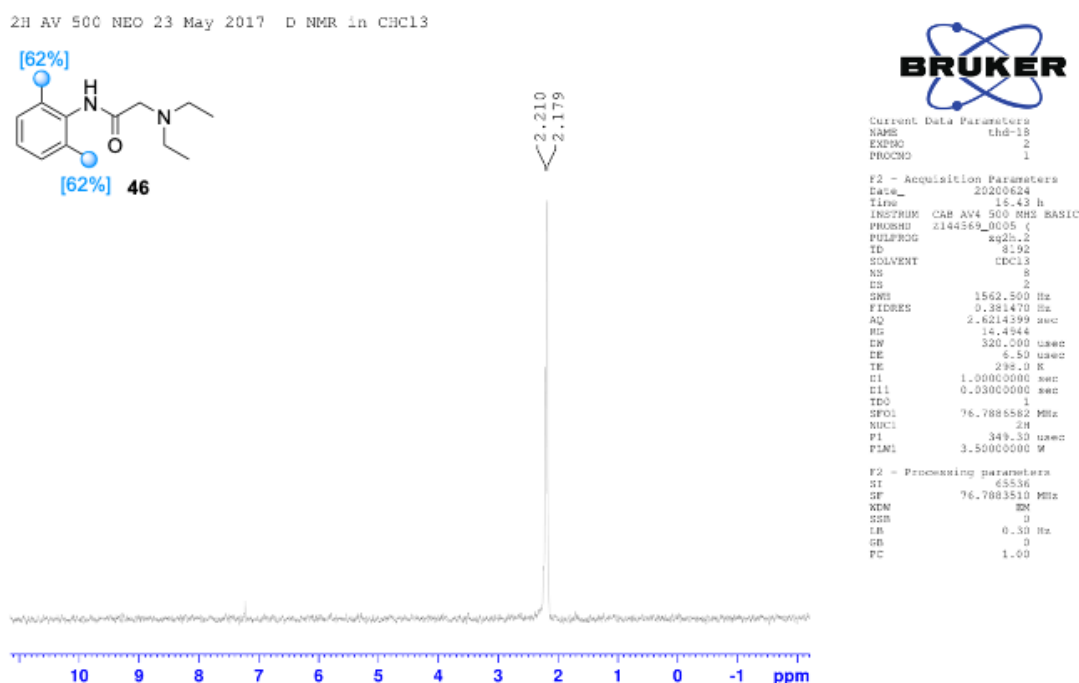

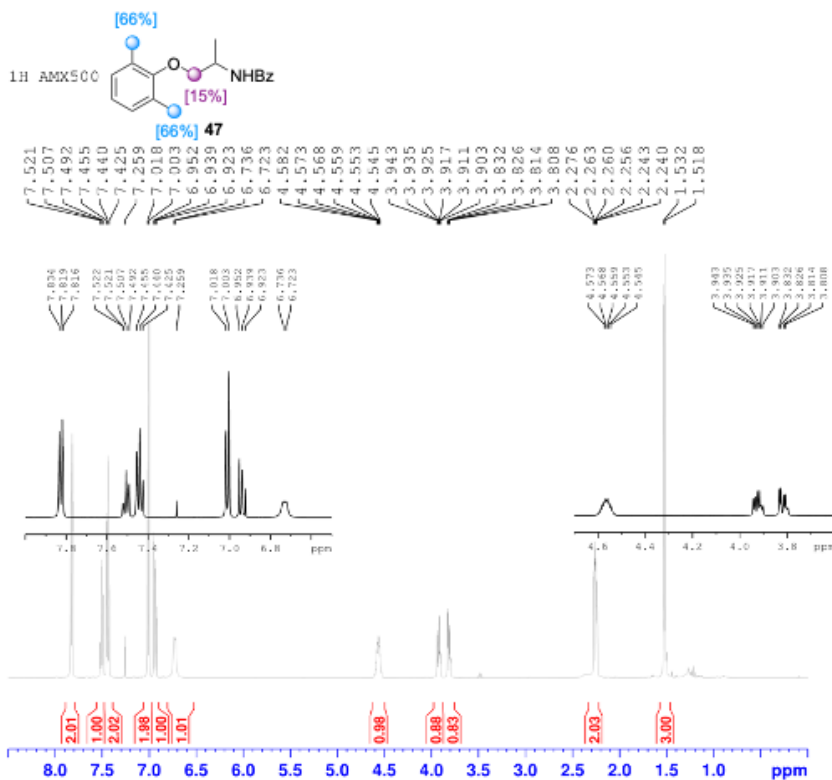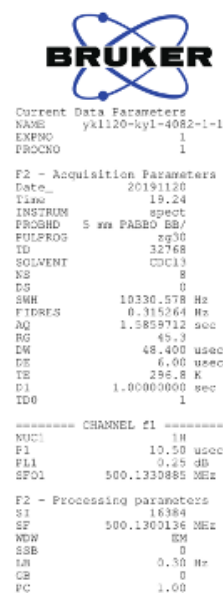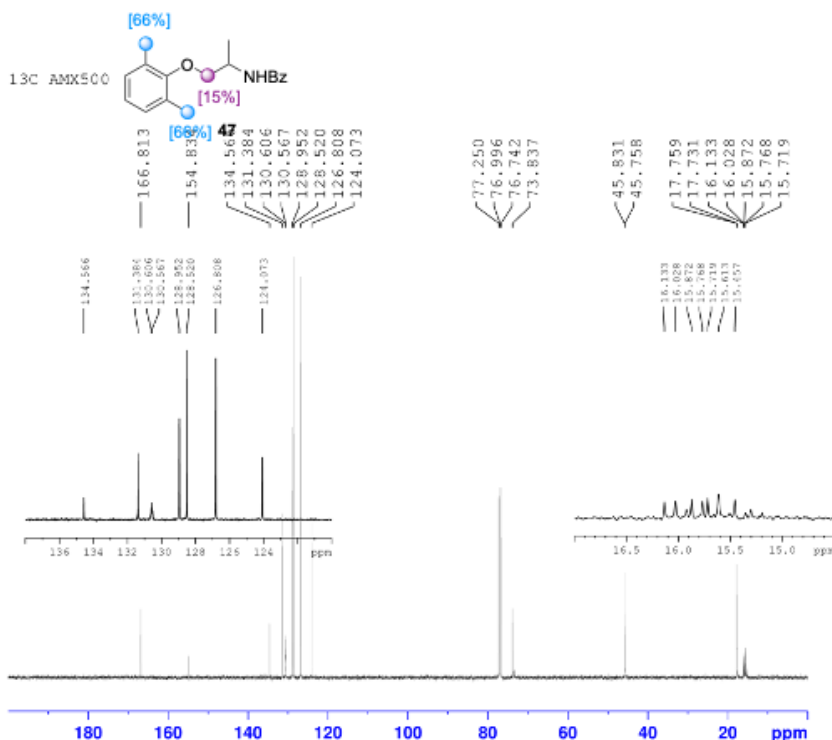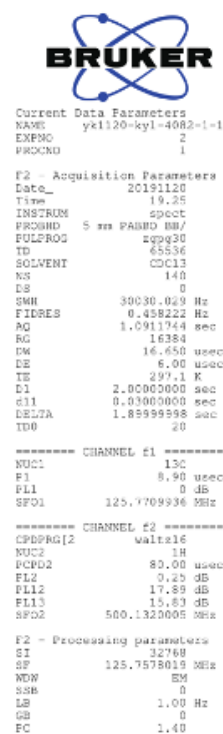

2H AV 500 NEO 23 May 2017 D NMR in CHCl3

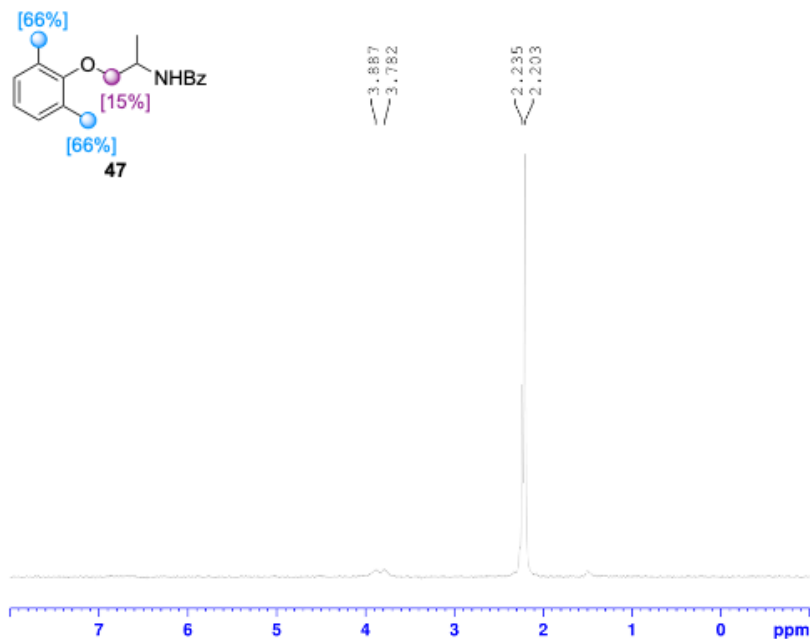

Current Data Parameters  
NAME thd-19  
EXPNO 2  
PROCNO 1

F2 - Acquisition Parameters  
Date\_ 20200624  
Time 15.46 h  
INSTRUM CPM AV4 500 MHz BASIC  
PROBHD 144369\_0005 (g2h.2  
PULPROG zgpg30  
TD 65536  
SOLVENT CDCl3  
NS 16  
DS 2  
SWH 1562.500 Hz  
FIDRES 0.381470 Hz  
AQ 2.6214399 sec  
RG 12.5  
RW 320.200 usec  
DE 6.50 usec  
TE 298.0 K  
D1 1.00000000 sec  
d11 0.03000000 sec  
TD0 1  
SFO1 76.7885582 MHz  
NUC1 1H  
P1 349.30 usec  
PL1 3.50000000 W

F2 - Processing parameters  
SI 65536  
SF 76.7883510 MHz  
RG 8  
SSB 0  
LB 0.30 Hz  
GB 0  
PC 1.00

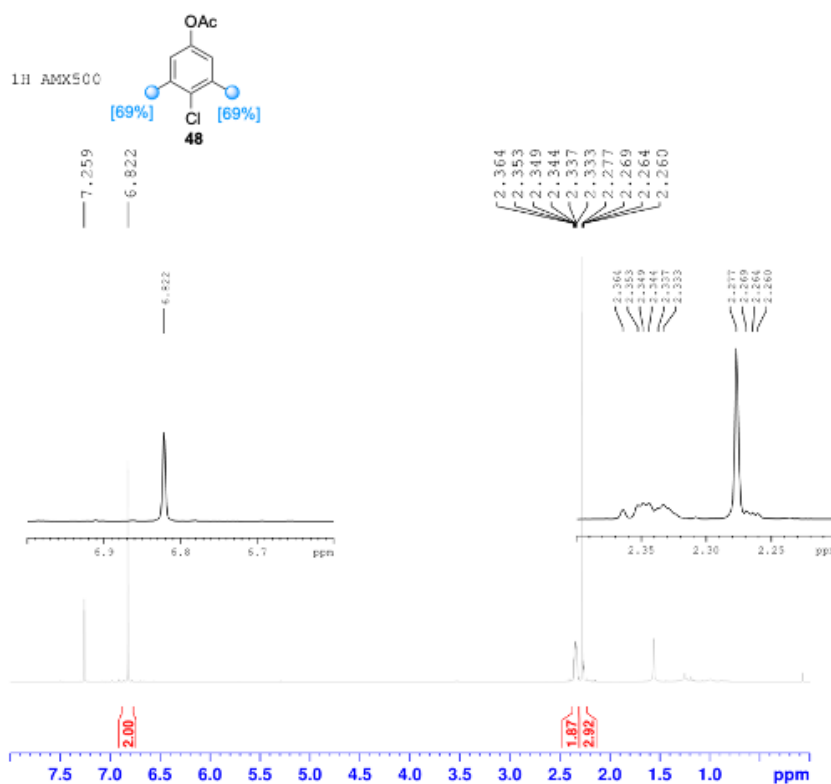

Current Data Parameters  
NAME yx1222=kyl-4072-7-1  
EXPNO 1  
PROCNO 1

F2 - Acquisition Parameters  
Date\_ 20191222  
Time 11.30  
INSTRUM spect  
PROBHD 5 mm PABBO BB/  
PULPROG zg30  
TD 32768  
SOLVENT CDCl3  
NS 8  
DS 0  
SWH 10330.570 Hz  
FIDRES 0.215264 Hz  
AQ 1.5859712 sec  
RG 228.1  
RW 48.400 usec  
DE 6.00 usec  
TE 297.0 K  
D1 1.00000000 sec  
TD0 1

===== CHANNEL f1 =====  
NUC1 1H  
P1 10.50 usec  
PL1 0.25 dB  
SFO1 500.1330885 MHz

F2 - Processing parameters  
SI 16384  
SF 500.1300143 MHz  
RG 819  
SSB 0  
LB 0.30 Hz  
GB 0  
PC 1.00

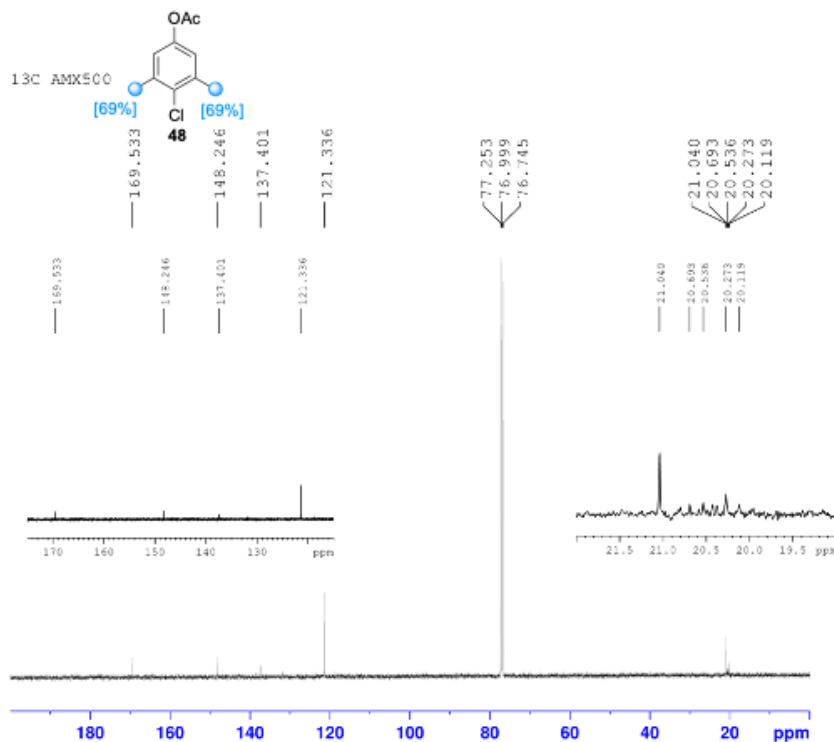

**BRUKER**

Current Data Parameters  
 NAME yk1222-ky1-4072-7-1  
 EXPNO 2  
 PROCNO 1

F2 - Acquisition Parameters  
 Date\_ 20191222  
 Time 11.32  
 INSTRUM spect  
 PROSHD 5 mm PABBO BB/  
 PULPROG zgpg30  
 ID 65536  
 SOLVENT CDCl3  
 NS 327  
 DS 0  
 SMH 30030.029 Hz  
 FIDRES 0.458222 Hz  
 AQ 1.0911744 sec  
 RG 16384  
 DW 16.450 usec  
 DE 6.00 usec  
 TE 297.1 K  
 D1 2.0000000 sec  
 c11 0.0300000 sec  
 DELTA 1.8595598 sec  
 TD0 20

===== CHANNEL f1 =====  
 NUC1 <sup>13</sup>C  
 P1 8.90 usec  
 PL1 0 dB  
 SFO1 125.770936 MHz

===== CHANNEL f2 =====  
 CPDPRG2 waltz16  
 NUC2 <sup>1</sup>H  
 PCDP2 80.00 usec  
 PL2 0.25 dB  
 PL12 17.89 dB  
 PL13 15.83 dB  
 SFO2 500.1320005 MHz

F2 - Processing parameters  
 SI 32768  
 SF 125.7577919 MHz  
 NDNW 5M  
 SSB 0  
 LB 1.00 Hz  
 GB 0  
 PC 1.40

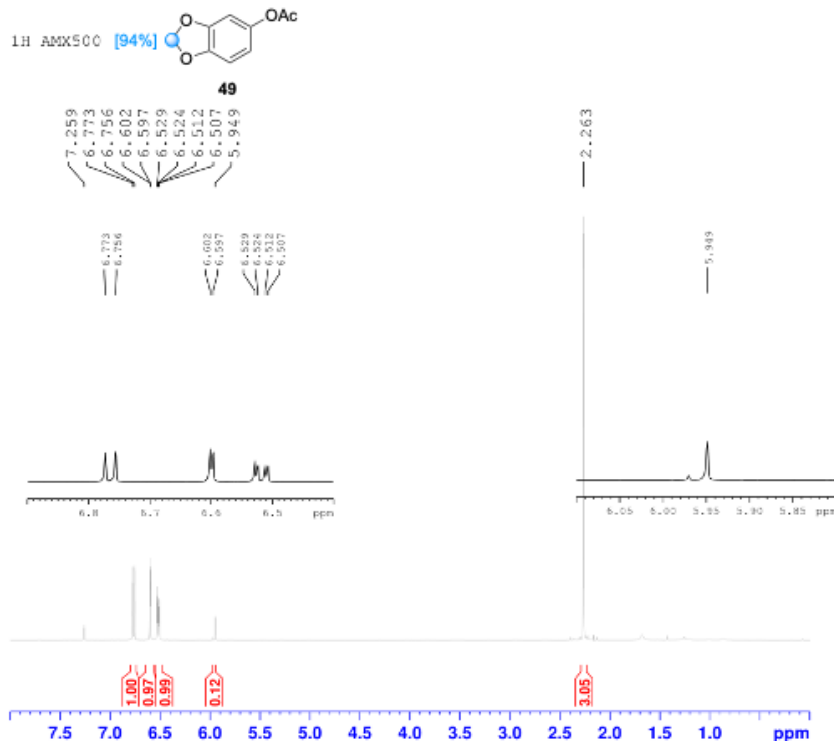

**BRUKER**

Current Data Parameters  
 NAME yk1211-ky1-4198-2-1  
 EXPNO 1  
 PROCNO 1

F2 - Acquisition Parameters  
 Date\_ 20191211  
 Time 20.08  
 INSTRUM spect  
 PROSHD 5 mm PABBO BB/  
 PULPROG zg30  
 ID 32768  
 SOLVENT CDCl3  
 NS 8  
 DS 0  
 SMH 10130.578 Hz  
 FIDRES 0.315264 Hz  
 AQ 1.5839712 sec  
 RG 101.6  
 DW 48.400 usec  
 DE 6.00 usec  
 TE 295.0 K  
 D1 1.0000000 sec  
 TD0 1

===== CHANNEL f1 =====  
 NUC1 <sup>1</sup>H  
 P1 10.50 usec  
 PL1 0.25 dB  
 SFO1 500.1330885 MHz

F2 - Processing parameters  
 SI 16384  
 SF 500.1300136 MHz  
 NDNW 5M  
 SSB 0  
 LB 0.30 Hz  
 GB 0  
 PC 1.00

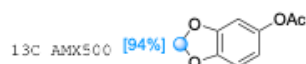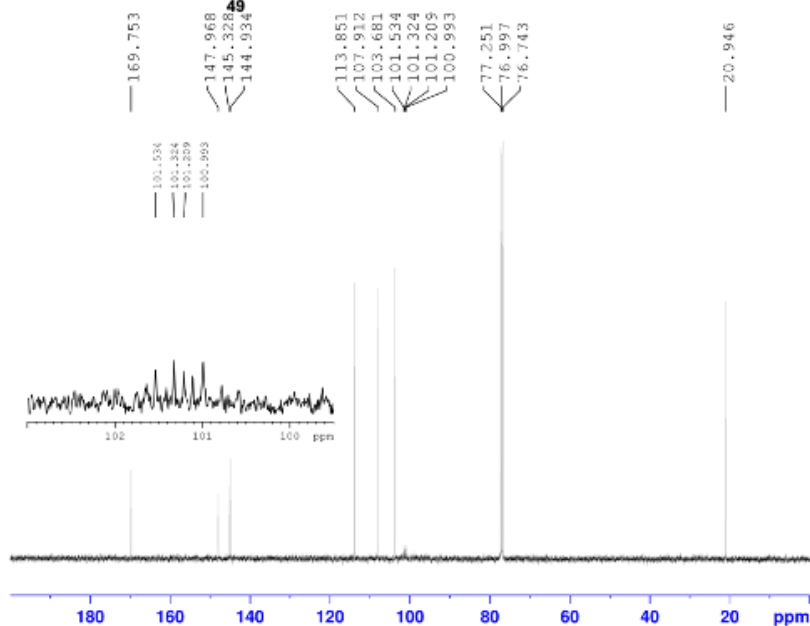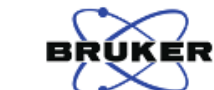

Current Data Parameters  
NAME yx1211-kyl-4098-2-1  
EXPNO 2  
PROCNO 1

F2 - Acquisition Parameters  
Date\_ 20191211  
Time 20.10  
INSTRUM spect  
PROBHD 5 mm PABBO BB/  
PULPROG zgpg30  
TD 65536  
SOLVENT CDCl3  
NS 196  
DS 0  
SMH 30030.029 Hz  
FIDRES 0.458222 Hz  
AQ 1.0911744 sec  
RG 16384  
RM 16.450 usec  
DE 6.00 usec  
TE 296.0 K  
D1 2.0000000 sec  
c11 0.0300000 sec  
DELTA 1.8599598 sec  
TD0 20

===== CHANNEL f1 =====  
NUC1 13C  
P1 8.90 usec  
PL1 0 dB  
SFO1 125.770936 MHz

===== CHANNEL f2 =====  
CPDPRG2 waltz16  
NUC2 1H  
PCPD2 80.00 usec  
PL2 0.25 dB  
PL12 17.89 dB  
PL13 15.83 dB  
SFO2 500.1320005 MHz

F2 - Processing parameters  
SI 32768  
SF 125.7577961 MHz  
WDW EM  
SSB 0  
LB 1.00 Hz  
GB 0  
FC 1.40

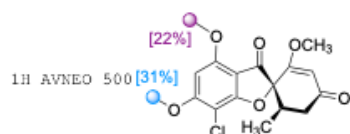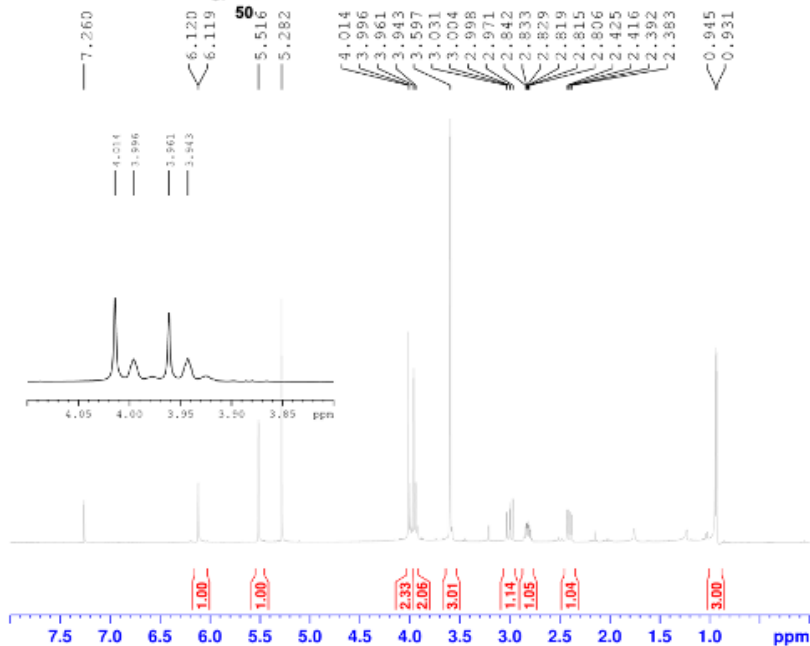

Current Data Parameters  
NAME yx0303-kyl-4093-2  
EXPNO 1  
PROCNO 1

F2 - Acquisition Parameters  
Date\_ 20200303  
Time 20.08 h  
INSTRUM Avance  
PROBHD Z169738.0003 (4  
PULPROG zg30  
TD 65536  
SOLVENT CDCl3  
NS 8  
DS 2  
SMH 10000.000 Hz  
FIDRES 0.306175 Hz  
AQ 3.2767993 sec  
RG 101  
DM 50.000 usec  
DE 11.14 usec  
TE 296.0 K  
D1 1.0000000 sec  
TD0 1  
SFO1 500.1330883 MHz  
NUC1 1H  
P0 2.67 usec  
PL1 8.00 usec  
PLW1 24.45705073 W

F2 - Processing parameters  
SI 65536  
SF 500.1300118 MHz  
WDW EM  
SSB 0  
LB 0.30 Hz  
GB 0  
FC 1.00

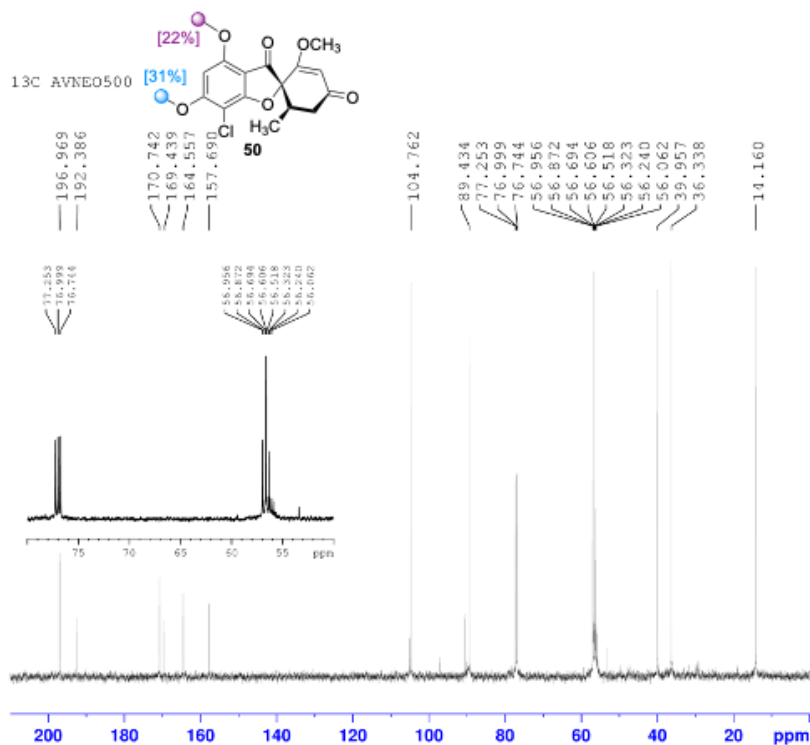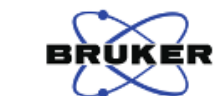

Current Data Parameters  
NAME yk0303-kyl-4043-2  
EXPNO 2  
PROCNO 1

F2 - Acquisition Parameters  
Date\_ 20200303  
Time 20.19 h  
INSTRUM Avance  
PROBHD z169738\_0003 (4  
PULPROG zgpg30  
TD 65536  
SOLVENT CDCl3  
NS 203  
DS 2  
SWH 30120.462 Hz  
FIDRES 0.919204 Hz  
AQ 1.0078977 sec  
RG 101  
DM 16.600 usec  
DE 6.72 usec  
TE 294.2 K  
D1 2.00000000 sec  
D11 0.03000000 sec  
TD0 1  
SFO1 125.760931 MHz  
NUC1 13C  
P1 9.00 usec  
PLW1 110.75999564 W  
SFO2 500.1320005 MHz  
NUC2 1H  
PCPD2 80.00 usec  
PLW2 24.45700073 W  
PLW2 0.24457000 W  
PLW3 0.12302000 W

F2 - Processing parameters  
SI 65536  
SF 125.7577980 MHz  
WDW EM  
SSB 0  
LB 2.00 Hz  
GB 0  
PC 1.40

2H AV 500 NEO 23 May 2017 D NMR in CHCl3

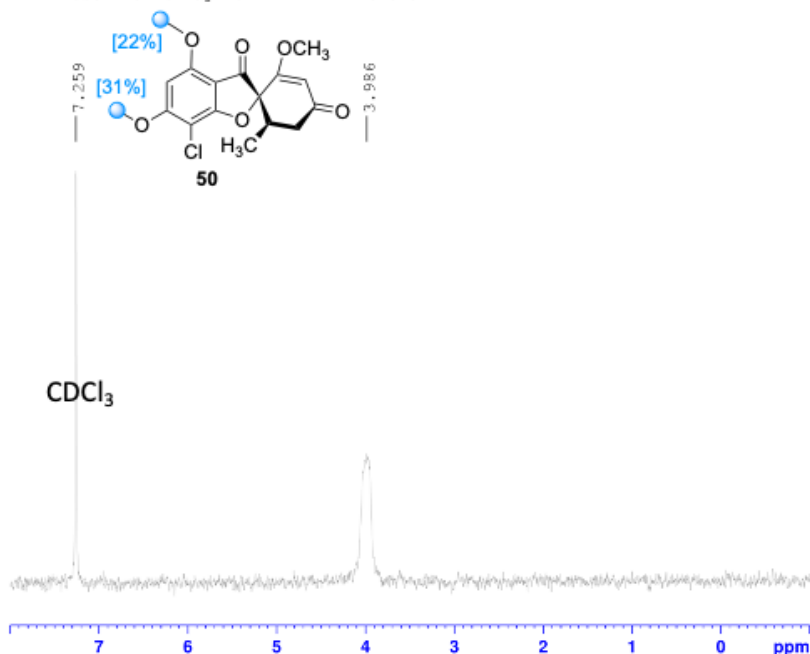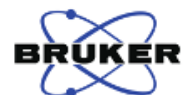

Current Data Parameters  
NAME thd-21  
EXPNO 2  
PROCNO 1

F2 - Acquisition Parameters  
Date\_ 20200624  
Time 15.50 h  
INSTRUM CAB AV4 500 MHz BASIC  
PROBHD z144569\_0005 (4  
PULPROG zgpg30  
TD 8192  
SOLVENT CDCl3  
NS 8  
DS 2  
SWH 1562.500 Hz  
FIDRES 0.381470 Hz  
AQ 2.6214399 sec  
RG 13.8589  
DM 320.000 usec  
DE 6.50 usec  
TE 295.0 K  
D1 1.00000000 sec  
D11 0.03000000 sec  
TD0 1  
SFO1 76.7885582 MHz  
NUC1 2H  
P1 349.30 usec  
PLW1 3.50000000 W

F2 - Processing parameters  
SI 65536  
SF 76.7883494 MHz  
WDW EM  
SSB 0  
LB 0.30 Hz  
GB 0  
PC 1.00

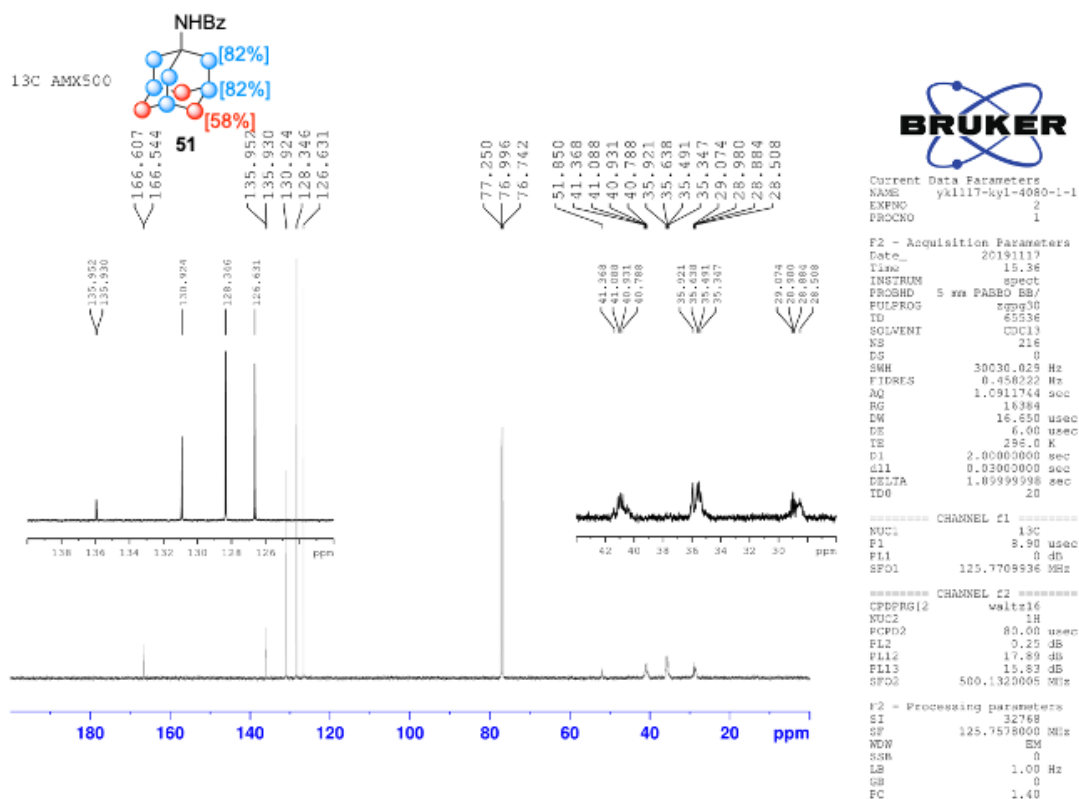

51

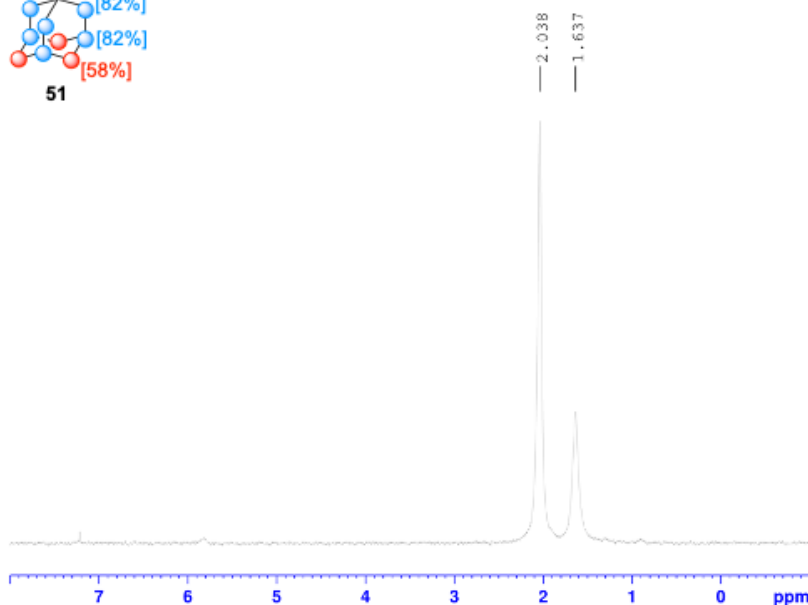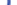

```

F2 - Acquisition Parameters
Date_      20200624
Time       16:50:18
INSTRUM    CAB AY4 500 NMR SAS
PROBHD     z144569.001 QNP 4
PULPROG    zgpg30
TD          8192
DS          4
SOLVENT     CDCl3
NS          8
DS          2
AQ          1562.500 Hrs
RG          321470 Hrs
FIDRES     0.261470 Hz
AQ         2.6214399 sec
RG         12.5
ENF         320.0000
TE         6.5000000
WE         238.0 K
C11         1.00000000
C12         0.33000000
TEO         1.00000000
SFOL       76.7885852 MHz
MPC1       2 H
P1         349.30
P2         3.5000000

```

```
F2 - Processing parameters
SI          65536
SF          96.7883510 MHz
KDN         800
SSM         0
LB          0.30 Hz
GB         0
PC         1.00
```

1H AMX500

N#Cc1ccc2c(c1)C3CC4C(C2)C(C3)C4

[<2%] [<2%]

7.433  
7.421  
7.419  
7.387  
7.372  
7.360  
7.357  
7.259

52

5.903

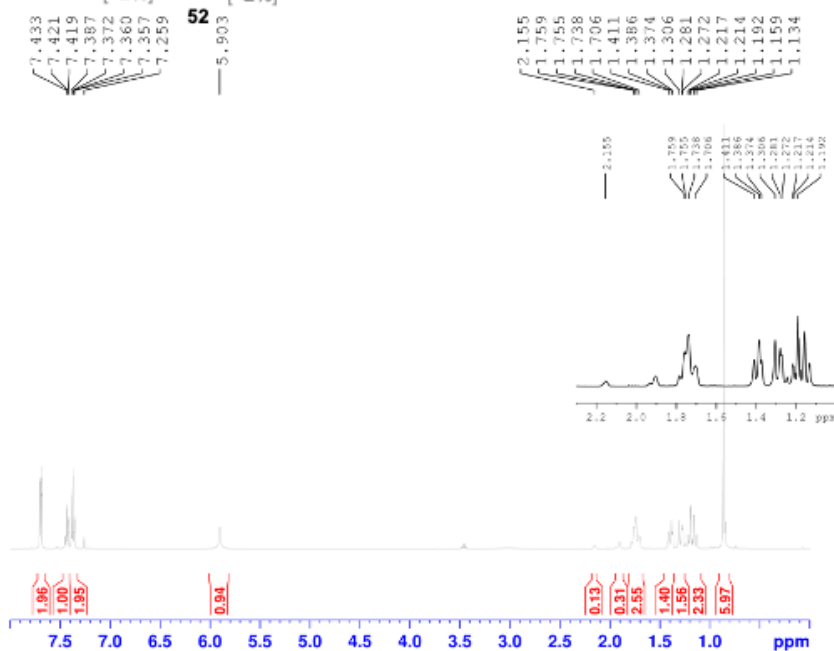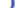

```

F2 - Acquisition Parameters
Date_      20191011
Time       20.42
INSTRUM    spect
PROBHD     5 mm PABBO mm/
PULPROG    zg30
TD         32768
SOLVENT    CDCl3
NS         8
DS         0
SWH        10330.578 Hz
FIDRES     0.215264 Hz
AQ         1.5859712 sec
RG         35.5
CW         48.400 usec
DE         6.00 usec
TE         295.5 K
D1         1.0000000 sec
TD0        1

```

```
===== CHANNEL #1 =====  
NUC1                1H  
F1                  10.50 uHz  
FL1                 0.25 dB  
SFO1               500.133086 MHz
```

```
F2 - Processing parameters
SI          16384
SF          500.1300136 MHz
WDW         EM
SSB         0
LB          0.30 Hz
GB          U
PC          1.00
```

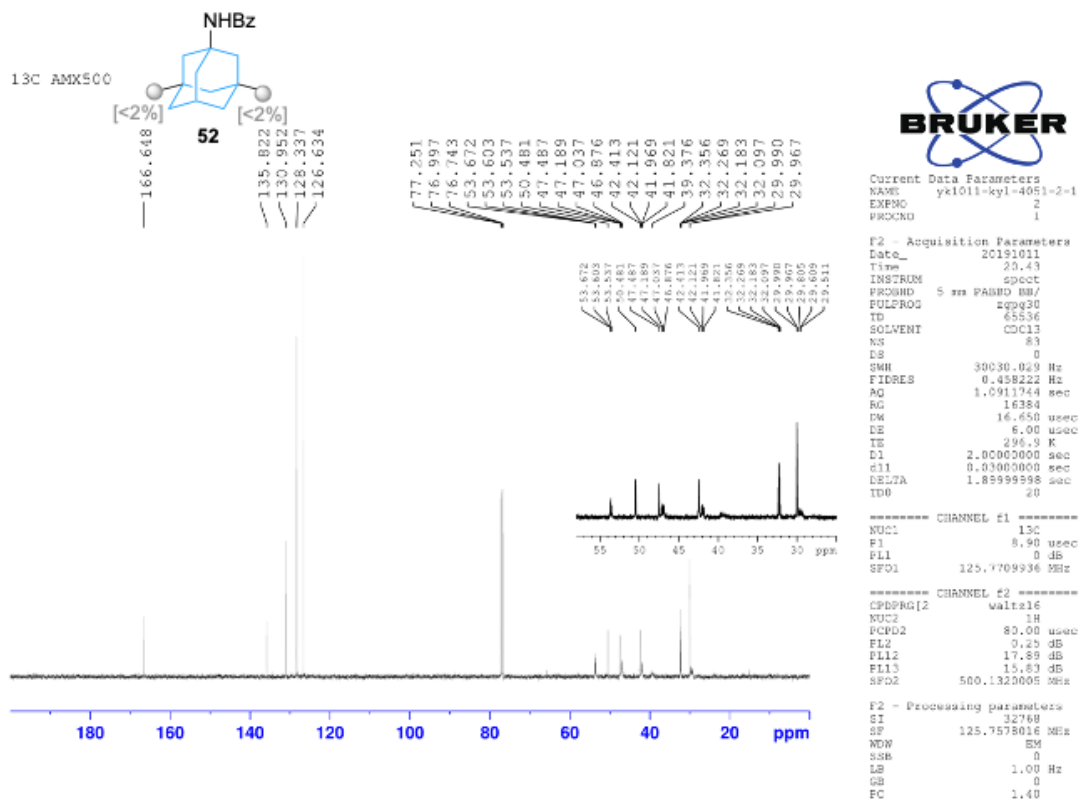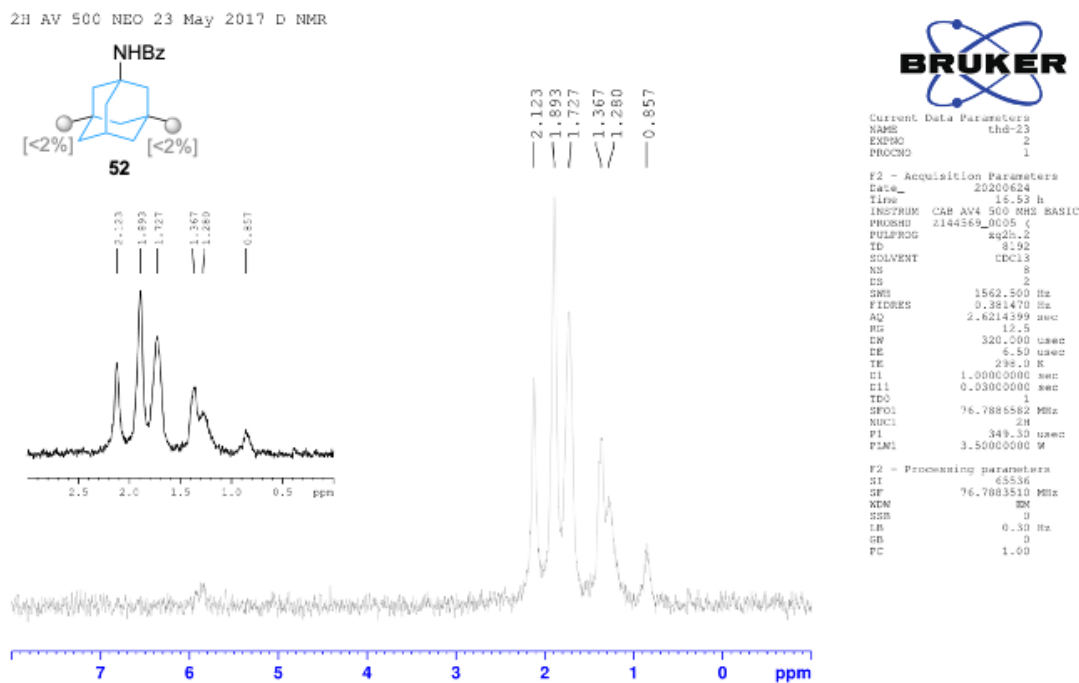

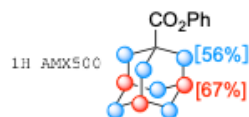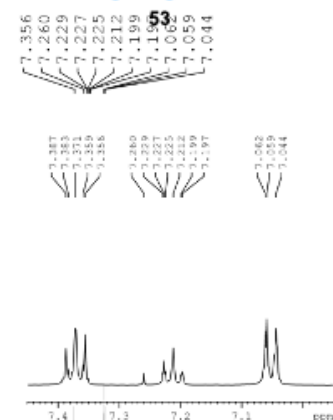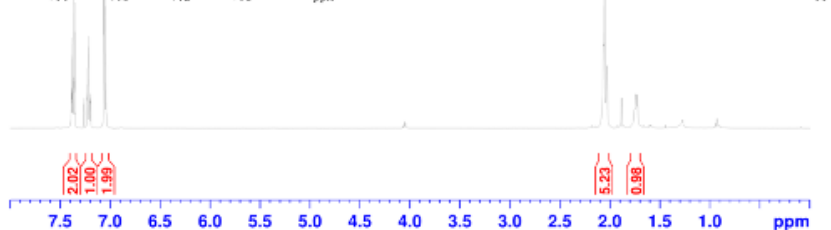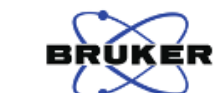

Current Data Parameters  
NAME yk1120-ky1-4085-3-1  
EXPNO 1  
PROCNO 1

F2 - Acquisition Parameters  
Date\_ 20191120  
Time 18.59  
INSTRUM spect  
PROBHD 5 mm PABBO BB/  
PULPROG zgpg30  
TD 32768  
SOLVENT CDCl3  
NS 8  
DS 0  
SMH 10330.570 Hz  
FIDRES 0.315264 Hz  
AQ 1.5859712 sec  
RG 57  
RM 68.400 usec  
DE 6.00 usec  
TE 296.2 K  
D1 1.00000000 sec  
TD0 1

===== CHANNEL f1 =====  
NUC1 <sup>1</sup>H  
P1 10.50 usec  
PL1 0.25 dB  
SFO1 500.1330085 MHz  
F2 - Processing parameters  
SI 16384  
SF 500.1300135 MHz  
WDW EM  
SSB 0  
LB 0.30 Hz  
GB 0  
PC 1.00

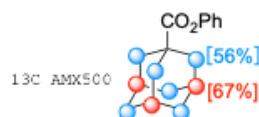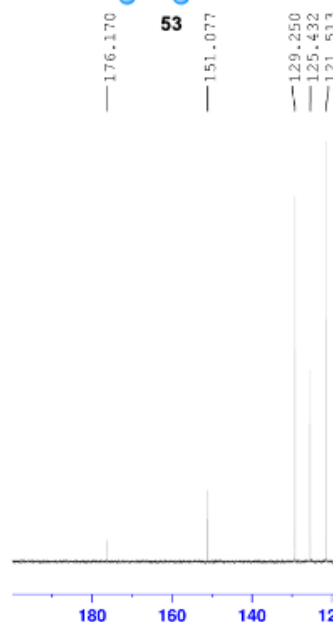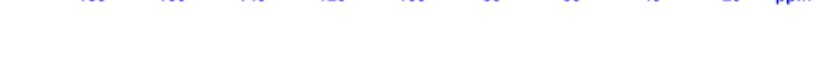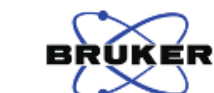

Current Data Parameters  
NAME yk1120-ky1-4085-3-1  
EXPNO 2  
PROCNO 1

F2 - Acquisition Parameters  
Date\_ 20191120  
Time 19.00  
INSTRUM spect  
PROBHD 5 mm PABBO BB/  
PULPROG zgpg30  
TD 85536  
SOLVENT CDCl3  
NS 170  
DS 0  
SMH 30030.029 Hz  
FIDRES 0.450222 Hz  
AQ 1.0911744 sec  
RG 16384  
RM 16.850 usec  
DE 6.00 usec  
TE 297.4 K  
D1 2.00000000 sec  
C11 0.03000000 sec  
DELTA 1.89999998 sec  
TD0 20

===== CHANNEL f1 =====  
NUC1 <sup>13</sup>C  
P1 8.90 usec  
PL1 0 dB  
SFO1 125.7709536 MHz  
===== CHANNEL f2 =====  
CPDPRG2 waltz16  
NUC2 <sup>1</sup>H  
PCPD2 80.00 usec  
PL2 0.25 dB  
PL12 17.80 dB  
PL13 15.82 dB  
SFO2 500.1320005 MHz

F2 - Processing parameters  
SI 32768  
SF 125.7577987 MHz  
WDW EM  
SSB 0  
LB 1.00 Hz  
GB 0  
PC 1.40

2H AV 500 NEO 23 May 2017 D NMR

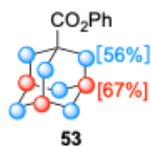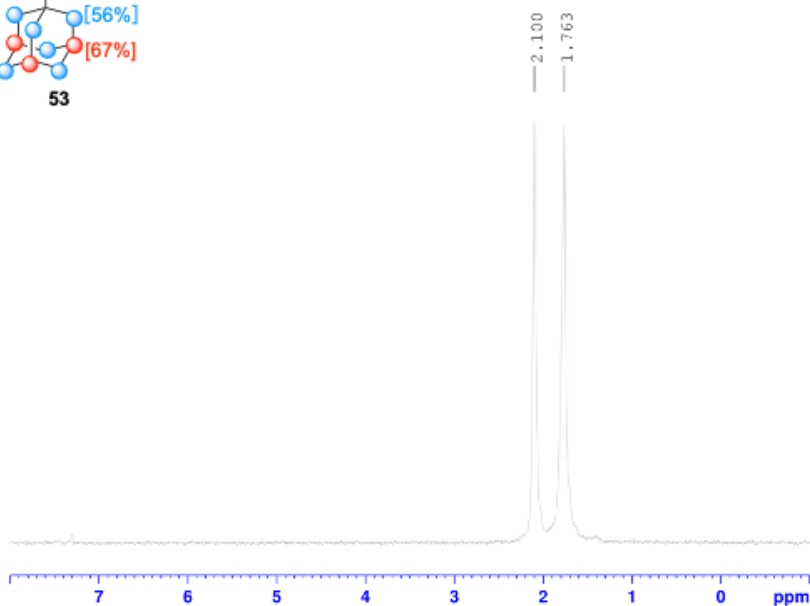

Current Data Parameters  
NAME thd-24  
EXPNO 2  
PROCNO 1

F2 - Acquisition Parameters  
Date\_ 20200623  
Time 15.12 h  
INSTRUM CPM AV4 500 MHz BASIC  
PROBHD 1144569\_0005 (g2h.2)  
PULPROG zgpg30  
TD 65536  
SOLVENT DMSO  
NS 16  
DS 4  
SWH 1562.500 Hz  
FIDRES 0.381470 Hz  
AQ 2.6214399 sec  
RG 12.5  
CW 320.000 usec  
DE 6.50 usec  
TE 298.0 K  
D1 1.00000000 sec  
E1 0.03000000 sec  
TD0 1  
SFO1 76.7885582 MHz  
NUC1 2H  
P1 349.30 usec  
PL1 3.50000000 W

F2 - Processing parameters  
SI 65536  
SF 76.7883028 MHz  
RG 8  
SSB 0  
LB 0.30 Hz  
GB 0  
PC 1.00

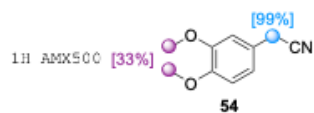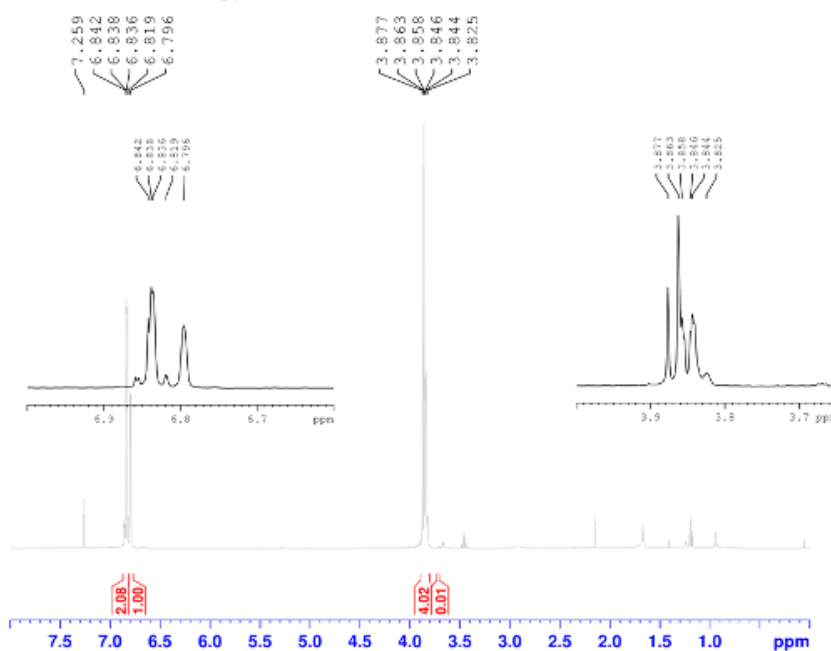

Current Data Parameters  
NAME yx1211-kyl-4105-1-1  
EXPNO 1  
PROCNO 1

F2 - Acquisition Parameters  
Date\_ 20191211  
Time 20.22  
INSTRUM spect  
PROBHD 5 mm PABBO BB/  
PULPROG zgpg30  
TD 32768  
SOLVENT CDCl3  
NS 8  
DS 0  
SWH 10330.570 Hz  
FIDRES 0.215264 Hz  
AQ 1.5859712 sec  
RG 101.6  
CW 48.400 usec  
DE 6.00 usec  
TE 296.6 K  
D1 1.00000000 sec  
TD0 1

===== CHANNEL f1 =====  
NUC1 1H  
P1 10.50 usec  
PL1 0.25 dB  
SFO1 500.1330885 MHz  
F2 - Processing parameters  
SI 16384  
SF 500.1300137 MHz  
RG 64  
SSB 0  
LB 0.30 Hz  
GB 0  
PC 1.00

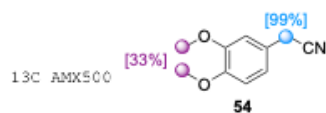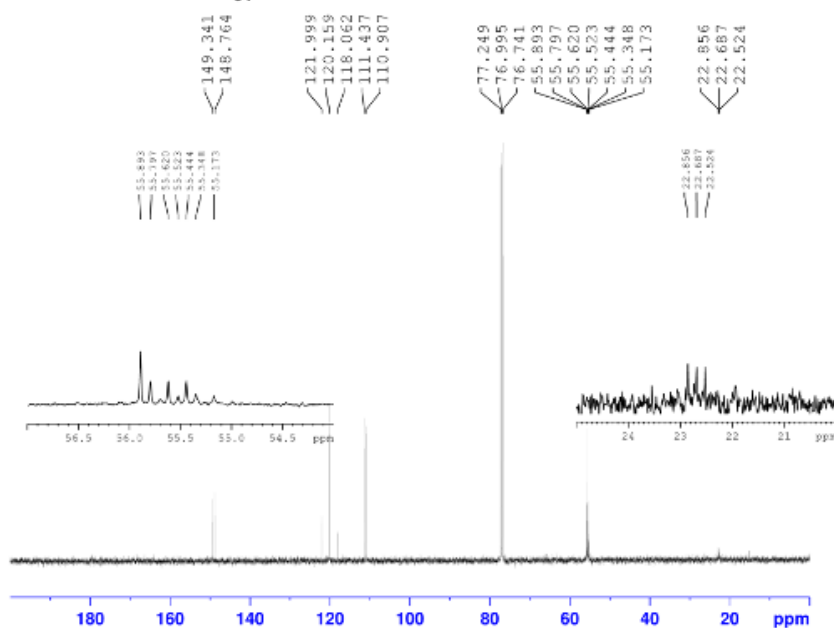

**BRUKER**

Current Data Parameters  
NAME yk1211-kyl-4105-1-1  
EXPNO 2  
PROCNO 1

F2 - Acquisition Parameters  
Date\_ 20191211  
Time 20.23  
INSTRUM spect  
PROBHD 5 mm PABBO BB/  
PULPROG zgpg30  
TD 65536  
SOLVENT CDCl3  
NS 169  
DS 0  
SWH 30030.029 Hz  
FIDRES 0.458222 Hz  
AQ 1.0911744 sec  
RG 16384  
TM 16.450 usec  
DE 6.00 usec  
TE 297.0 K  
D1 2.0000000 sec  
c11 0.0300000 sec  
DELTA 1.8599598 sec  
TD0 20

===== CHANNEL f1 =====  
NUC1 13C  
P1 8.90 usec  
PL1 0 dB  
SFO1 125.770936 MHz

===== CHANNEL f2 =====  
CPDPRG2 waltz16  
NUC2 1H  
PCPD2 80.00 usec  
PL2 0.25 dB  
PL12 17.89 dB  
PL13 15.83 dB  
SFO2 500.132005 MHz

F2 - Processing parameters  
SI 32768  
SF 125.7578000 MHz  
WDW EM  
SSB 0  
LA 1.00 Hz  
GB 0  
PC 1.40

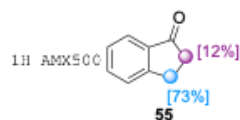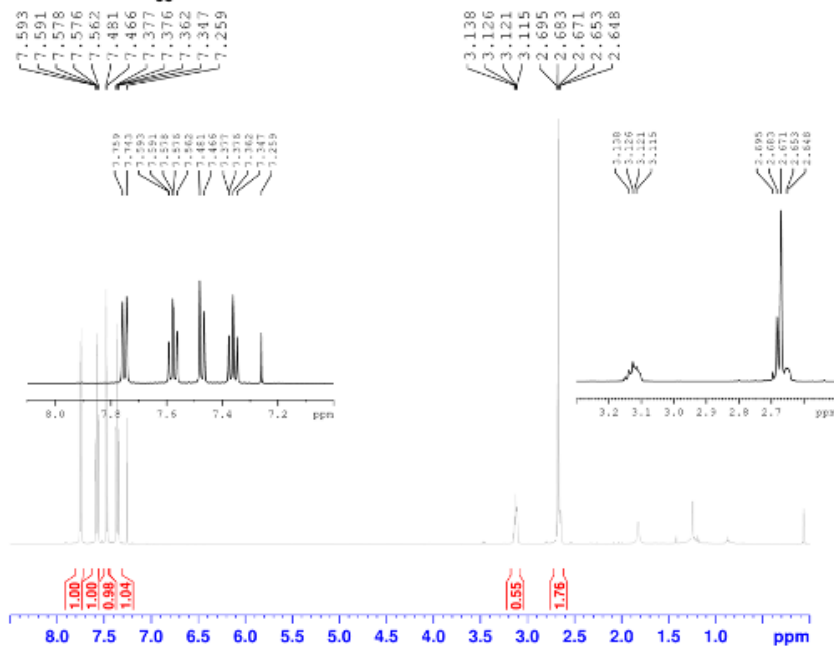

**BRUKER**

Current Data Parameters  
NAME yk01007-kyl-4042-1-1  
EXPNO 1  
PROCNO 1

F2 - Acquisition Parameters  
Date\_ 20191007  
Time 20.45  
INSTRUM spect  
PROBHD 5 mm PABBO BB/  
PULPROG zgpg30  
TD 32768  
SOLVENT CDCl3  
NS 0  
DS 0  
SWH 10330.578 Hz  
FIDRES 0.315264 Hz  
AQ 1.5855712 sec  
RG 101.6  
EN 48.400 usec  
DE 6.00 usec  
TE 296.2 K  
D1 1.0000000 sec  
TD0 1

===== CHANNEL f1 =====  
NUC1 1H  
P1 10.50 usec  
PL1 0.25 dB  
SFO1 500.133085 MHz

F2 - Processing parameters  
SI 16384  
SF 500.1330137 MHz  
WDW EM  
SSB 0  
LA 0.30 Hz  
GB 0  
PC 1.00

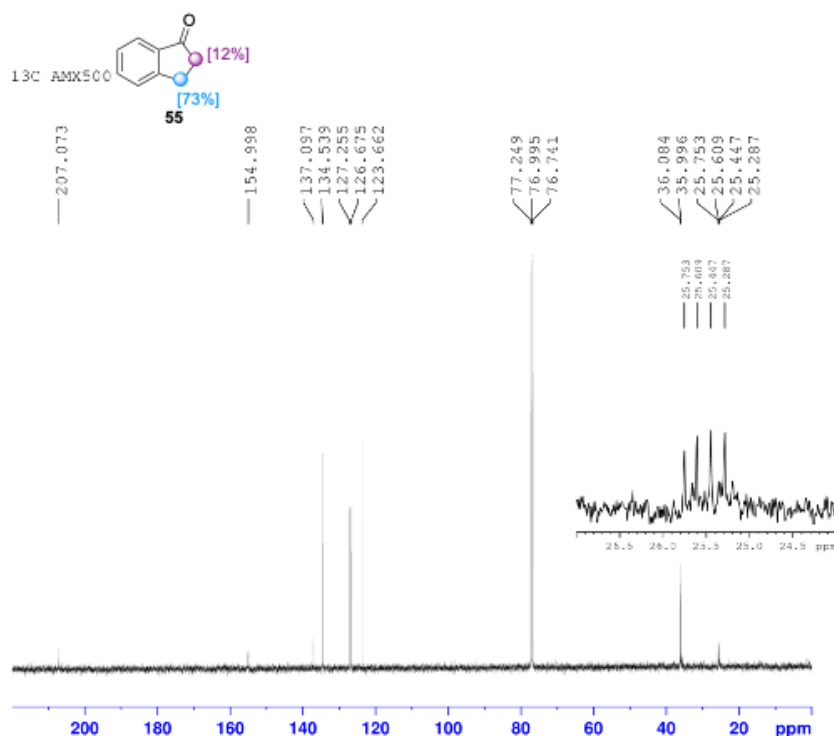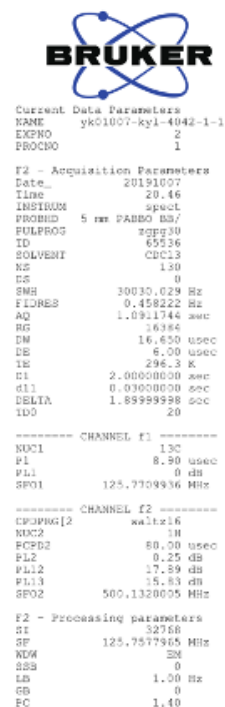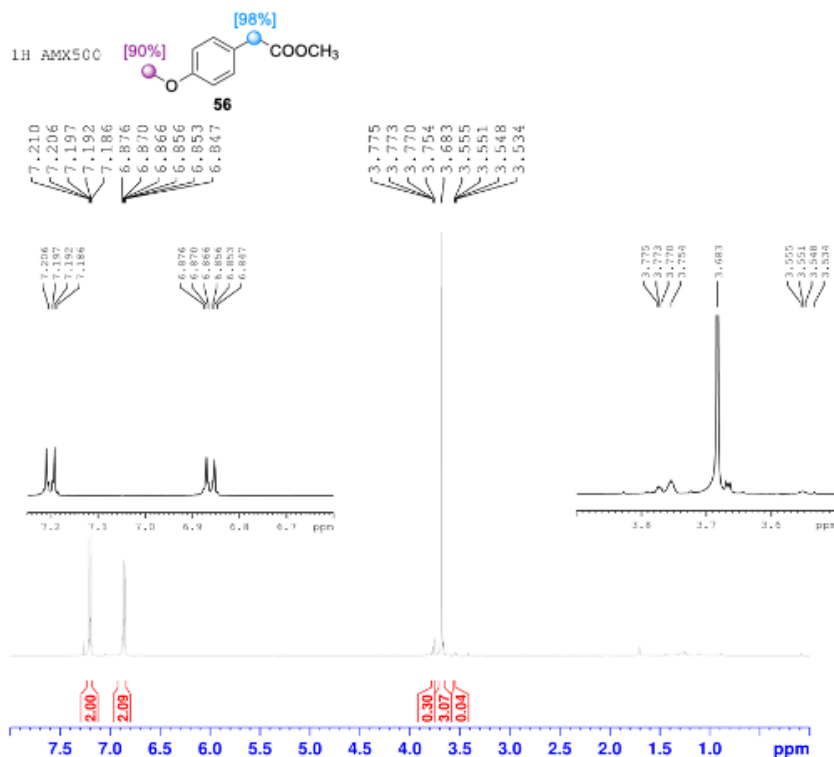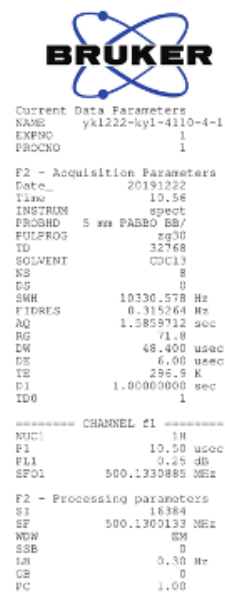

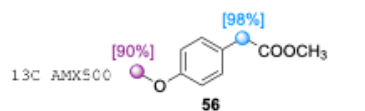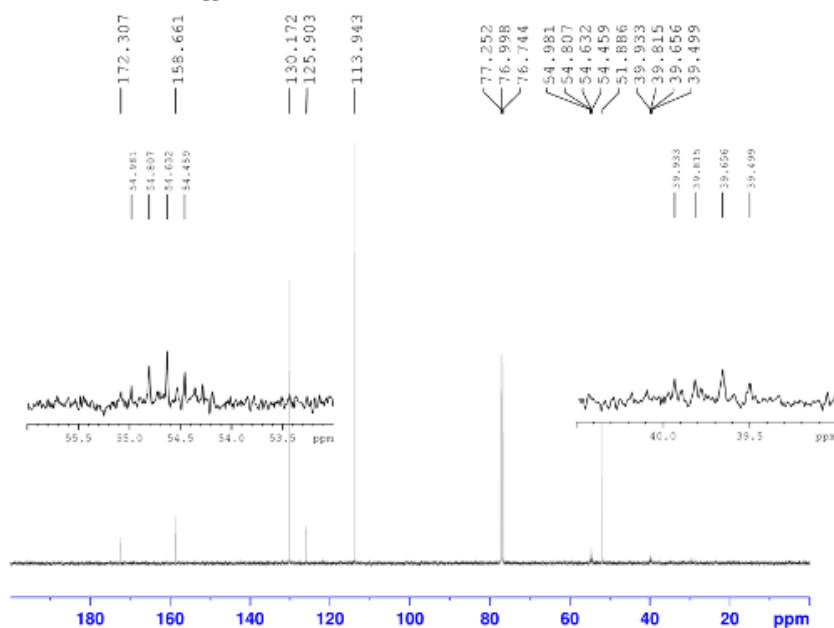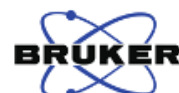

Current Data Parameters  
NAME yk1222-kyl-4110-4-1  
EXPNO 2  
PROCNO 1

F2 - Acquisition Parameters  
Date\_ 20191222  
Time 10.57  
INSTRUM spect  
PROBHD 5 mm PABBO BB/  
PULPROG zgpg30  
TD 65536  
SOLVENT CDCl3  
NS 145  
DS 0  
SMH 30030.029 Hz  
FIDRES 0.458222 Hz  
AQ 1.0911744 sec  
RG 16384  
RW 16.450 usec  
DE 6.00 usec  
TE 297.2 K  
D1 2.0000000 sec  
c11 0.0300000 sec  
DELTA 1.8599998 sec  
TD0 20

===== CHANNEL f1 =====  
NUC1 13C  
P1 8.90 usec  
PL1 0 dB  
SFO1 125.770936 MHz

===== CHANNEL f2 =====  
CPDPRG2 waltz16  
NUC2 1H  
PCPD2 80.00 usec  
PL2 0.25 dB  
PL12 17.89 dB  
PL13 15.83 dB  
SFO2 500.1320005 MHz

F2 - Processing parameters  
SI 32768  
SF 125.7577984 MHz  
WDW EM  
SSB 0  
LB 1.00 Hz  
GB 0  
FC 1.40

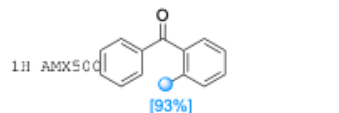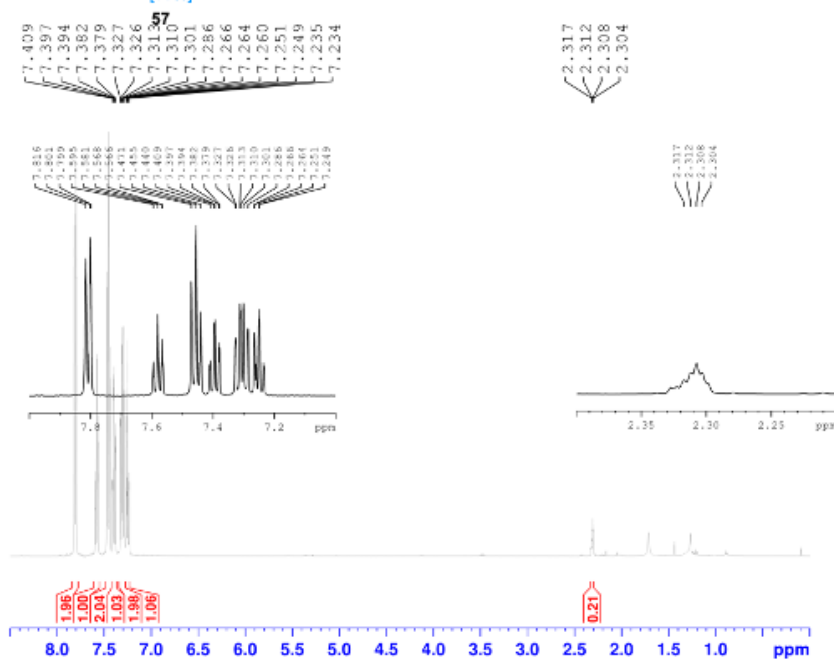

Current Data Parameters  
NAME yk0102-kyl-4118-5-1  
EXPNO 1  
PROCNO 1

F2 - Acquisition Parameters  
Date\_ 20200102  
Time 17.18  
INSTRUM spect  
PROBHD 5 mm PABBO BB/  
PULPROG zg30  
TD 32768  
SOLVENT CDCl3  
NS 8  
DS 0  
SMH 10330.578 Hz  
FIDRES 0.215264 Hz  
AQ 1.5859712 sec  
RG 71.8  
RW 48.400 usec  
DE 6.00 usec  
TE 295.5 K  
D1 1.0000000 sec  
TD0 1

===== CHANNEL f1 =====  
NUC1 1H  
P1 10.50 usec  
PL1 0.25 dB  
SFO1 500.1330885 MHz

F2 - Processing parameters  
SI 16384  
SF 500.1300136 MHz  
WDW EM  
SSB 0  
LB 0.30 Hz  
GB 0  
FC 1.00

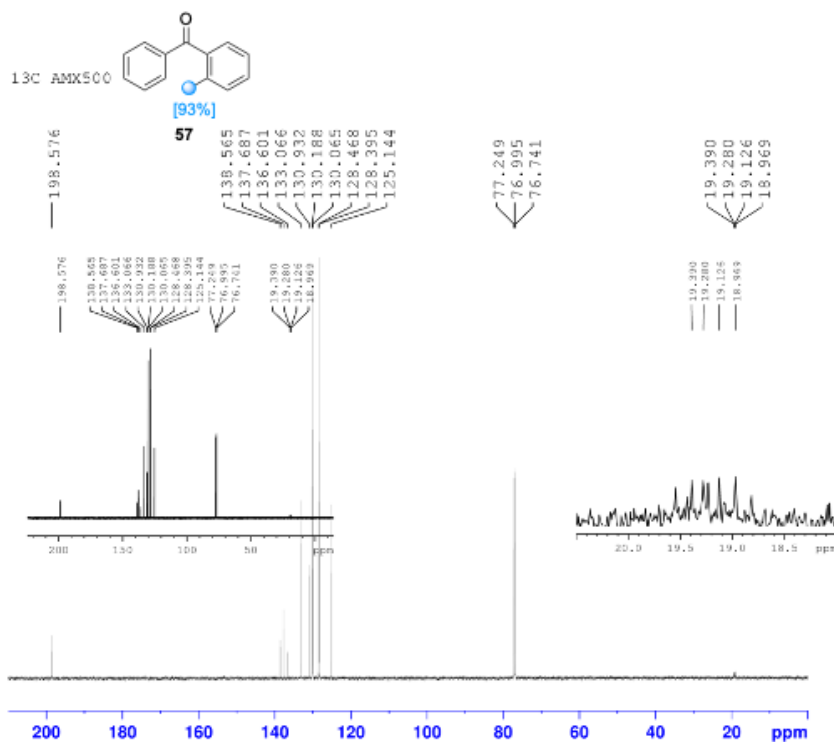

**BRUKER**

Current Data Parameters  
 NAME: yk0102-kyl-4118-5-1  
 EXPNO: 3  
 PROCNO: 1

F2 - Acquisition Parameters  
 Date\_: 2020102  
 Time: 17.22  
 INSTRUM: spect  
 FROSHD: 5 mm PABBO BB/  
 PULPROG: zgpg30  
 ID: 65536  
 SOLVENT: CDCl3  
 NS: 155  
 DS: 0  
 SWH: 30030.029 Hz  
 FIDRES: 0.458222 Hz  
 AQ: 1.0911744 sec  
 RG: 18384  
 EQ: 16.650 usec  
 DE: 6.00 usec  
 TE: 296.0 K  
 D1: 2.0000000 sec  
 d11: 0.0000000 sec  
 DELTA: 1.8999999 sec  
 TD0: 20

===== CHANNEL f1 =====  
 NUC1: <sup>13</sup>C  
 P1: 8.90 usec  
 PL1: 0 dB  
 SFO1: 125.7709536 MHz

===== CHANNEL f2 =====  
 CPDPRG2: waitz16  
 NUC2: <sup>1</sup>H  
 PCPD2: 80.00 usec  
 PL2: 0.25 dB  
 PL12: 17.89 dB  
 PL13: 15.82 dB  
 SFO2: 500.1320005 MHz

F2 - Processing parameters  
 SI: 32768  
 SF: 125.7577992 MHz  
 NDW: EM  
 SSB: 0  
 LB: 1.00 Hz  
 GB: 0  
 PC: 1.40

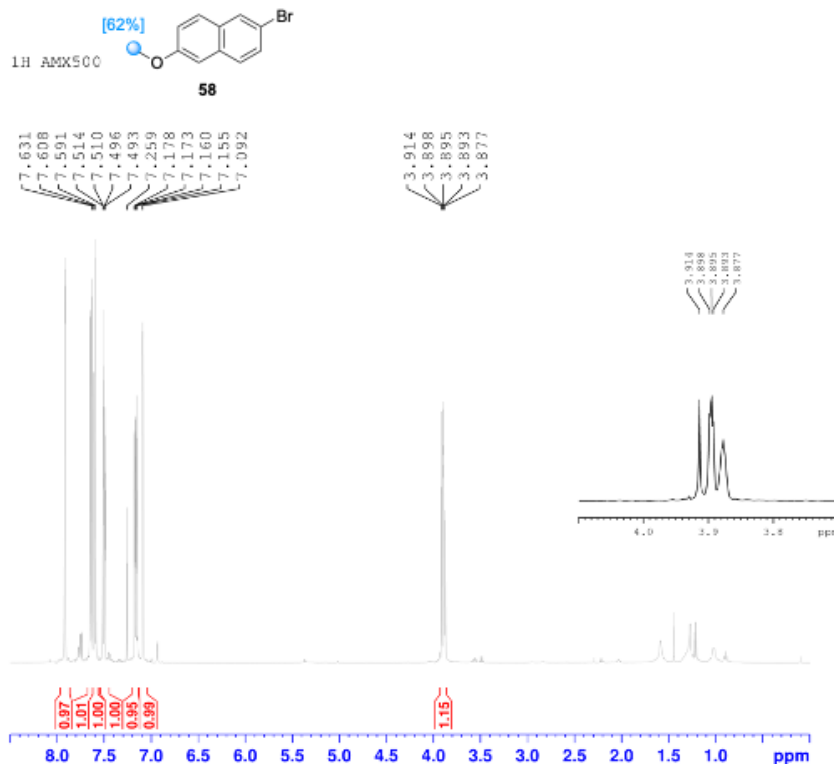

**BRUKER**

Current Data Parameters  
 NAME: yk0113-kyl-4128-1-1  
 EXPNO: 1  
 PROCNO: 1

F2 - Acquisition Parameters  
 Date\_: 2020113  
 Time: 21.04  
 INSTRUM: spect  
 FROSHD: 5 mm PABBO BB/  
 PULPROG: zg30  
 ID: 32768  
 SOLVENT: CDCl3  
 NS: 8  
 DS: 0  
 SWH: 10330.578 Hz  
 FIDRES: 0.315264 Hz  
 AQ: 1.5859712 sec  
 RG: 90.5  
 EQ: 48.400 usec  
 DE: 6.00 usec  
 TE: 296.7 K  
 D1: 1.0000000 sec  
 TD0: 1

===== CHANNEL f1 =====  
 NUC1: <sup>1</sup>H  
 P1: 10.20 usec  
 PL1: 0.25 dB  
 SFO1: 500.1330885 MHz

F2 - Processing parameters  
 SI: 16384  
 SF: 500.1300136 MHz  
 NDW: EM  
 SSB: 0  
 LB: 0.50 Hz  
 GB: 0  
 PC: 1.00

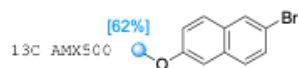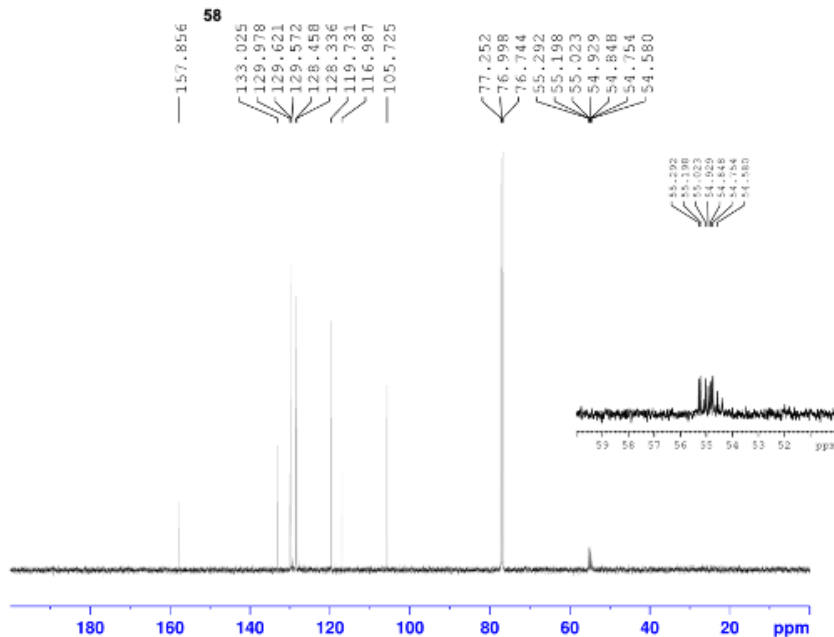

Current Data Parameters  
NAME yx0113-kyl-4128-1-1  
EXPNO 2  
PROCNO 1

F2 - Acquisition Parameters  
Date\_ 2020113  
Time 21.05  
INSTRUM spect  
PROBHD 5 mm PABBO BB/  
PULPROG zgpg30  
TD 65536  
SOLVENT CDCl3  
NS 207  
DS 0  
SMH 30030.029 Hz  
FIDRES 0.458222 Hz  
AQ 1.0911744 sec  
RG 16384  
DM 16.450 usec  
DE 6.00 usec  
TE 297.1 K  
D1 2.00000000 sec  
c11 0.03000000 sec  
DELTA 1.8599598 sec  
TD0 20

===== CHANNEL f1 =====  
NUC1 13C  
P1 8.90 usec  
PL1 0 dB  
SFO1 125.7709336 MHz

===== CHANNEL f2 =====  
CPDPRG2 waltz16  
NUC2 1H  
PCPD2 80.00 usec  
PL2 0.25 dB  
PL12 17.89 dB  
PL13 15.83 dB  
SFO2 500.1320005 MHz

F2 - Processing parameters  
SI 32768  
SF 125.7577961 MHz  
WDW EM  
SSB 0  
LB 1.00 Hz  
GB 0  
PC 1.40

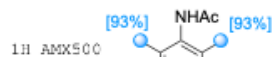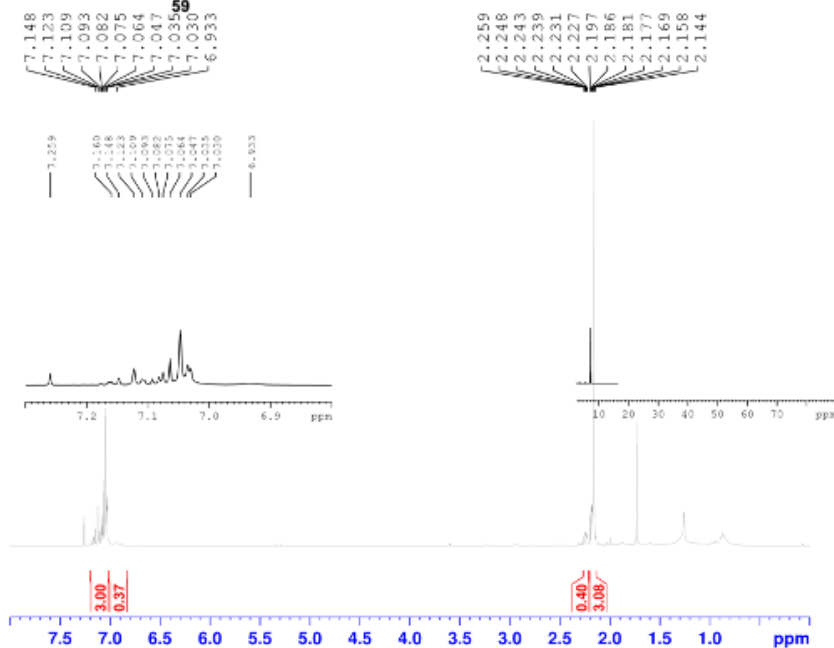

Current Data Parameters  
NAME yx0107-kyl-4123-2-1  
EXPNO 2  
PROCNO 1

F2 - Acquisition Parameters  
Date\_ 2020107  
Time 21.04  
INSTRUM spect  
PROBHD 5 mm PABBO BB/  
PULPROG zg30  
TD 32768  
SOLVENT CDCl3  
NS 8  
DS 0  
SMH 10330.570 Hz  
FIDRES 0.215264 Hz  
AQ 1.5859712 sec  
RG 71.8  
DM 48.400 usec  
DE 6.00 usec  
TE 296.4 K  
D1 1.00000000 sec  
TD0 1

===== CHANNEL f1 =====  
NUC1 1H  
P1 10.50 usec  
PL1 0.25 dB  
SFO1 500.1330885 MHz

F2 - Processing parameters  
SI 16384  
SF 500.1300137 MHz  
WDW EM  
SSB 0  
LB 0.30 Hz  
GB 0  
PC 1.00

13C AMX500

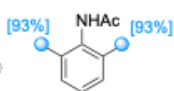

59

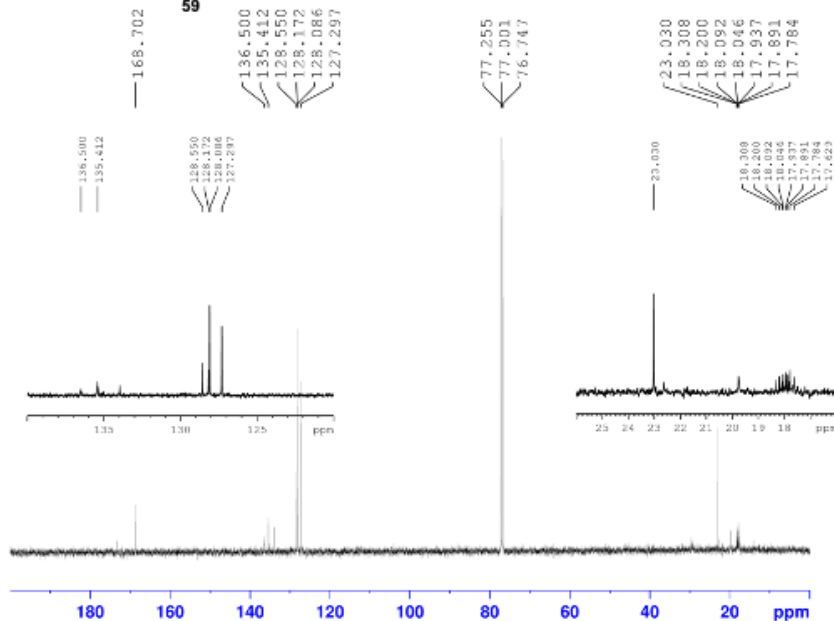

Supplement: SC-011-D0SC02661A-s001 [file SC-011-D0SC02661A-s001.pdf]
